# Supplementary material for: ITPI: Initial Transcription Process-Based Identification Method of Bioactive Components in Traditional Chinese Medicine Formula
Source: Evid Based Complement Alternat Med. 2016 Feb 29;2016:8250323. doi: 10.1155/2016/8250323 (PMC4789420; doi:10.1155/2016/8250323)
Supplement: Supplementary file 1 — Supplemental Information 1 shows the expression of all genes in black, model and mediated group. The results of mediated vs model also included. Supplemental Information 2 shows the 219 upregulated genes and 10 downregulated genes. Supplemental Information 3 shows the TFs of the DEGs. Supplemental Information 4 shows the components that interacted with the TFs. Supplemental Information 5 shows the 52 components of TZS. [file 8250323.f1.xls]

## Sheet: Supplemental Information 1
Probe Set ID	Blank group	Model group	Mediated group	Mediated vs Model
17607917	7.1747±0.61	5.3613±0.59	6.2128±0.97	2.89223
17674310	5.218±0.97	3.5785±0.61	4.0896±0.96	2.27633
17602091	5.0252±1.59	3.8045±0.21	5.1822±0.37	3.94262
17774850	4.1905±1.89	3.3033±0.12	3.7932±0.3	2.12582
17604133	8.1892±1.55	6.9364±0.82	7.1037±0.25	1.56748
17605853	6.1921±1.05	4.5751±1.06	5.4874±0.28	2.50777
17768956	7.5362±1.71	6.5827±0.04	6.6881±0.1	1.61515
17603763	4.0499±0.72	2.5874±0.03	2.9562±0.19	1.94528
17603199	4.5294±1.42	3.3948±0.13	3.6792±0.33	1.84705
17604897	5.773±0.55	4.3099±0.03	4.9167±0.83	2.47761
17606469	4.7228±0.83	3.356±0.3	4.4153±0.15	3.10116
17603389	6.5046±0.05	5.0422±0.16	5.8546±0.28	2.6502
17604579	5.8775±0.98	4.4302±1.11	5.7947±0.26	3.3836
17604275	3.9758±1.18	2.8286±0.45	2.5223±0.08	1.1846
17850292	5.9073±1.16	4.7432±0.28	5.4077±1.03	2.66404
17603255	3.8235±1.32	2.8589±0.33	2.7272±0.13	1.35429
17607287	5.7093±0.14	4.3486±0.13	5.1907±0.23	2.70038
17608121	5.0652±0.64	3.7812±0.29	4.4586±1.55	3.09736
17607057	4.8856±0.75	3.6485±0.53	4.187±1.03	2.38281
17606965	5.3808±1.04	4.2628±0.13	4.4403±0.6	1.76628
17608085	5.4269±0.47	4.1537±0.06	4.3355±0.51	1.75361
17601041	8.8486±2.1	8.3332±1.16	7.5322±0.32	0.747887
17601375	8.8486±2.1	8.3332±1.16	7.5322±0.32	0.747887
17606385	5.0528±0.96	3.8796±0.66	3.6553±0.3	1.23314
17606827	4.1736±0.68	2.9784±0.17	3.5316±0.41	2.23658
17607061	6.0533±1.26	4.9852±0.68	5.45±0.97	2.18945
17608771	6.0442±0.34	4.782±0.14	5.5678±0.76	2.76331
17606269	4.9462±0.48	3.73±0.13	4.5609±0.77	2.85665
17603249	5.0132±0.06	3.7562±0.03	4.6951±0.22	2.89145
17602019	6.5827±0.22	5.2772±0.6	6.6521±0.32	3.77256
17602199	5.311±0.36	4.0989±0.06	4.0904±0.06	1.49123
17603045	4.7242±1.13	3.7612±0.23	3.8966±0.13	1.64046
17607413	5.5198±0.48	4.3117±0.49	4.9113±1.09	2.53242
17608757	5.8553±0.39	4.6444±0.49	5.4979±0.04	2.63363
17602791	5.2533±0.6	4.0429±0.74	4.2419±0.37	1.64026
17604211	5.9975±0.35	4.8093±0.36	5.3752±0.02	2.1868
17607603	5.8989±0.41	4.4827±1.28	5.5648±0.02	2.64105
17609021	5.8989±0.41	4.4827±1.28	5.5648±0.02	2.64105
17603669	6.9915±0.35	5.8302±0.04	6.7726±0.65	3.03116
17602841	6.2772±0.38	5.122±0.18	6.1107±0.19	2.97839
17600677	5.989±0.46	4.8714±0.01	5.3978±0.34	2.19059
17610191	5.989±0.46	4.8714±0.01	5.3978±0.34	2.19059
17608801	5.7878±0.52	4.6399±0.55	5.8768±0.55	3.53348
17604675	4.6031±0.79	3.5362±0.59	3.7166±0.48	1.67522
17603917	4.392±0.81	3.3559±0.35	3.4548±0.09	1.58437
17606119	4.9873±0.53	3.8949±0.21	4.6417±1.19	2.94301
17609613	6.8182±0.28	5.6737±0.31	5.6727±0.36	1.50495
17604723	5.7079±0.63	4.5756±0.74	4.2362±0.32	1.12561
17670381	8.2833±0.7	7.2608±0.2	7.1674±0.01	1.39952
17600511	3.827±1.11	2.9408±0.66	2.7947±0.07	1.28877
17600017	5.6373±0.07	4.5245±0	4.7408±0.49	1.79224
17607619	6.5577±0.71	5.5662±0.17	5.8609±0.07	1.83475
17609037	6.5577±0.71	5.5662±0.17	5.8609±0.07	1.83475
17604615	5.3291±0.53	4.2658±0.32	4.6353±0.64	2.0094
17609209	6.654±0.18	5.5409±0.29	6.01±0.3	2.07815
17610009	5.9501±0.22	4.8565±0.03	5.6441±0.53	2.67559
17607769	5.8257±0.01	4.701±0.35	5.2718±0.01	2.19514
17604405	5.9284±0.59	4.8678±0.45	5.2049±0.68	1.95312
17600685	3.9501±1.63	3.4866±0.38	4.3882±1.22	3.25938
17610199	3.9501±1.63	3.4866±0.38	4.3882±1.22	3.25938
17609921	4.4702±0.41	3.4182±0.02	3.7438±0.27	1.89618
17604371	4.8042±1.06	3.928±0.18	4.3557±0.05	2.01002
17882905	8.3883±0.32	7.3295±0.03	7.9105±0.27	2.26382
17601943	4.9939±0.14	3.8335±0.71	4.8696±1.76	4.0397
17608705	4.1659±0.73	3.2074±0.33	3.1642±0.31	1.4539
17605267	6.8444±0.05	5.7768±0.11	6.7871±0.54	3.12505
17605347	6.2128±0.21	5.1556±0.09	5.7359±0.6	2.33946
17608651	5.334±1.16	4.5274±0.21	4.1523±0.32	1.16453
17619902	8.091±0.12	6.8615±1.04	7.9372±0.19	2.80437
17609657	6.5113±0.36	5.4936±0.09	5.8662±0.1	1.94251
17609463	6.0255±0.14	4.9838±0.14	5.2849±0.05	1.84412
17600459	5.5099±0.64	4.5593±0.09	5.813±0.03	3.57393
17609975	4.4901±0.91	3.6057±0.52	4.5841±0.36	2.90769
17767056	6.2122±0.75	5.2644±0.46	6.0619±0.52	2.6247
17822898	7.3195±0.15	6.0965±1.1	6.3267±0.36	1.5565
17606333	4.4231±0.74	3.5362±0	3.556±0.36	1.54446
17605767	5.0424±0.65	4.1018±0.19	4.6753±0.3	2.24669
17601121	5.7257±0.9	4.8571±0.24	4.6198±0.31	1.27866
17601455	5.7257±0.9	4.8571±0.24	4.6198±0.31	1.27866
17606575	6.3486±0.21	5.2831±0.56	6.083±0.01	2.51677
17605415	3.9793±0.79	3.1129±0.05	3.184±0.34	1.5973
17678895	5.7835±0.04	4.7382±0.42	6.0021±1.16	4.11161
17602201	6.6338±0.34	5.6321±0.27	6.1233±0.15	2.09594
17603545	4.7018±0.52	3.7312±0.33	4.288±0.56	2.2607
17600155	6.0559±0.5	5.0051±0.77	6.326±0.84	3.78988
17604023	4.6692±0.43	3.7041±0.03	3.7824±0.62	1.6579
17605909	5.7132±0.4	4.7373±0.17	4.699±0.46	1.49291
17609743	5.8893±0.21	4.895±0.11	5.5885±0.31	2.45053
17604213	5.47±0.34	4.4938±0.04	4.9625±0.26	2.09256
17693957	5.2392±0.24	4.2511±0.01	4.0784±0.31	1.34617
17608511	4.3644±0.08	3.272±0.75	3.1511±0.3	1.30549
17608725	6.8135±0.61	5.868±0.39	6.9332±0.13	3.08763
17604971	4.7109±0.41	3.7473±0.22	3.9316±0.15	1.69964
17601143	4.6813±0.53	3.6735±0.65	4.288±0.27	2.20283
17601477	4.6813±0.53	3.6735±0.65	4.288±0.27	2.20283
17604895	7.0041±0.07	6.0109±0.01	6.0451±0	1.53587
17603141	5.4389±0.75	4.5483±0.3	4.4257±0.2	1.36988
17603267	5.433±0.32	4.4532±0.31	4.7364±0.65	1.89652
17607909	4.015±0.57	3.1063±0.07	3.7727±0.04	2.37977
17602993	4.6628±0.34	3.6765±0.41	4.3326±0.49	2.38417
17604121	5.6049±1.74	5.1912±0.83	4.768±0.03	1.03136
17625472	4.6083±0.78	3.7384±0.35	4.3825±0.46	2.36898
17721892	6.8046±0.12	5.8054±0.38	6.2707±0.27	2.05237
17602121	6.7296±0.35	5.5522±1.17	6.3976±0.37	2.34007
17603023	5.5496±0.23	4.5868±0.1	5.3642±0.42	2.62186
17605119	6.4879±0.22	5.5076±0.32	6.186±0.17	2.37876
17674957	7.5564±0.06	6.4681±0.83	7.0658±0.09	2.09493
17882819	7.5564±0.06	6.4681±0.83	7.0658±0.09	2.09493
17606467	4.7903±0.17	3.82±0.21	4.7434±1.01	3.18092
17603237	5.4573±0.63	4.5418±0.49	4.8662±0.14	1.82961
17605541	6.561±0.29	5.6062±0.18	6.5498±0.62	3.00804
17606533	9.0516±0.17	8.0721±0.35	8.4404±0.15	1.91422
17607039	5.4805±0.1	4.4894±0.4	4.0856±0.39	1.1325
17602945	5.1769±0.52	4.2549±0.36	4.1275±0.34	1.37098
17869572	5.0798±0.54	4.1554±0.45	4.5981±0.16	1.99681
17608817	5.6787±0.22	4.7041±0.39	4.9532±0.6	1.8287
17817435	6.218±0.4	5.2771±0.34	6.223±0.19	2.86301
17607021	5.7713±0.44	4.836±0.38	5.3619±0.89	2.32721
17609653	5.4495±0.76	4.6192±0.11	4.9268±0.12	1.85704
17602907	5.7414±0.11	4.7905±0.01	5.7636±0.06	2.94614
17601791	5.6786±0.32	4.7438±0.19	5.0823±0.06	1.88976
17603799	3.3838±0.71	2.5416±0.02	2.791±0.43	1.82239
17607091	5.0204±0.52	4.0738±0.56	3.5603±0.8	1.08977
17602027	5.4076±0.13	4.4635±0.05	4.9225±0.24	2.0752
17600681	6.4491±0.27	5.5138±0.16	5.035±0	1.07307
17610195	6.4491±0.27	5.5138±0.16	5.035±0	1.07307
17608891	6.3395±0.66	5.4963±0	5.6513±0.26	1.68356
17602717	5.5259±0.06	4.5761±0.17	4.554±0.25	1.48254
17609983	5.352±0.21	4.3974±0.37	5.0394±0.06	2.30448
17602427	6.6361±0.47	5.6976±0.56	6.2628±0.3	2.16317
17604417	6.7673±0.54	5.8464±0.52	6.4981±0.18	2.2914
17607627	4.3636±0.25	3.438±0.13	4.466±0.53	3.15705
17609045	4.3636±0.25	3.438±0.13	4.466±0.53	3.15705
17608159	4.8802±0.12	3.945±0.12	3.9729±0.1	1.52858
17602949	5.8073±0.85	5.0212±0.06	4.6116±0.3	1.14091
17604711	6.4345±0.47	5.303±1.22	5.8742±0.11	1.88481
17606635	4.3842±0.25	3.4628±0.12	3.3429±0.27	1.39057
17785460	4.7227±0.4	3.8239±0.06	4.0204±0.71	1.82472
17605729	7.0041±0.53	6.0123±0.87	6.4198±0.33	1.84394
17603827	5.5343±0.66	4.6584±0.55	4.7454±0.87	1.67819
17604175	5.8733±0.25	4.9578±0.06	5.2976±0.17	1.90442
17603573	4.8082±0.68	3.9766±0.03	4.2173±0.79	1.90548
17725255	5.9338±0.58	4.985±0.76	5.821±0.05	2.50262
17791947	4.7126±0.52	3.8446±0.22	4.3854±0.31	2.19389
17603039	6.8286±0.62	5.8939±0.77	6.6223±0.57	2.41236
17607393	5.3608±0.61	4.5307±0.1	4.4736±1	1.61807
17709266	5.1909±0.28	4.2816±0.28	4.7491±0.02	2.05523
17608415	6.1251±0.4	5.2359±0.3	5.5715±0.2	1.8813
17791704	4.3892±0.64	3.5595±0.17	3.907±0.25	1.91618
17735857	7.787±0.34	6.8834±0.34	7.3836±0.26	2.10821
17608811	4.8995±0.65	4.0073±0.65	4.4043±0.41	1.91863
17604441	3.9796±0.56	3.1056±0.53	4.0349±0.38	2.81158
17609385	6.9523±0.1	5.7856±1.28	6.1745±0.07	1.63428
17771938	6.2501±0.4	5.2742±0.82	6.0678±0.21	2.41834
17605977	6.1933±0.59	5.3364±0.44	5.7761±0.62	2.08198
17605569	4.1203±0.29	3.2309±0.25	4.0438±0.75	2.79495
17874629	4.7614±0.12	3.8659±0.23	4.1487±0.55	1.87928
17602551	4.206±0.55	3.388±0.01	3.9595±0.61	2.33063
17601569	6.3396±0.36	5.4771±0.14	5.7263±0.8	1.91757
17604365	6.1445±0.18	5.2597±0.14	5.4792±0.15	1.74679
17774860	8.8524±0.19	7.9648±0.2	8.6875±0.07	2.46481
17607479	5.2612±0.17	4.344±0.45	5.2806±0.02	2.80169
17608897	5.2612±0.17	4.344±0.45	5.2806±0.02	2.80169
17600115	7.2984±0.11	6.4042±0.25	7.024±0.24	2.30342
17607669	7.1961±0.14	6.315±0.12	6.6199±0.28	1.86715
17609087	7.1961±0.14	6.315±0.12	6.6199±0.28	1.86715
17791965	5.6245±0.33	4.7575±0.25	5.4507±0.45	2.46627
17604033	6.1785±0.33	5.2951±0.4	6.1912±0.16	2.74755
17609959	6.1563±0.75	5.2886±0.86	6.1331±0.3	2.49702
17764285	4.8095±0.13	3.9216±0.26	4.6063±0.34	2.42538
17601703	5.6115±0.43	4.7433±0.43	5.8078±0.08	3.07211
17603561	4.2085±0.21	3.3407±0.01	3.466±0.14	1.6401
17608563	5.0219±0.59	4.2297±0.08	4.5591±0.38	1.91653
17602741	6.3004±0.45	5.445±0.36	5.1351±0.09	1.19223
17832374	4.5022±1.73	4.1013±0.42	3.451±0.12	0.937215
17600081	4.1749±0.34	3.3247±0.16	3.1938±0.3	1.38049
17607035	6.4208±0.24	5.5145±0.52	6.4068±0.16	2.70302
17732958	5.2623±0.28	4.4094±0.06	4.9822±0.36	2.26466
17601837	5.9347±0.47	5.101±0.33	5.3376±0.67	1.83821
17623687	6.6742±0.12	5.7987±0.25	6.4971±0.11	2.41953
17609221	4.1684±0.44	3.3436±0.05	3.9116±0	2.22288
17608507	4.3977±0.75	3.6396±0.4	3.98±0.31	1.88563
17608223	6.3972±0.64	5.6056±0.24	5.7295±0.06	1.62369
17635600	8.6515±0.72	7.911±0.04	7.5081±0.26	1.14345
17603399	5.8004±0.74	4.973±0.76	5.6292±0.32	2.23848
17605919	5.2806±0.46	4.4373±0.42	4.8346±0.51	1.99407
17602863	6.0835±0.64	5.2577±0.55	5.613±0.37	1.88293
17606161	5.1934±0.84	4.4874±0.34	4.2264±0.23	1.24225
17605067	4.4022±0.25	3.5146±0.52	4.0773±0.81	2.31531
17609477	6.1978±0.53	5.3787±0.41	5.7689±0.25	1.94018
17607047	4.1009±0.69	3.3467±0.03	3.9497±0.32	2.30663
17608881	4.762±0.59	3.9825±0.09	4.1836±0.44	1.76231
17600731	5.2977±0.38	4.4792±0	5.0216±0.21	2.19617
17610245	5.2977±0.38	4.4792±0	5.0216±0.21	2.19617
17656194	6.2283±0.11	5.2916±0.73	5.5078±0.65	1.72235
17605573	5.1415±0.27	4.3039±0.21	4.5275±0.42	1.77944
17605597	5.6136±0.62	4.8396±0.25	4.945±0.2	1.60943
17604583	4.937±0.85	4.2417±0.02	3.4957±0.26	0.901406
17825058	5.9911±0.53	5.2089±0.21	6.1764±0.12	2.92292
17698008	6.2157±0.71	5.4344±0.54	5.1474±0.36	1.20629
17601601	6.0482±0.39	5.2308±0.3	5.9675±0.16	2.48088
17602193	6.9381±0.26	6.1112±0.18	6.6426±0.61	2.25691
17609945	4.314±1.18	3.7894±0.37	4.5765±0.19	2.55665
17619401	6.7972±0.34	5.9297±0.59	6.2591±0.09	1.80942
17607809	6.3805±0.33	5.5723±0.1	6.4096±0.48	2.75306
17607861	6.3805±0.33	5.5723±0.1	6.4096±0.48	2.75306
17602337	7.8127±0.19	6.9302±0.59	7.7368±0.12	2.52271
17608731	6.7407±0.37	5.9102±0.43	6.3762±0.33	2.05175
17602605	5.9524±0.67	5.2108±0.38	5.2737±0.19	1.54682
17822885	7.5856±0.8	6.8585±0.42	6.9134±1.11	1.7589
17602927	4.8787±0.78	4.1989±0.08	4.7999±0.22	2.28725
17609609	5.6686±0.66	4.9226±0.35	5.4831±0.34	2.20985
17606983	4.8602±0.84	4.2061±0.11	4.4499±0.91	1.95482
17610349	3.8063±0.32	3.0094±0.01	3.17±0.07	1.67754
17607295	5.1358±0.75	4.433±0.08	4.6945±1.16	2.09283
17602159	4.3361±0.42	3.542±0.31	4.4152±0.25	2.7372
17605639	5.0005±0.18	4.1598±0.43	4.5279±0.29	1.91314
17608473	4.0684±0.29	3.2412±0.43	3.0985±0.09	1.33011
17701208	4.7294±0.56	3.9861±0.08	4.2252±0.08	1.77044
17721925	7.3019±1.01	6.7372±0.01	6.6682±0.52	1.47722
17781865	8.0268±1.82	7.1926±1.99	7.746±2.3	2.47459
17610021	4.1301±0.54	3.3881±0.15	3.7772±0.04	1.95969
17603601	5.0681±1.01	4.4861±0.33	5.1155±1.12	2.64271
17607179	7.7325±0.44	6.9637±0.14	7.1086±0.17	1.66018
17603279	6.1376±0.21	5.3327±0.22	6.1392±0.31	2.63843
17756175	6.8092±0.44	6.0504±0.07	6.7614±0.34	2.48799
17604591	6.3532±0.46	5.5756±0.39	5.9377±0.07	1.89412
17849780	4.3183±0.53	3.5823±0.16	4.195±0.24	2.30184
17601179	6.2762±0.6	5.5603±0	6.0248±0.11	2.07292
17601513	6.2762±0.6	5.5603±0	6.0248±0.11	2.07292
17600111	5.2155±0.24	4.428±0.07	4.0571±0.17	1.16349
17605825	5.0573±0.66	4.3634±0	4.8196±0.15	2.06379
17620632	5.7512±0.22	4.9162±0.52	5.3629±0.24	1.99187
17603765	4.7325±0.79	4.0892±0.02	4.3797±0.61	1.91749
17720672	6.7288±0.11	5.9005±0.44	6.8166±0.29	2.79306
17882873	6.7288±0.11	5.9005±0.44	6.8166±0.29	2.79306
17608041	7.23±0.3	6.4496±0.18	6.9361±0.19	2.10247
17605575	6.1403±0.24	5.2508±0.81	5.8862±0.41	2.20145
17605801	6.2069±0.58	5.4702±0.34	6.0155±0.01	2.15878
17607311	3.7935±0.69	3.1042±0.11	3.2405±0.53	1.70258
17609589	6.9168±0.3	5.9963±0.95	6.5715±0.25	2.02933
17606147	5.6585±0.3	4.8593±0.41	4.2474±0.35	0.975766
17608011	5.0641±0.32	4.2851±0.28	4.2173±0.36	1.43969
17603641	5.2768±0.59	4.5585±0.13	4.8872±0.11	1.88291
17883111	6.1906±0.17	5.3941±0.29	6.1138±0.43	2.50141
17606481	5.36±0.3	4.5914±0.01	5.3844±0.85	2.82566
17605799	5.067±0.16	4.2826±0.1	4.8001±0.25	2.16052
17732721	6.906±0.62	6.1802±0.43	5.5867±0.81	1.05008
17739956	4.7036±0.38	3.939±0.28	4.2138±0.27	1.81282
17696398	3.9683±0.19	3.1896±0.09	3.467±0.08	1.81763
17603755	6.5057±0.66	5.8124±0.04	6.1459±0.34	1.91548
17602391	5.5735±0.37	4.8209±0	4.8529±0.21	1.54178
17601849	6.5655±0.15	5.7844±0.15	6.4156±0.02	2.31749
17676821	4.1022±0.68	3.4185±0.24	3.6497±0.29	1.76704
17602947	5.6832±0.9	4.9589±0.83	5.28±0.21	1.73909
17830872	6.3839±0.08	5.5782±0.4	6.4513±0.32	2.72858
17713211	5.0392±0.26	4.256±0.33	5.0103±0.26	2.51801
17601741	3.9846±0.43	3.2396±0.21	3.9418±0.44	2.48328
17684940	5.0379±0.44	4.2842±0.33	4.5364±0.44	1.80427
17609901	6.9789±0.38	6.2341±0.07	5.9951±0.36	1.28961
17607631	5.5878±0.08	4.8017±0.25	5.0054±0.5	1.76684
17609049	5.5878±0.08	4.8017±0.25	5.0054±0.5	1.76684
17605721	5.8968±0.25	5.1338±0.09	5.5804±0.14	2.04747
17605687	6.5199±0.36	5.6843±0.73	5.5748±0.78	1.40285
17603749	4.6452±0.7	3.9668±0.35	4.1186±0.34	1.66423
17607767	3.6006±1.19	3.1613±0.26	5.0682±0.31	5.64334
17600607	4.0607±0.53	3.3451±0.04	3.4178±0.18	1.5837
17610121	4.0607±0.53	3.3451±0.04	3.4178±0.18	1.5837
17600715	5.7083±0.43	4.9621±0.3	5.6359±0.14	2.37347
17610229	5.7083±0.43	4.9621±0.3	5.6359±0.14	2.37347
17605317	6.9666±0.05	6.1924±0.06	7.0179±0.1	2.66017
17609711	5.5683±0.21	4.7006±0.78	4.9964±0.08	1.71427
17601699	5.4501±0.1	4.671±0.22	5.1957±0.6	2.23779
17602231	6.6533±0.41	5.784±0.89	6.26±0.5	1.96159
17850784	4.0032±0.62	3.3191±0.13	3.5693±0.51	1.83679
17601975	4.3651±0.2	3.5968±0.17	3.7237±0.24	1.64372
17604739	5.9768±0.53	5.2617±0.15	5.5471±0.22	1.83384
17603821	5.0318±0.29	4.1648±0.83	4.3348±0.29	1.57324
17602989	5.2348±0.6	4.4891±0.56	5.193±0.04	2.35502
17601827	5.5194±0.64	4.8505±0	5.9041±0.98	3.47757
17832377	6.7317±0.48	5.933±0.71	5.5821±0.62	1.16025
17605309	6.0234±0.11	5.1823±0.67	5.8614±0.1	2.28103
17608217	4.644±0.59	3.9369±0.36	2.9623±0.36	0.763243
17815318	5.0255±0.26	4.2547±0.34	4.7538±0.02	2.09059
17874057	3.953±0.21	3.1925±0.16	3.7672±0.23	2.2415
17600981	3.6711±0.38	2.9298±0.25	3.3847±0.11	2.04397
17601315	3.6711±0.38	2.9298±0.25	3.3847±0.11	2.04397
17720733	5.1377±0.67	4.4604±0.39	4.8664±0.14	1.9559
17713897	4.169±0.84	3.5062±0.58	3.7053±0.15	1.6591
17608629	4.8771±0.42	4.134±0.38	5.1791±0.28	3.0716
17607169	6.0662±1.06	5.5673±0.27	5.8988±0.38	1.9033
17732722	6.0014±0.69	5.3217±0.37	5.5253±0.49	1.75014
17756113	3.5507±0.43	2.8309±0.06	3.2901±0.6	2.15094
17603983	4.6939±0.23	3.9401±0.21	4.1159±0.04	1.68579
17683397	3.4735±0.78	2.8572±0.2	3.0173±0.01	1.66833
17605139	5.2266±0.99	4.694±0.3	5.3929±0.28	2.43234
17601765	4.3561±0.56	3.5454±0.84	3.4094±0.6	1.31155
17603633	5.9516±0.4	5.2273±0.13	5.131±0.56	1.45452
17603067	5.7093±0.24	4.924±0.5	5.0734±0.77	1.73249
17603911	6.8121±0.07	6.0605±0.07	5.6865±0.97	1.29029
17731952	7.8376±0.16	6.9116±1.04	6.9803±0.72	1.47435
17602467	6.6822±0.3	5.9498±0.11	6.5245±0.1	2.2332
17607007	5.1588±0.46	4.452±0.16	4.6261±0.59	1.75838
17600999	5.8323±0.35	5.0995±0.25	5.5611±0.34	2.07749
17601333	5.8323±0.35	5.0995±0.25	5.5611±0.34	2.07749
17605393	6.7673±0.66	6.0427±0.69	6.5491±0.02	2.01381
17600565	7.8523±0.35	7.1216±0.22	7.4875±0.05	1.92283
17610079	7.8523±0.35	7.1216±0.22	7.4875±0.05	1.92283
17604683	3.4356±0.82	2.8487±0.09	2.5867±0.13	1.25219
17664363	5.715±0.53	5.0077±0.39	5.3516±0.29	1.88944
17604463	5.4495±0.18	4.7041±0.17	5.2508±0.08	2.18528
17603941	4.1648±0.52	3.4565±0.34	3.2579±0.06	1.29008
17690968	8.6372±0.18	7.8959±0.08	8.52±0.08	2.31186
17690969	8.6372±0.18	7.8959±0.08	8.52±0.08	2.31186
17600277	5.274±0.34	4.534±0.35	4.4618±0.1	1.40811
17600165	5.0474±0.79	4.4137±0.3	4.5078±0.08	1.58512
17600001	6.0433±0.08	5.2905±0.21	5.5463±0.97	1.98746
17606845	4.3099±0.39	3.6±0.04	3.9634±0.48	1.98361
17608201	4.7073±1.25	4.2498±0.18	4.0366±0.06	1.28975
17609893	6.7042±0.44	5.8839±0.85	5.815±0.98	1.46845
17609439	6.4599±0.53	5.7785±0.05	5.9766±0.07	1.72125
17600533	4.7196±0.6	4.018±0.48	4.5038±0.21	2.05559
17610047	4.7196±0.6	4.018±0.48	4.5038±0.21	2.05559
17605433	5.1581±0.61	4.5042±0.03	4.7686±0.33	1.82532
17604443	5.0371±0.45	4.2472±0.75	5.0361±0.32	2.45515
17828153	5.83±1.07	5.351±0.1	4.5976±0.84	0.965821
17603519	6.4031±0.34	5.6816±0.24	5.9187±0.43	1.79464
17635606	10.4306±0.57	9.7679±0.05	9.3937±0.04	1.15715
17695003	5.2616±0.27	4.5394±0.1	4.7103±0.31	1.70622
17606133	5.66±0.41	4.8452±0.84	5.3702±0.93	2.19843
17609883	5.8657±0.2	5.0182±0.85	5.7745±0.72	2.47556
17605747	6.8741±0.51	6.1616±0.47	7.1671±0.28	2.96133
17673102	8.9647±0.24	8.2061±0.46	8.1794±0.46	1.47226
17656349	6.1252±0.42	5.4295±0	5.8977±0	2.07508
17603853	6.2974±0.26	5.5788±0.02	6.0594±0.43	2.13858
17606075	5.8218±0.08	5.075±0.3	5.3906±0.2	1.85574
17603183	4.703±0.86	4.1194±0.2	4.6254±0.59	2.21084
17606339	3.6278±0.39	2.8909±0.48	3.1298±0.46	1.76552
17607595	4.2282±0.74	3.6327±0.11	2.9448±0.03	0.929935
17609013	4.2282±0.74	3.6327±0.11	2.9448±0.03	0.929935
17600581	6.1541±0.21	5.4329±0.1	5.731±0.21	1.85186
17610095	6.1541±0.21	5.4329±0.1	5.731±0.21	1.85186
17791971	4.3434±0.4	3.6489±0.13	3.9195±0.16	1.81103
17700396	4.9382±0.16	4.2137±0.09	5.1261±0.19	2.83225
17869467	6.8173±0.12	6.0927±0.01	6.0658±0.79	1.5841
17870157	6.8173±0.12	6.0927±0.01	6.0658±0.79	1.5841
17826910	3.7964±0.38	3.1004±0.1	3.3199±0.24	1.75657
17601215	5.6961±0.75	5.0129±0.75	5.1062±0.19	1.50533
17601549	5.6961±0.75	5.0129±0.75	5.1062±0.19	1.50533
17868867	4.8338±0.57	4.1765±0.14	4.557±0.04	1.94861
17696863	5.4389±0.41	4.7441±0.22	4.9204±0.04	1.6858
17601855	3.9873±0.31	3.2816±0.12	3.1942±0.14	1.41299
17602609	5.7019±1.25	4.9475±1.48	5.3193±0.48	1.56559
17670456	4.723±0.4	4.0308±0.19	4.378±0.11	1.9026
17608831	5.6754±0.94	5.1673±0.18	4.9292±0.24	1.27557
17608625	6.5013±0.48	5.7343±0.77	5.4118±0.62	1.17179
17764019	5.8857±0.63	5.1925±0.62	5.7435±0.44	2.15008
17603321	4.4523±0.65	3.827±0.15	4.5622±0.45	2.55235
17670122	4.5537±0.36	3.8617±0.15	4.4269±0.54	2.29171
17607965	4.306±0.4	3.6163±0.21	4.2191±0.87	2.47482
17604713	6.3006±0.45	5.6248±0.19	6.0527±0.06	2.00968
17607353	4.833±1.2	4.441±0.46	4.1541±0.7	1.27125
17608281	5.0478±0.32	4.3498±0.21	4.7247±0.11	1.9379
17605619	4.0366±0.64	3.3951±0.28	3.9025±0.36	2.14489
17600949	6.062±0.31	5.3517±0.32	5.747±0	1.94839
17601283	6.062±0.31	5.3517±0.32	5.747±0	1.94839
17604473	5.208±0.41	4.53±0.09	5.3078±0.24	2.58726
17606419	7.2458±0.33	6.5315±0.39	6.6739±0.04	1.62601
17883171	11.4648±0.68	10.8261±0.36	11.8362±0	2.97348
17600927	5.7886±0.19	5.0799±0.18	5.802±0.32	2.49539
17601247	5.7886±0.19	5.0799±0.18	5.802±0.32	2.49539
17601261	5.7886±0.19	5.0799±0.18	5.802±0.32	2.49539
17666805	5.3263±0.19	4.6254±0.01	5.5335±0.58	2.93035
17698325	4.9535±0.41	4.2354±0.53	4.2272±0.23	1.4512
17603139	6.3417±0.46	5.6812±0.06	6.4605±0.4	2.6226
17806400	4.3539±0.05	3.6201±0.39	3.9848±0.36	1.92692
17606541	3.4636±0.37	2.7858±0.1	3.0919±0	1.85209
17606315	4.1197±0.49	3.4654±0.12	3.854±0.16	1.96616
17825011	3.5857±0.27	2.8955±0.04	3.0742±0.23	1.70835
17614602	5.0163±0.35	4.3336±0.17	4.7462±0.15	1.99475
17661660	9.8816±0.14	9.1771±0.13	9.551±0.13	1.94384
17607761	5.6694±0.88	5.1492±0.1	5.5771±0.48	2.07082
17609179	5.6694±0.88	5.1492±0.1	5.5771±0.48	2.07082
17603955	5.5284±0.63	4.8297±0.69	4.7333±0.05	1.32575
17607805	6.9886±0.28	6.2883±0.29	7.0184±0.04	2.46323
17607857	6.9886±0.28	6.2883±0.29	7.0184±0.04	2.46323
17608285	3.8213±0.39	3.1492±0.09	3.0243±0.22	1.38189
17602151	6.3823±0.62	5.7066±0.6	5.7692±0.49	1.54489
17603429	6.8192±0.49	6.1579±0.24	6.1566±0.21	1.4969
17606843	6.0578±0.31	5.3438±0.44	5.6525±0.56	1.8854
17609383	7.5376±0.13	6.816±0.37	7.1942±0.47	1.97031
17608607	6.0897±0.41	5.3642±0.6	5.3915±0.02	1.46421
17846276	8.7305±0.17	8.0304±0.17	8.5504±0.06	2.14468
17873938	6.582±0.31	5.9024±0.06	6.3112±0.37	2.02381
17626408	4.0308±0.3	3.3455±0.14	3.8489±0.22	2.13398
17607581	4.3552±0.44	3.686±0.23	3.8475±0.06	1.66819
17608999	4.3552±0.44	3.686±0.23	3.8475±0.06	1.66819
17603685	6.1951±0.25	5.5053±0.13	5.8754±0.82	2.09383
17605159	5.3553±0.45	4.7±0.12	5.4167±0.67	2.59584
17787120	5.2227±0.01	4.5157±0.2	5.0529±0.19	2.17542
17688200	8.2237±0.44	7.534±0.44	7.271±0.24	1.22967
17671812	8.3619±0.23	7.674±0.05	8.0076±0.42	1.93015
17608527	4.5238±0.62	3.9076±0.02	3.7006±0.07	1.30011
17604083	6.8929±0.04	6.147±0.54	6.868±0.39	2.4345
17601123	6.9181±0.37	6.1842±0.63	6.8237±0.02	2.22909
17601457	6.9181±0.37	6.1842±0.63	6.8237±0.02	2.22909
17608551	3.5419±0.38	2.8676±0.26	3.0376±0.41	1.70661
17600589	5.3227±0.22	4.6006±0.47	4.687±0.56	1.61118
17610103	5.3227±0.22	4.6006±0.47	4.687±0.56	1.61118
17603663	5.0399±0.29	4.3083±0.57	4.7468±0.67	2.06198
17603063	4.7573±0.81	4.1814±0.42	4.7119±1.36	2.60889
17601793	4.1809±0.2	3.4877±0.22	4.215±0.31	2.4971
17605345	3.8087±0.37	3.1434±0.15	3.63±0.24	2.11068
17607943	4.7185±0.19	3.9933±0.48	4.506±0.07	2.08294
17636287	8.3604±0.39	7.6821±0.35	7.7089±0.6	1.572
17608123	5.6115±1.15	5.1484±0.43	5.4683±0.92	2.01996
17684948	3.7804±0.44	3.125±0.18	3.2956±0.05	1.68236
17600305	5.5786±0.23	4.8549±0.51	5.6067±0.57	2.54683
17824920	4.0388±0.29	3.366±0.02	3.768±0.19	1.99065
17606399	5.3483±0.46	4.6996±0.21	5.3453±0.13	2.33873
17876887	4.3987±0.4	3.7455±0.02	4.2015±0	2.05746
17602603	6.1907±0.68	5.6131±0.04	5.5803±0.32	1.48387
17608655	5.2467±1.2	4.8514±0.6	5.5657±0.66	2.48177
17609805	3.6888±0.78	3.1493±0.03	3.5154±0.13	1.93674
17603729	6.464±0.14	5.6766±0.78	6.604±0.32	2.68848
17608327	4.0179±0.34	3.3263±0.41	3.884±0.03	2.16365
17651099	3.8983±0.26	3.2236±0.08	3.623±0	1.97696
17609949	6.4711±0.33	5.8004±0.2	6.2429±0.77	2.17705
17604123	6.8802±0.64	6.2797±0.18	6.789±0.12	2.13077
17606933	6.1129±0.65	5.5288±0.01	5.8399±0.27	1.87721
17609391	6.011±0.1	5.2825±0.51	5.6386±0.44	1.90463
17605277	5.5131±0.28	4.839±0.18	5.0041±0.19	1.6822
17606925	3.27±0.36	2.6162±0.01	3.0118±0.43	2.01675
17600387	5.9905±0.62	5.3623±0.45	6.2191±0.61	2.76865
17791922	5.5922±0.22	4.8928±0.39	5.1615±0.36	1.80214
17608347	7.1079±0.25	6.3901±0.52	6.8218±0.01	1.9582
17833378	5.2783±0.39	4.5521±0.68	5.2807±0.28	2.37688
17608723	6.8854±0.35	6.1652±0.61	6.793±0.23	2.23095
17602191	5.563±0.12	4.862±0.34	4.9589±0.31	1.6001
17822890	5.907±1.33	5.4983±0.56	6.5496±0.42	3.05917
17671810	7.5169±0.22	6.8284±0.3	6.5796±0.7	1.32232
17710423	4.7322±0.22	4.0484±0.27	4.3585±0.27	1.86024
17603997	4.3319±0.61	3.7344±0.02	3.8983±0.46	1.72339
17600673	5.2265±0.46	4.577±0.31	5.105±0.16	2.14487
17610187	5.2265±0.46	4.577±0.31	5.105±0.16	2.14487
17603927	5.1324±0.42	4.4893±0.03	4.6227±0.31	1.66409
17824832	3.5999±0.74	3.0199±0.45	3.1619±0.52	1.6685
17606493	6.3446±0.16	5.6348±0.46	5.8159±0.16	1.66411
17608875	5.8069±0.58	5.1773±0.44	5.7799±0.37	2.2628
17869545	5.7557±0.47	5.0847±0.48	5.5045±0.23	1.96429
17711489	4.6986±0.4	4.0565±0.01	3.9175±0.12	1.36466
17789098	5.6943±0.07	5.0139±0.17	5.4974±0.17	2.09752
17606005	4.4115±0.34	3.7226±0.48	4.3035±0.03	2.18306
17637184	3.6303±0.63	3.04±0.07	3.6595±0.14	2.30848
17609217	6.0195±0.52	5.404±0.21	6.01±0.32	2.29924
17609699	6.8935±0.29	6.2387±0.08	6.7711±0.13	2.1724
17604437	7.7122±0.28	7.057±0.02	7.3921±0.04	1.89235
17805769	4.2686±0.4	3.6054±0.42	3.9102±0.07	1.81578
17604323	6.426±0.28	5.7712±0.1	6.0551±0.17	1.83029
17606727	5.3964±0.27	4.7399±0.1	5.2926±0.06	2.19838
17793457	9.4589±0.25	8.7989±0.14	9.1042±0.39	1.88377
17626410	4.6995±0.22	4.0399±0.03	4.4736±0.1	2.02837
17607597	3.7918±0.37	3.1469±0.22	3.1565±0.71	1.59314
17609015	3.7918±0.37	3.1469±0.22	3.1565±0.71	1.59314
17609745	5.5877±0.86	4.9083±1.07	6.1304±0.22	3.087
17602973	4.1435±0.64	3.5664±0.1	3.8757±0.85	2.02022
17792068	5.1944±0.52	4.5889±0.13	4.6918±0.29	1.62308
17624370	5.1354±0.15	4.4613±0.26	5.212±0.36	2.54372
17790075	4.9504±0.09	4.2844±0.06	4.3539±0.22	1.58275
17605437	5.9075±0.62	5.3197±0.14	5.8448±0.04	2.15417
17619900	6.7061±0.89	6.1744±0.37	6.0367±0.23	1.35015
17727949	7.554±0.41	6.9284±0.03	6.914±0.49	1.52859
17869518	6.8779±0.07	6.177±0.46	6.3926±0.03	1.6994
17606165	6.1514±0.43	5.487±0.5	5.9019±0.07	1.94177
17839274	7.0323±0.28	6.3787±0.18	6.6575±0.18	1.82001
17868721	4.5562±0.41	3.9102±0.32	4.4236±0.7	2.24192
17702253	6.0388±0.08	5.3667±0.22	5.9551±0	2.24295
17688197	6.3558±0.65	5.7848±0.13	5.3915±0.18	1.14425
17664824	6.0272±0.15	5.365±0.11	6.0858±0.08	2.47048
17608417	5.3754±0.11	4.7042±0.23	4.8707±0.79	1.80098
17606127	6.9399±0.71	6.3932±0.16	6.8507±0.12	2.05678
17604201	4.1147±0.3	3.4665±0.15	3.8962±0.39	2.05123
17817708	3.5585±0.43	2.9369±0.09	3.1977±0	1.79545
17600557	7.1186±0.2	6.3837±0.69	6.8432±0.29	1.96866
17610071	7.1186±0.2	6.3837±0.69	6.8432±0.29	1.96866
17872783	4.3534±0.71	3.8145±0.12	4.5631±0.3	2.54306
17815025	5.3318±0.3	4.687±0.17	4.9022±0.19	1.74298
17606031	6.4015±0.44	5.7306±0.57	6.2928±0.59	2.2217
17607485	4.0676±0.94	3.5753±0.51	3.7186±0.66	1.69162
17608903	4.0676±0.94	3.5753±0.51	3.7186±0.66	1.69162
17604273	3.5439±0.42	2.9164±0.26	4.0338±0.25	3.25201
17843296	3.3698±0.55	2.7855±0.07	3.168±0.43	1.99767
17602457	5.1367±1.13	4.6791±0.54	4.9073±0.33	1.71955
17806447	4.5224±0.65	3.9601±0.14	4.2063±0.17	1.78137
17600153	5.2043±0.58	4.603±0.39	4.7012±0.55	1.63485
17605379	6.2005±0.4	5.582±0.09	5.778±0.25	1.72903
17605593	4.9531±0.36	4.2959±0.44	4.5162±0.23	1.71851
17604553	4.0955±0.17	3.4338±0.28	3.4359±0.43	1.52109
17613282	4.4971±0.37	3.8733±0.04	4.0442±0.12	1.69116
17608643	4.7337±0.36	3.9397±1.01	4.0698±0.35	1.48125
17606765	3.6998±0.23	3.0585±0	3.5775±0	2.14947
17601203	3.6856±0.43	3.076±0.04	3.4219±0	1.90616
17601537	3.6856±0.43	3.076±0.04	3.4219±0	1.90616
17604945	4.5179±0.18	3.8629±0.22	4.1379±0.34	1.82977
17602079	4.9228±0.17	4.2754±0.07	5.0749±0.84	2.83429
17607277	3.7156±0.88	3.2528±0.11	3.8003±0.02	2.1895
17606343	5.4378±0.41	4.7818±0.49	4.9007±0.16	1.58712
17604191	7.3713±0.5	6.7712±0.07	7.0781±0.51	1.91286
17653408	5.0414±0.48	4.4402±0.04	4.2967±0.15	1.36122
17605029	4.1029±0.15	3.4542±0.1	3.9397±0.02	2.09767
17604577	5.8811±0.33	5.0809±1.01	5.4345±0.92	1.87886
17600839	6.6375±0.17	5.9089±0.7	6.6446±0.05	2.35843
17802783	4.497±0.45	3.8867±0.2	3.9229±0.04	1.53073
17731942	8.6499±0.09	7.9984±0.11	8.1445±0.4	1.68887
17602821	5.1571±0.43	4.5388±0.22	5.0225±0.23	2.09839
17722027	5.3221±0.2	4.6248±0.57	5.1527±0.09	2.08288
17635715	3.6199±0.67	3.0746±0.15	3.3635±0.07	1.82859
17606755	5.7196±0.56	5.1031±0.49	5.5318±0.14	1.96695
17869474	5.0455±0.38	4.4265±0.15	4.2306±0	1.30614
17605473	5.8785±0.85	5.4026±0.2	5.1067±0.22	1.22323
17713599	4.5684±0.19	3.8826±0.52	4.0619±0.02	1.64444
17605367	3.627±1.16	3.3097±0.19	3.1118±0.04	1.3025
17819477	4.9011±0.23	4.2658±0.07	4.8103±0.07	2.18763
17608711	5.6233±0.6	5.0625±0.13	5.0912±0.74	1.62996
17679518	5.3239±0.28	4.6644±0.43	5.1138±0.16	2.01016
17787130	6.6136±0.57	6.0461±0.06	6.9202±0.39	2.79793
17603649	6.8921±0.3	6.1757±0.74	6.7117±0.17	2.04683
17867493	5.3989±0.52	4.8027±0.31	5.0559±0.28	1.78449
17607963	5.7557±0.09	5.0947±0.34	5.7652±0.13	2.35953
17601067	4.8531±0.38	4.1527±0.74	4.334±0.09	1.59612
17601401	4.8531±0.38	4.1527±0.74	4.334±0.09	1.59612
17817710	3.8699±0.23	3.2388±0.06	3.6661±0	2.01618
17600921	6.0037±0.5	5.4128±0.24	5.1742±0.74	1.3471
17601241	6.0037±0.5	5.4128±0.24	5.1742±0.74	1.3471
17602823	4.1574±0.18	3.5138±0.22	4.3456±0.38	2.69983
17607615	3.7113±0.22	3.0438±0.46	3.1524±0.32	1.59619
17609033	3.7113±0.22	3.0438±0.46	3.1524±0.32	1.59619
17607575	5.1905±0.2	4.5456±0.26	5.4327±0.6	2.87147
17608993	5.1905±0.2	4.5456±0.26	5.4327±0.6	2.87147
17609801	6.7812±0.21	6.1314±0.33	6.8001±0.23	2.36779
17606585	4.0201±0.25	3.3861±0.2	3.3189±0.24	1.43415
17746126	6.7178±0.15	6.0832±0.03	6.6907±0.05	2.28584
17602363	5.6188±0.68	5.0607±0.29	5.3624±0.13	1.83457
17607899	4.1569±0.93	3.6695±0.33	3.748±0.17	1.56906
17833225	3.6428±0.36	3.0288±0.14	3.3296±0.11	1.84632
17605481	8.2209±0.27	7.598±0.06	8.2919±0.18	2.43477
17603639	6.4399±0.74	5.8202±0.81	6.1163±0.01	1.70593
17605797	7.0156±0.35	6.4066±0	6.6638±0.02	1.79291
17608411	5.1282±0.4	4.5242±0.1	4.7297±0.05	1.72803
17719595	4.6524±0.43	4.0435±0.27	4.0159±0.04	1.45948
17775321	4.111±0.39	3.503±0.21	3.9347±0.1	2.01522
17761829	8.1278±0.33	7.4356±0.68	7.1989±0.32	1.21987
17696521	5.5368±0.18	4.875±0.44	5.3401±0.41	2.06369
17880929	4.6752±0.22	4.0233±0.4	4.518±0.2	2.0839
17602093	5.7923±0.17	5.1541±0.24	5.1888±0.15	1.53018
17607739	4.4763±0.85	3.9485±0.64	4.8576±0.37	2.72648
17609157	4.4763±0.85	3.9485±0.64	4.8576±0.37	2.72648
17717673	4.4711±0.42	3.875±0.14	4.1937±0.74	1.99197
17665130	6.5967±0.17	5.9677±0.12	6.6421±0.21	2.40261
17601201	6.0627±0.6	5.4992±0.33	5.7813±0.37	1.83056
17601535	6.0627±0.6	5.4992±0.33	5.7813±0.37	1.83056
17619421	3.8703±0.18	3.2364±0.23	3.86±0.02	2.29599
17602203	6.5381±0.06	5.9036±0.14	6.2824±0.15	1.95079
17724289	8.2141±0.27	7.5908±0.21	7.501±0.32	1.41912
17801865	4.4865±0.54	3.9111±0.28	4.5744±0.62	2.46191
17868781	4.0692±0.19	3.4439±0.13	4.0451±0.31	2.29808
17606451	4.1948±0.39	3.5963±0.07	3.4985±0.15	1.40477
17604703	4.1037±0.65	3.5541±0.23	4.1016±0.81	2.3538
17607161	5.0735±0.6	4.5225±0.06	4.4491±0.17	1.42984
17719993	5.5835±0.09	4.9385±0.32	5.287±0.01	1.88622
17764640	5.6859±0.21	5.045±0.35	5.5843±0.05	2.14803
17674321	4.6363±0.29	4.0266±0.03	3.9462±0.26	1.42999
17674322	4.6363±0.29	4.0266±0.03	3.9462±0.26	1.42999
17836377	5.7863±0.23	5.0932±0.67	5.6679±0.23	2.1326
17826514	8.5425±0.09	7.91±0.18	8.3017±0.03	1.96033
17616918	4.157±0.4	3.567±0.05	3.7052±0.13	1.65349
17611532	6.7191±0.18	6.0962±0.11	6.1173±0.25	1.53154
17605115	3.9277±0.46	3.3443±0.09	3.9629±0.38	2.33984
17602417	8.6362±0.52	8.0547±0.28	8.0592±0.27	1.50404
17693884	3.9234±0.23	3.3081±0.04	3.589±0.23	1.83333
17605595	6.0283±0.3	5.4062±0.3	4.9187±0.03	1.05817
17667476	8.8198±0.05	8.1935±0.04	8.4634±0.13	1.81216
17601979	4.8425±0.58	4.2906±0.14	4.7919±0.45	2.16909
17602061	7.3621±0.13	6.669±0.65	7.3399±0.03	2.27321
17605087	5.3187±0.67	4.7878±0.09	4.9845±0.93	1.90045
17602715	4.9908±0.76	4.4856±0.09	5.048±0.43	2.26151
17609203	6.6529±0.43	6.0666±0.18	6.1975±0.33	1.65713
17751097	5.1551±0.23	4.5298±0.28	4.7826±0.05	1.77067
17601689	5.4701±0.53	4.9124±0.06	5.514±0.28	2.29619
17602251	6.064±0.54	5.4905±0.29	5.4703±0.01	1.46463
17755975	6.3919±0.3	5.74±0.54	6.2512±0.12	2.06827
17601685	6.4697±0.47	5.8624±0.47	6.2324±0.69	1.99821
17622666	5.4926±0.69	4.9638±0.26	5.49±0.52	2.21295
17609241	4.0252±1.02	3.4918±0.9	3.2647±0.14	1.16867
17666384	5.9945±0.18	5.3739±0.17	5.9437±0.06	2.21933
17604301	7.1023±0.27	6.4933±0.15	7.1138±0.38	2.34006
17609727	6.6018±0.67	5.9906±0.7	5.4386±1.34	1.18067
17606219	5.9707±0.4	5.3477±0.46	6.4535±0.31	3.18572
17605495	4.7927±0.38	4.207±0.04	4.1256±0.27	1.42973
17820175	4.3761±0.6	3.8439±0.02	4.4265±0.32	2.27372
17610035	5.5977±0.26	4.9489±0.51	5.6535±0.03	2.36996
17850786	4.9118±0.36	4.274±0.53	4.2878±0.05	1.4643
17603073	5.18±0.48	4.5871±0.37	4.6413±0.04	1.53262
17600261	4.6646±0.39	4.0636±0.32	4.3522±0.02	1.81047
17605469	6.1693±0.36	5.5795±0	6.1691±0.29	2.28088
17606049	6.9487±0.18	6.2402±0.76	6.8735±0.19	2.1842
17606761	4.1089±0.3	3.491±0.34	3.8287±0.62	1.95632
17602049	3.9366±0.47	3.3236±0.53	4.4275±0.13	3.12536
17772383	4.795±0.28	4.188±0.2	4.6926±0.44	2.16766
17621679	4.2399±0.38	3.6526±0.06	3.8499±0.46	1.76339
17604305	6.4334±0.45	5.7026±0.97	5.9556±0.1	1.60573
17810527	8.2944±0.5	7.7147±0.33	7.5157±0.5	1.32855
17748808	7.3608±0.36	6.7652±0.19	6.8565±0.29	1.60733
17649611	5.2778±0.21	4.6695±0.07	5.1071±0.31	2.05459
17603789	3.9188±0.52	3.3646±0.04	3.3081±0.01	1.44209
17606455	4.8219±0.66	4.2978±0.2	4.6744±0.38	1.97213
17609407	7.3854±0.27	6.7498±0.45	7.2117±0.72	2.14122
17604337	6.0134±0.5	5.4537±0.14	5.1663±0.68	1.29537
17606997	4.5699±0.38	3.9811±0.19	4.4695±0.58	2.18045
17600807	3.6563±0.09	3.0425±0.01	3.5928±0.26	2.21503
17609231	6.2386±0.28	5.6262±0.29	5.9766±0.34	1.91882
17808756	5.2162±0.45	4.6227±0.38	4.9545±0.03	1.8553
17604655	6.0399±0.19	5.4299±0.14	5.9836±0.65	2.30925
17604019	5.8936±0.18	5.2095±0.67	5.9226±0.06	2.33231
17603885	4.0431±0.85	3.6004±0.17	4.1823±0.51	2.30919
17607371	3.4733±0.13	2.8623±0.06	3.1856±0.03	1.87611
17604329	7.091±0.6	6.5577±0	6.8848±0.08	1.88328
17713941	4.4526±0.25	3.8522±0.09	4.1048±0.15	1.79043
17868340	4.2957±0.4	3.7083±0.27	4.0122±0.25	1.85043
17787135	5.9799±0.62	5.4135±0.51	5.1147±0.43	1.20843
17832363	9.3648±0.32	8.7747±0.03	9.0987±0.25	1.89155
17608283	5.0406±0.19	4.4336±0.13	4.7233±0.32	1.85252
17756099	6.8192±0.97	6.2171±1.02	7.0656±0.32	2.42437
17713660	4.4058±0.32	3.7902±0.4	4.0366±0.76	1.86855
17726363	4.7912±0.22	4.1891±0.11	4.8818±0.52	2.50032
17604763	4.231±1.1	3.8886±0.41	3.189±0.12	0.906772
17784270	5.1797±0.4	4.5996±0.18	4.7956±0.02	1.71158
17600125	7.5504±0.33	6.9446±0.33	7.0073±0.25	1.55707
17606745	3.9413±0.31	3.3325±0.35	3.6725±0.28	1.88954
17825880	4.9179±0.42	4.3464±0.07	4.7134±0.13	1.93752
17601135	4.6639±0.13	4.0481±0.24	4.4043±0.55	1.97691
17601469	4.6639±0.13	4.0481±0.24	4.4043±0.55	1.97691
17814014	4.693±0.58	4.1635±0.05	4.4891±0.23	1.89122
17805445	6.5495±0.71	6.0386±0.21	6.2454±0.2	1.73053
17882979	6.5495±0.71	6.0386±0.21	6.2454±0.2	1.73053
17643246	7.2686±0.08	6.6525±0.22	6.6549±0.37	1.51846
17603093	6.7853±0.35	6.1975±0.2	6.4414±0.24	1.78032
17603903	7.0602±0.12	6.4468±0.21	5.9374±0.25	1.05624
17606853	3.8522±0.54	3.3094±0	3.312±0.19	1.5093
17608773	4.6379±0.34	3.8905±0.99	3.7974±1.04	1.42078
17607977	4.3314±0.48	3.7632±0.29	4.3346±0.31	2.23185
17697532	4.0441±0.21	3.4264±0.33	3.4426±0.15	1.5017
17600641	7.2593±0.35	6.6686±0.26	6.9934±0.23	1.87518
17610155	7.2593±0.35	6.6686±0.26	6.9934±0.23	1.87518
17601051	6.5315±0.27	5.8735±0.62	6.2997±0.09	1.9269
17601385	6.5315±0.27	5.8735±0.62	6.2997±0.09	1.9269
17692792	6.2619±0.14	5.6328±0.38	5.7443±0.29	1.60873
17619419	5.2621±0.63	4.7511±0.01	4.8512±0.1	1.60956
17808101	4.7575±0.11	4.1481±0.16	4.3173±0.32	1.70266
17755554	7.4166±0.31	6.8286±0.11	6.7681±0.19	1.44281
17774082	3.44±0.55	2.9006±0.18	3.2045±0.21	1.85489
17874787	8.0518±0.17	7.4486±0.13	7.814±0.12	1.93202
17646715	8.2989±0.33	7.7158±0.13	7.9578±0.23	1.7813
17604899	6.412±0.56	5.8574±0.29	6.4315±0.12	2.21401
17600007	7.1109±0.3	6.5263±0.04	7.3346±0.04	2.62664
17600913	5.5763±0.06	4.8871±0.71	5.1576±0.73	1.8168
17601233	5.5763±0.06	4.8871±0.71	5.1576±0.73	1.8168
17880750	5.1391±0.31	4.5435±0.26	5.0287±0.37	2.11653
17676615	4.8871±0.13	4.2866±0.02	4.734±0.02	2.04548
17605923	6.6166±0.39	6.0259±0.35	6.5163±0.28	2.09558
17757696	9.2167±0.1	8.6153±0	8.8077±0.06	1.71475
17600233	3.7474±0.4	3.1786±0.14	3.9585±0.07	2.57123
17602477	6.6798±0.04	6.0677±0.23	6.634±0.67	2.32612
17606655	5.4743±0.11	4.853±0.35	5.4897±0.2	2.30841
17603195	4.9041±0.48	4.3276±0.37	4.7458±0.47	2.02343
17603811	7.6913±0.34	7.0889±0.39	7.5767±0.26	2.08225
17607953	5.4368±0.47	4.8804±0.19	4.9549±0.78	1.69031
17686506	8.4489±0.46	7.8884±0.14	7.8416±0.04	1.44885
17703301	3.8269±0.07	3.212±0.29	3.394±0.03	1.68508
17759412	4.3684±0.34	3.7921±0.1	4.1045±0.26	1.87518
17604177	5.238±0.39	4.6168±0.55	5.5353±0.17	2.74382
17818092	10.4322±0.29	9.7732±0.67	10.401±0.31	2.22198
17684809	4.5777±0.31	3.9997±0.03	4.2486±0.33	1.80534
17601803	5.857±0.26	5.2717±0.01	5.5038±0.48	1.8116
17868060	5.8396±0.08	5.2191±0.35	5.6661±0.09	2.01684
17609631	5.561±0.59	4.9937±0.48	5.2595±0.34	1.77938
17603849	4.2126±0.3	3.5927±0.49	4.2162±0.2	2.25689
17601817	5.4424±0.3	4.8053±0.58	4.9356±0.32	1.59714
17603441	7.9367±0.09	7.3387±0.05	7.5586±0.26	1.76114
17606593	3.9499±0.27	3.3525±0.3	3.7115±0.5	1.96128
17605169	5.3255±0.18	4.7342±0.02	5.3712±0.11	2.33566
17719036	5.8948±0.18	5.2278±0.67	5.9476±0.01	2.34397
17604433	5.994±0.37	5.3365±0.73	6.1192±0.28	2.44639
17711487	6.3287±0.07	5.7157±0.31	6.0292±0.39	1.87539
17840173	4.4388±0.2	3.8508±0.06	4.3382±0.01	2.10204
17808759	3.2193±0.31	2.6427±0.09	2.9301±0.12	1.83204
17698993	4.8695±0.38	4.3055±0.06	4.5571±0.03	1.78519
17759330	10.3557±0.43	9.7956±0.14	10.381±0.08	2.24734
17608537	5.5668±0.18	4.9783±0.02	4.8817±0.16	1.40729
17609993	6.4015±0.19	5.8109±0.14	6.253±0.1	2.03516
17601867	7.0059±0.19	6.4067±0.26	6.8935±0.25	2.10049
17600087	6.8366±0.14	6.1943±0.55	6.7864±0.16	2.18763
17843290	5.0562±0.08	4.4634±0.03	4.9725±0.21	2.14603
17878575	3.8194±0.26	3.2406±0.03	3.6291±0.27	1.9799
17603557	7.7389±0.11	7.1459±0.12	7.9136±0.42	2.60303
17608815	5.4559±0.65	4.9479±0.1	4.8344±0.26	1.39622
17605959	6.7451±0.44	6.1876±0.22	6.9631±0.3	2.58019
17676824	3.7245±0.34	3.1536±0.19	3.2939±0.31	1.66601
17608839	4.254±0.37	3.6643±0.42	4.5552±0.3	2.75327
17603801	5.1729±0.52	4.6455±0.08	4.9072±0.35	1.82347
17602939	7.2352±0.11	6.6454±0	7.2094±0.19	2.2269
17879492	6.1532±0.24	5.5741±0.03	6.0275±0.22	2.06581
17602817	4.3402±0.39	3.7634±0.35	3.0177±0.05	0.881531
17618069	4.5655±0.54	4.0405±0.01	4.4948±0.13	2.05943
17608575	3.9265±0.36	3.3576±0.23	3.3658±0.74	1.59904
17698125	9.9707±0.13	9.3861±0.03	9.8903±0.01	2.12732
17600141	6.5003±0.67	6.0156±0.22	6.2222±0.44	1.76151
17604841	3.6935±0.55	3.1734±0.13	3.042±0.18	1.37201
17602767	6.0768±1.45	5.9005±0.75	6.3191±0.35	1.90262
17607087	3.8764±0.49	3.3213±0.38	3.8562±0.18	2.14506
17684914	6.9542±0.21	6.363±0.28	6.4607±0.37	1.61577
17658502	4.1566±0.1	3.4797±0.74	3.7886±0.14	1.74651
17674357	8.2018±0.25	7.6167±0.27	7.3816±0.35	1.28206
17692403	4.0496±0.4	3.4999±0.13	4.0331±0.31	2.19035
17684950	3.3027±0.22	2.7211±0.2	2.8259±0.03	1.60531
17608541	6.2426±0.13	5.65±0.26	6.5552±0.07	2.78869
17869469	4.3014±0.21	3.727±0.02	3.8346±0.41	1.64806
17600843	7.0659±0.63	6.5508±0.36	6.3844±0.46	1.34954
17628455	5.2386±0.53	4.7215±0	4.5392±0.26	1.33246
17830001	6.8941±0.25	6.3205±0.17	6.7241±0.06	1.97838
17607637	3.6564±1.32	3.4808±0.14	3.2011±0.6	1.28703
17609055	3.6564±1.32	3.4808±0.14	3.2011±0.6	1.28703
17602225	4.6047±0.8	4.1704±0.19	3.9893±0.07	1.31815
17795999	6.6524±0.2	6.0665±0.27	6.7569±0.11	2.40367
17603009	5.7986±0.04	5.2126±0.15	6.0213±0.01	2.62036
17609707	6.4509±0.04	5.8575±0.26	5.7686±0.06	1.39978
17774244	3.9071±0.3	3.3219±0.37	3.5497±0.48	1.77616
17607607	4.338±0.23	3.7655±0.14	4.3905±0.08	2.30981
17609025	4.338±0.23	3.7655±0.14	4.3905±0.08	2.30981
17697685	6.2682±0.28	5.5432±0.98	5.9013±0.52	1.77638
17673475	4.8133±0.32	4.2365±0.34	4.3842±0.22	1.64773
17608499	4.4339±0.9	4.004±0.47	3.4478±0.11	0.994741
17602643	5.4975±0.25	4.9296±0.12	5.0644±0.34	1.6673
17603947	6.5849±0.68	6.0931±0.2	6.4089±0.83	2.01519
17604311	6.7976±0.27	6.2316±0.13	7.042±0.48	2.69771
17859860	4.9614±0.02	4.3757±0.21	4.8315±0.4	2.08644
17600173	5.6566±0.31	5.0434±0.58	5.1589±0.24	1.57261
17605985	5.3187±0.35	4.7538±0.3	4.7761±0.1	1.50854
17609939	4.3032±0.72	3.8467±0.16	4.0713±0.33	1.76958
17606981	4.1165±0.82	3.705±0	3.4097±0.01	1.22235
17603271	7.0112±0.28	6.3992±0.56	7.0216±0.19	2.23372
17608633	5.5211±0.96	5.1188±0.2	3.8711±0.19	0.631521
17606979	6.0137±0.56	5.5129±0.09	6.3362±0.21	2.66533
17602301	5.089±0.58	4.5846±0.13	4.5619±0.04	1.47392
17608069	4.9094±1.02	4.4861±0.57	4.6552±0.37	1.65012
17600809	6.9265±0.26	6.353±0.28	6.1694±0.32	1.32509
17606107	5.333±0.41	4.7402±0.57	5.2209±0.69	2.13237
17601553	5.7178±0.1	5.1436±0.1	5.3843±0.42	1.808
17826922	5.65±0.24	5.0779±0.25	5.3711±0	1.82389
17699104	4.7022±0.3	4.1464±0.12	4.4861±0.21	1.90533
17849524	3.832±0.35	3.2822±0.12	3.5456±0.11	1.79975
17606223	5.0383±0.88	4.6042±0.46	5.1473±0.25	2.14816
17883107	4.2458±0.21	3.6814±0	3.3512±0.19	1.1982
17880579	7.2698±0.11	6.4812±1.15	7.1894±0.24	2.12179
17608269	5.3666±0.38	4.8147±0.27	5.0908±0.07	1.80143
17863391	4.5854±0.55	4.0729±0.21	4.0985±0.48	1.56084
17882789	4.7571±0.3	4.1672±0.47	4.1994±0.01	1.49441
17601585	6.3593±0.58	5.8585±0.05	6.6391±0.63	2.69795
17792089	4.2024±0.92	3.8401±0.07	3.616±0.25	1.29275
17734724	6.4871±0.2	5.902±0.36	6.3391±0.03	2.00015
17605471	5.5718±0.18	4.998±0.24	5.6372±0.04	2.32122
17604887	6.5897±0.47	6.0608±0.2	7.0093±0	2.88087
17838859	5.9542±0.32	5.4057±0.05	5.7195±0.18	1.87152
17808722	6.6222±0.47	6.0801±0.35	6.1007±0.07	1.50092
17637898	4.6493±0.37	4.1097±0.06	4.2744±0.09	1.68221
17674317	6.6261±0.14	6.023±0.46	4.3136±1.56	0.584294
17616000	6.0355±0.5	5.4351±0.7	5.3844±0.81	1.47628
17605219	4.5586±1.05	4.1943±0.42	4.5541±0.84	2.0453
17609189	8.3291±0.34	7.7062±0.68	8.368±0.37	2.28461
17811258	4.9809±0.26	4.4035±0.35	4.4008±0.25	1.48633
17611071	8.2631±0.33	7.7191±0.03	7.5347±0.23	1.3285
17629002	4.0784±0.47	3.5617±0.02	3.4053±0.01	1.34587
17712198	4.2603±0.36	3.721±0.05	4.5183±0.23	2.62228
17831502	4.8687±0.22	4.31±0.05	4.6951±0	1.95835
17607791	5.243±0.11	4.6469±0.41	5.1098±0.3	2.04744
17607843	5.243±0.11	4.6469±0.41	5.1098±0.3	2.04744
17670637	6.3761±0.15	5.812±0.01	6.3927±0.78	2.40909
17607355	4.9482±0.81	4.3997±0.88	5.1239±0.76	2.42572
17608751	7.2526±0.41	6.6975±0.37	7.2686±0.02	2.19196
17600213	7.5676±0.06	6.9346±0.62	6.9535±0.36	1.4747
17607075	4.893±0.4	4.3561±0.17	4.8356±0.32	2.10897
17607329	5.5452±0.7	5.0041±0.71	5.8101±0.35	2.50818
17602533	3.6486±0.61	3.1352±0.42	3.3642±0.23	1.73253
17699108	6.5071±0.34	5.9668±0.11	6.2409±0.03	1.81132
17605565	7.1718±0.52	6.6548±0.27	7.4217±0.24	2.54749
17882907	3.9143±0.64	3.4392±0.24	3.6629±0.19	1.74692
17611062	6.8986±0.18	6.3383±0.08	7.0125±0.24	2.40805
17605017	4.3377±0.72	3.8839±0.2	4.3079±0.11	2.00514
17871613	6.1548±0.19	5.5972±0.06	6.0191±0.05	2.00941
17881717	7.5226±0.32	6.921±0.59	7.6209±0.09	2.33928
17603293	5.7849±0.41	5.2431±0.27	5.5468±0.63	1.92456
17645304	4.5638±0.12	4.0018±0.06	3.9495±0.28	1.45947
17608095	4.9727±0.43	4.4465±0.19	4.5389±0.09	1.59383
17791978	3.9784±0.06	3.4145±0.04	3.3663±0.05	1.45073
17755347	6.684±0.36	6.0991±0.54	6.5009±0.12	1.91814
17858093	3.5309±0.11	2.9698±0.01	3.3234±0.03	1.91691
17607645	4.7348±0.21	4.1799±0.07	4.3377±0.07	1.67319
17609063	4.7348±0.21	4.1799±0.07	4.3377±0.07	1.67319
17605135	4.6514±0.61	4.0849±0.71	4.5364±0.77	2.07204
17604933	4.0966±0.29	3.5534±0.07	3.667±0.55	1.68194
17604369	7.4318±0.14	6.8737±0.01	6.8944±0.21	1.52947
17868123	7.1009±0.34	6.5643±0.08	6.8183±0.06	1.78837
17600521	4.9042±0.24	4.3098±0.51	5.0279±0.16	2.39985
17600091	6.3925±0.24	5.8337±0.23	5.9802±0.32	1.66923
17693103	3.4085±0.06	2.8456±0.12	3.134±0.05	1.82949
17766921	5.9124±0.11	5.3468±0.2	5.7905±0	2.02991
17601617	6.916±0.54	6.3772±0.53	7.1702±0.05	2.51502
17772035	6.3219±0.57	5.8254±0.28	6.2239±0.27	1.97546
17640795	5.2822±0.23	4.7269±0.19	5.266±0.34	2.2006
17832215	3.2348±0.32	2.6917±0.18	2.8867±0.23	1.72119
17645664	5.615±0.34	5.0788±0.14	5.6371±0.45	2.25789
17749162	4.2569±0.14	3.6987±0.12	4.2754±0.45	2.28896
17601209	5.4293±0.48	4.9201±0.09	5.3221±0.23	1.99291
17601543	5.4293±0.48	4.9201±0.09	5.3221±0.23	1.99291
17603099	6.9025±0.22	6.3252±0.41	6.396±0.21	1.55242
17607661	6.3827±0.26	5.8184±0.35	6.5612±0.18	2.48315
17609079	6.3827±0.26	5.8184±0.35	6.5612±0.18	2.48315
17772066	4.4932±0.17	3.8957±0.51	3.6834±0.63	1.31514
17604335	6.2919±0.46	5.7818±0	5.3681±0.4	1.14792
17788912	6.8401±0.09	6.2774±0.17	6.9564±0.12	2.39687
17606349	3.9719±0.71	3.5239±0.2	3.6823±0.41	1.70032
17665114	4.8647±0.52	4.3513±0.27	4.4059±0.33	1.56466
17828502	5.7072±0.31	5.1379±0.43	5.7094±0.55	2.26022
17767823	4.0691±0.16	3.5139±0.13	3.6356±0.1	1.6308
17664996	7.3005±0.33	6.7666±0.03	6.9648±0.01	1.72068
17881711	3.9491±0.27	3.3877±0.34	3.6275±0	1.74701
17605583	6.1472±0.66	5.6602±0.37	5.5378±0.42	1.38437
17601205	5.6858±0.5	5.1737±0.25	5.5557±0.48	1.995
17601539	5.6858±0.5	5.1737±0.25	5.5557±0.48	1.995
17868030	6.5349±0.22	5.981±0.22	6.201±0	1.7369
17726835	4.0325±0.78	3.6225±0.05	3.7966±0.01	1.69189
17609877	6.2059±0.55	5.5644±0.95	5.7767±1.25	1.86804
17605419	3.9458±0.57	3.4338±0.38	3.2863±0.02	1.33154
17817473	7.4016±0.11	6.8469±0.07	7.1705±0.11	1.87905
17609419	5.7184±0.96	5.2858±0.58	5.1797±0.55	1.38769
17797352	6.445±0.06	5.8855±0.16	6.2955±0.03	1.98731
17845633	5.0689±0.25	4.5245±0.14	5.2501±0.14	2.48011
17825853	4.0949±0.32	3.5588±0.17	3.6172±0.09	1.55793
17609251	5.9599±0.18	5.4053±0.21	5.7551±0.56	1.97425
17605763	5.1899±0.34	4.6014±0.59	4.5968±0.47	1.47305
17607009	7.8996±0.33	7.3526±0.33	7.0832±0	1.228
17606601	6.5388±0.06	5.9791±0.19	5.9374±1.08	1.65894
17607245	6.5388±0.06	5.9791±0.19	5.9374±1.08	1.65894
17603533	5.361±0.64	4.6411±1.25	4.5668±1.06	1.35694
17600219	5.5774±0.73	4.9037±1.2	4.9598±0.73	1.4103
17606045	4.5096±0.61	4.0418±0.18	3.7641±0.49	1.26825
17699830	3.9049±0.88	3.5102±0.24	4.0129±0.06	2.11199
17647720	5.1339±0.45	4.6129±0.26	4.3014±0.61	1.25261
17609233	3.5599±0.32	3.0182±0.28	2.678±0.11	1.17545
17606993	7.3083±0.62	6.8187±0.38	7.7068±0.14	2.73434
17600083	5.2015±0.81	4.8024±0.02	4.36±0.12	1.10564
17607949	5.4141±0.28	4.8795±0.06	5.1905±0.37	1.89102
17613478	5.8734±0.23	5.3012±0.44	5.9692±0.21	2.34228
17835135	8.1453±0.28	7.6123±0.03	7.7986±0.06	1.70728
17600075	4.4211±1.37	4.336±0.17	3.9922±0.1	1.1793
17609517	5.2922±0.46	4.7929±0	5.2132±0.67	2.11694
17605211	5.4284±0.29	4.8531±0.52	5.2801±0.24	1.96665
17702038	5.473±0.21	4.9001±0.44	5.0844±0.23	1.67569
17606047	6.5688±0.42	6.035±0.37	5.8942±0.91	1.47446
17850988	3.9926±0.3	3.4611±0.15	3.7032±0.23	1.78032
17656184	5.6395±0.46	5.1301±0.19	5.5107±0.04	1.945
17609445	6.4739±0.24	5.9202±0.33	5.6872±0.55	1.30585
17774182	4.8585±0.29	4.3292±0.07	4.7687±0.2	2.04256
17694630	3.6275±0.59	3.1473±0.22	3.0185±0.15	1.36799
17699246	7.673±0.49	7.171±0.21	7.4999±0.61	1.95723
17832362	9.6451±0.03	9.0977±0.04	9.5298±0.1	2.02554
17731381	5.0528±0.55	4.5588±0.35	4.8602±0.44	1.86301
17662642	6.6758±0.1	6.1094±0.36	6.7405±0.22	2.30119
17600337	5.5807±0.52	5.0983±0.08	5.3189±0.05	1.74699
17686831	3.9756±0.44	3.4659±0.2	3.7712±0.14	1.84873
17825500	6.1716±0.39	5.6596±0.04	5.7032±0.24	1.5568
17822878	6.2848±0.94	5.8764±0.46	6.8465±0.21	2.87943
17792015	4.1839±0.18	3.6209±0.38	3.7441±0.29	1.62191
17602455	3.4181±0.43	2.8964±0.34	3.2948±0.72	2.07052
17719222	4.3344±0.13	3.7615±0.43	4.1129±0.07	1.8724
17601119	4.9476±0.38	4.4319±0.19	4.5852±0.02	1.66074
17601453	4.9476±0.38	4.4319±0.19	4.5852±0.02	1.66074
17600995	5.8036±0.08	5.2612±0.02	5.7575±0.03	2.11614
17601329	5.8036±0.08	5.2612±0.02	5.7575±0.03	2.11614
17645287	6.0454±0.31	5.5039±0.35	6.335±0.39	2.67971
17859416	4.6068±0.33	4.0792±0.25	4.3177±0.28	1.77314
17723951	7.6872±0.16	7.1458±0.15	7.4334±0.17	1.83202
17683917	3.4871±0.37	2.9598±0.3	3.0801±0.13	1.61626
17607799	5.8139±0.56	5.3359±0.06	5.8852±0.39	2.23412
17607851	5.8139±0.56	5.3359±0.06	5.8852±0.39	2.23412
17817040	4.057±0.42	3.527±0.41	3.9043±0.12	1.91287
17872369	4.2508±0.71	3.825±0.22	3.8026±0	1.46845
17709019	5.3604±0.04	4.8129±0.18	5.096±0.07	1.81926
17720694	3.3131±0.39	2.8022±0.14	2.9328±0.12	1.64107
17882879	3.3131±0.39	2.8022±0.14	2.9328±0.12	1.64107
17604813	5.7255±0.17	5.1758±0.29	5.1753±0.52	1.53207
17603667	3.9276±0.42	3.4278±0.01	3.8456±0.39	2.04084
17608871	6.515±0.39	5.9996±0.25	6.8599±0.32	2.73594
17600563	5.2986±0.5	4.7773±0.49	4.7011±0.5	1.42384
17610077	5.2986±0.5	4.7773±0.49	4.7011±0.5	1.42384
17869457	7.6269±0.33	7.1105±0	7.4543±0.21	1.91401
17824880	4.4204±0.08	3.8816±0.03	4.4789±0.15	2.27538
17605439	4.2476±0.5	3.7692±0.03	3.9453±0.88	1.85519
17743839	3.7434±0.44	3.2416±0.16	3.1773±0.11	1.43255
17654078	4.0613±0.42	3.5176±0.5	3.8753±0.14	1.87084
17683125	3.5035±0.6	3.0439±0.06	3.3418±0.2	1.85226
17608043	7.0679±0.53	6.5783±0.3	7.1294±0.4	2.21503
17605973	6.2956±0.27	5.7711±0.09	6.7239±0.14	2.90688
17603061	6.0801±0.26	5.537±0.34	6.1324±0.22	2.24865
17604725	8.0734±0.17	7.5346±0.2	7.9314±0	1.96512
17602021	4.0242±0.65	3.5257±0.61	3.6969±0.14	1.61963
17602449	6.1516±0.39	5.6449±0.14	5.8526±0.27	1.74321
17606673	6.3875±0.48	5.8887±0.24	6.0754±0.26	1.70957
17607723	4.9298±0.49	4.445±0.1	4.5839±0.22	1.65947
17609141	4.9298±0.49	4.445±0.1	4.5839±0.22	1.65947
17600367	6.2585±0.38	5.7403±0.29	6.2403±0.33	2.12878
17606863	9.645±0.2	9.1125±0.15	9.6592±0.05	2.18592
17600539	4.3189±0.1	3.7796±0.14	4.09±0.5	1.9109
17610053	4.3189±0.1	3.7796±0.14	4.09±0.5	1.9109
17606187	6.1945±0.96	5.671±1.01	5.7632±0.39	1.44905
17601945	6.7151±0.52	6.2332±0.16	6.6976±0.22	2.07508
17872844	5.109±0.2	4.5588±0.36	4.928±0.19	1.91535
17787768	4.5389±0.13	4.0038±0.1	4.1464±0.08	1.65515
17601681	5.5385±0.51	5.052±0.2	5.1217±0.43	1.60227
17711454	7.6507±0.15	7.118±0.08	7.5703±0.1	2.05307
17732724	5.3976±0.12	4.8338±0.42	4.5513±0.83	1.30956
17603173	3.9565±0.31	3.4087±0.44	3.8688±0.33	2.04189
17648012	4.9832±0.38	4.4761±0.12	4.5481±0.06	1.57477
17871401	4.3274±0.66	3.8935±0.12	3.9496±0.24	1.56791
17844885	3.3769±0.16	2.8461±0.04	2.8312±0	1.48427
17735096	6.1995±0.19	5.6703±0.08	5.8615±0.19	1.7184
17830698	6.1995±0.19	5.6703±0.08	5.8615±0.19	1.7184
17605937	6.4547±0.7	6.0328±0.2	6.3855±0.03	1.90645
17873700	3.9194±0.08	3.3815±0.15	3.5677±0.03	1.70239
17603929	7.1592±0.19	6.6308±0.09	7.0932±0.15	2.07
17600599	7.1585±0.33	6.6429±0.16	6.1509±0.12	1.06515
17610113	7.1585±0.33	6.6429±0.16	6.1509±0.12	1.06515
17868861	6.674±0.16	6.1431±0.11	6.911±0.06	2.5519
17604585	3.7848±0.46	3.2653±0.44	4.0838±0.14	2.59038
17606405	4.9735±0.67	4.5406±0.19	4.816±1.19	2.12639
17719104	6.5859±0.28	6.0518±0.32	6.2185±0.94	1.843
17837071	5.2487±0.32	4.6059±0.89	5.0875±0.21	1.91973
17608143	6.5871±0.35	6.0774±0.16	6.2406±0.31	1.69342
17608267	7.3447±0.21	6.7209±0.77	7.0094±0.28	1.72402
17648370	4.2822±0.25	3.7629±0.01	3.9588±0.18	1.72501
17670116	8.0769±0.2	7.5521±0.09	7.7981±0.07	1.77838
17808099	4.3409±0.17	3.7429±0.65	4.3032±0.14	2.10983
17803172	5.818±0.05	5.2176±0.63	5.8319±0	2.18973
17605015	4.8705±0.49	4.3852±0.21	4.7135±0.33	1.89793
17605671	5.7577±0.22	5.2367±0.01	5.6124±0.51	2.00656
17778750	7.3283±1.46	7.184±0.92	7.7493±1.33	2.45065
17784202	4.9398±0.05	4.3986±0.25	4.8673±0.06	2.06091
17744784	5.5434±0.23	5.0136±0.26	5.065±0.2	1.54904
17852156	9.4998±0.19	8.9778±0.02	9.2329±0.07	1.79106
17605223	6.0484±0.2	5.5235±0.16	5.764±0.59	1.8417
17698555	4.1402±0.23	3.6184±0.15	3.6138±0.55	1.54555
17609255	6.2211±0.25	5.6762±0.42	5.8765±0.49	1.73661
17800724	4.6431±0.24	4.1148±0.27	4.1733±0.29	1.56368
17786445	5.6247±0.38	5.1223±0.22	5.2873±0.06	1.67228
17606607	6.131±0.5	5.6477±0.3	5.9733±0.18	1.86743
17607251	6.131±0.5	5.6477±0.3	5.9733±0.18	1.86743
17876019	3.5219±0.29	3.0097±0.16	3.7043±0.09	2.42238
17601613	4.9837±0.44	4.3615±0.92	5.0534±0.23	2.20783
17603599	5.2618±0.41	4.6906±0.7	4.8785±0.1	1.61444
17784573	4.091±0.43	3.5787±0.42	3.3937±0.46	1.3242
17601059	5.3235±0.07	4.792±0.21	5.0061±0.09	1.73302
17601393	5.3235±0.07	4.792±0.21	5.0061±0.09	1.73302
17607099	5.5411±0.4	5.0343±0.32	5.1922±0.1	1.65569
17861308	7.1802±0.01	6.6544±0.07	6.9464±0.07	1.83662
17715648	5.3537±0.11	4.8276±0.15	5.7849±0.55	3.01282
17605667	6.9322±0.36	6.4152±0.35	6.7236±0.3	1.8498
17668408	4.9236±0.35	4.3858±0.5	5.0079±0.16	2.24899
17737299	4.1744±0.41	3.6896±0.06	3.8578±0.06	1.6854
17607141	7.5396±0.13	6.8339±1.06	7.4672±0.33	2.07352
17829843	3.9604±0.4	3.4653±0.21	3.4277±0.09	1.45475
17853789	5.4552±0.1	4.9276±0.18	5.2583±0.29	1.89812
17822906	5.5114±0.97	5.1846±0.18	5.1541±1.3	1.77039
17605291	4.6396±0.48	4.1516±0.32	4.462±0.17	1.84377
17605259	7.1812±0.35	6.6859±0.07	7.2182±0.08	2.16993
17665497	4.1396±0.6	3.6588±0.51	3.9222±0.27	1.76193
17607143	7.5052±0.27	6.9995±0.04	7.5442±0.14	2.19298
17608501	3.3759±0.38	2.8839±0.16	3.5402±0.3	2.38224
17604359	7.0706±0.24	6.5549±0.21	6.9947±0.24	2.03849
17602867	6.983±0.08	6.4602±0.13	6.7487±0.66	1.92489
17792100	3.7431±0.37	3.2309±0.37	3.2112±0.03	1.45563
17851021	6.1616±0.18	5.6325±0.3	6.108±0.26	2.07887
17825930	7.5231±0.55	7.0117±0.59	7.1765±0.25	1.62573
17606177	5.5124±0.06	4.9931±0.03	4.9152±0.3	1.4365
17602069	4.2007±0.24	3.6664±0.4	4.3542±0.47	2.43433
17607477	5.7024±0.15	5.1887±0.02	5.4008±0.36	1.76437
17608895	5.7024±0.15	5.1887±0.02	5.4008±0.36	1.76437
17785934	4.1514±0.79	3.783±0.01	3.6764±0.27	1.40552
17793478	8.4827±0.04	7.8505±0.82	8.4314±0	2.0733
17607285	5.0532±0.03	4.523±0.26	4.8441±0.36	1.8869
17601625	3.4222±0.35	2.9322±0.02	3.4449±0.19	2.14877
17821558	5.2617±0.08	4.7376±0.2	4.9792±0.26	1.77937
17609847	5.2604±0.18	4.7336±0.31	5.0892±0.73	2.01956
17744454	4.0435±0.4	3.5643±0.01	3.618±0.15	1.56131
17714181	5.8324±0.25	5.33±0.01	5.7346±0.16	1.99134
17608083	5.0983±0.2	4.5803±0.25	4.4796±0.26	1.39999
17789849	5.7257±0.43	5.2303±0.34	5.4912±0.11	1.77445
17600203	6.808±0.47	6.3444±0.03	6.1736±0.91	1.46697
17633915	6.098±0.1	5.5704±0.28	6.0005±0.03	2.0019
17604349	5.6145±0.15	5.1014±0.13	5.8876±0.48	2.65302
17609919	4.5148±1.23	4.3686±0.06	4.2859±0.3	1.43107
17879499	5.3546±0.47	4.8847±0.13	4.9966±0.6	1.68809
17873356	5.2003±0.28	4.6729±0.43	5.0564±0.15	1.9201
17606777	5.0514±0.15	4.4873±0.57	5.194±0.51	2.43167
17606183	5.8681±0.28	5.3255±0.52	5.6171±0.18	1.78565
17883055	7.9605±0.07	7.4233±0.37	7.7151±0.46	1.85308
17602833	4.0907±0.66	3.6246±0.51	3.8462±0.32	1.71549
17610316	3.4613±0.3	2.9675±0.09	2.9869±0.07	1.51978
17817895	4.3616±0.23	3.8598±0.08	4.3896±0.02	2.1642
17603833	5.5655±0.84	5.1807±0.28	4.2527±0.13	0.782391
17600601	6.1797±0.83	5.8157±0.23	5.6665±0.09	1.34536
17610115	6.1797±0.83	5.8157±0.23	5.6665±0.09	1.34536
17608489	4.5835±0.55	4.0872±0.53	4.1568±1.04	1.72559
17794666	3.2616±0.33	2.7738±0.02	3.0608±0.39	1.86408
17607983	4.0742±0.27	3.5788±0.04	3.5902±0.34	1.53284
17609441	3.8841±0.2	3.3809±0.02	3.2886±0.16	1.41116
17752109	4.9894±0.26	4.4916±0.01	4.7013±0.07	1.73564
17607753	6.6408±0.43	6.1651±0.15	6.24±0.34	1.59819
17609171	6.6408±0.43	6.1651±0.15	6.24±0.34	1.59819
17808432	4.1094±0.31	3.6085±0.25	3.6939±0.01	1.57935
17822889	8.0789±0.12	7.5603±0.24	7.7656±0.56	1.78193
17806133	3.6612±0.29	3.1687±0	3.337±0.04	1.68582
17872523	4.013±0.29	3.5172±0.15	3.7816±0.19	1.80416
17787086	3.6076±0.2	3.0919±0.28	3.7123±0.08	2.28598
17603325	6.3008±0.56	5.7954±0.61	6.3504±0.13	2.11237
17605829	4.4059±0.35	3.9111±0.27	4.1782±0.18	1.79654
17607937	3.3847±0.51	2.8976±0.47	3.1736±0.16	1.77344
17823289	4.1253±0.36	3.6255±0.33	4.016±0.28	1.95811
17604779	6.6521±0.43	6.1095±0.67	6.2802±0.12	1.60427
17606091	5.9801±0.38	5.4075±0.75	5.7932±0.22	1.84447
17736838	6.8766±0.21	6.3583±0.33	6.5577±0.38	1.72926
17601895	6.1461±0.68	5.7471±0.09	5.9356±0.07	1.70852
17732723	7.9229±0.07	7.3732±0.49	7.6232±0.16	1.73796
17747131	3.6178±0.28	3.1266±0.09	3.288±0.2	1.68393
17868049	4.9828±0.53	4.5368±0.07	5.0383±0.01	2.12226
17882967	3.7659±0.3	3.2779±0.05	3.6533±0.56	2.01992
17600759	6.4822±0.16	5.9688±0.25	5.778±0.59	1.35928
17822884	8.0504±0.38	7.5774±0.01	8.4803±0.23	2.82239
17826856	5.7231±0.19	5.222±0.11	5.4367±0.11	1.7407
17606175	6.4858±0.74	6.0689±0.5	6.9382±0.11	2.66292
17602961	3.8833±0.43	3.3604±0.57	3.5191±0.22	1.62021
17662377	6.5012±0.28	6.0131±0.01	6.1905±0.01	1.69627
17650984	6.0726±0.1	5.5681±0.06	5.5628±0.68	1.57796
17608315	6.8418±0.09	6.3339±0.14	6.2853±0.43	1.47909
17788408	5.1012±0.22	4.6031±0.13	5.055±0.2	2.05717
17792086	5.2526±0.1	4.7416±0.21	4.941±0.04	1.71361
17605283	5.7581±1.09	5.4709±0.37	5.6456±0.57	1.73097
17608255	6.96±0.51	6.5075±0.23	7.1105±0.12	2.26798
17791993	4.5303±0.1	4.0264±0.09	4.1325±0.09	1.61463
17603779	6.3084±0.29	5.7936±0.41	6.1904±0.84	2.10092
17815607	5.5742±0.05	5.0509±0.33	6.122±0.05	3.1111
17714890	4.3023±0.51	3.8395±0.32	3.5657±0.18	1.23079
17690950	7.6525±0.26	7.1634±0.06	7.2009±0.13	1.54177
17872104	4.2714±0.3	3.7852±0.11	4.0734±0.43	1.86958
17602519	5.757±0.58	5.3249±0.13	5.5719±0.5	1.82944
17674307	7.5454±0.45	7.0607±0.39	7.116±0.17	1.53554
17607713	5.0202±0.27	4.532±0.09	4.4151±0.25	1.39264
17609131	5.0202±0.27	4.532±0.09	4.4151±0.25	1.39264
17608235	4.662±0.5	4.1655±0.52	4.5975±0.04	1.9595
17604181	5.8253±0.56	5.344±0.51	5.2637±1.22	1.62957
17844986	8.4566±0.3	7.9681±0.19	8.0179±0.32	1.56551
17854623	4.2639±0.21	3.769±0.12	4.0831±0.41	1.90001
17606371	7.0474±0.31	6.5676±0.02	7.3413±0.01	2.56445
17796289	4.3159±0.55	3.8629±0.32	4.4909±0.14	2.29519
17604027	5.8355±0.22	5.291±0.56	5.6147±0.01	1.80805
17604603	4.3224±0.43	3.8284±0.45	4.7218±0.73	2.89909
17607491	3.1852±0.69	2.7974±0.09	2.8686±0.04	1.57465
17608909	3.1852±0.69	2.7974±0.09	2.8686±0.04	1.57465
17602065	5.4484±0.84	5.1127±0.02	5.5422±0.2	2.0301
17781035	5.3567±0.2	4.8649±0.07	5.2783±0.15	2.00184
17609973	3.5846±0.57	3.1506±0.16	3.5797±0	2.01331
17604421	4.4379±0.65	3.9066±0.84	4.5174±0.99	2.35988
17600911	5.3659±0.11	4.8524±0.31	5.1774±0.25	1.87131
17601231	5.3659±0.11	4.8524±0.31	5.1774±0.25	1.87131
17606537	4.7731±0.47	4.3202±0.17	4.3684±0.23	1.55563
17602435	7.6536±0.32	7.157±0.36	7.393±0.42	1.77746
17782472	4.544±0.55	4.1166±0.11	4.529±0.14	1.99809
17600757	5.9687±0.22	5.4561±0.38	5.9306±0.72	2.17571
17868131	7.4066±0.15	6.9057±0.2	7.072±0.28	1.69137
17634774	3.9308±0.4	3.4672±0.07	4.1377±0.02	2.38597
17609369	7.3218±0.52	6.8735±0.3	7.0352±0.33	1.6817
17737000	4.493±0.56	4.0308±0.44	4.3046±0.59	1.84651
17679562	4.0376±0.24	3.5468±0.17	3.8383±0.3	1.84867
17811547	5.8452±0.3	5.3338±0.44	5.976±0.47	2.35032
17632156	4.2016±0.22	3.711±0.14	4.1957±0.12	2.09784
17600467	6.8024±0.25	6.2989±0.34	6.0663±0.74	1.34228
17608487	6.1583±0.2	5.6064±0.61	5.4934±0.5	1.36736
17780391	4.7191±0.45	4.2128±0.57	4.2479±0.04	1.47869
17741629	4.1816±0.32	3.7018±0.17	3.8528±0.38	1.68857
17607467	7.1283±0.13	6.5847±0.54	6.6951±0.22	1.57321
17602405	5.6286±0.84	5.2587±0.35	5.1122±1.03	1.50967
17833256	6.6447±0.28	6.1645±0.1	6.3525±0.24	1.71817
17673023	6.6766±0.27	6.1924±0.17	6.2319±0.36	1.56001
17752002	3.4057±0.21	2.9122±0.2	3.2298±0.08	1.8617
17877585	3.8055±0.31	3.3288±0.1	3.8769±0.53	2.26416
17826516	5.1116±0.44	4.6516±0.18	4.7984±0.21	1.66318
17795638	3.6868±0.3	3.2113±0.04	3.6926±0.41	2.13595
17601675	5.7904±0.41	5.327±0.15	5.7518±0.41	2.04892
17634998	9.7607±0.07	9.266±0.04	9.4319±0.04	1.68277
17600209	6.8268±0.5	6.3807±0.17	6.4507±0.31	1.58773
17793209	4.7295±0.09	4.2334±0.13	4.5853±0.07	1.91162
17603051	3.6865±0.74	3.3141±0.25	3.5032±0.63	1.77938
17601961	5.8461±0.52	5.4026±0.17	5.9362±0.65	2.27395
17815584	4.4859±0.25	3.9952±0.24	4.2172±0	1.73735
17717103	5.0806±0.54	4.5246±0.89	4.8754±0.03	1.7436
17789614	6.4393±0.22	5.9558±0.06	6.3168±0.16	1.93158
17807269	4.1374±0.59	3.7161±0.23	3.8231±0.38	1.63331
17601877	6.4198±0.31	5.9205±0.4	6.2378±0.21	1.84316
17603047	5.4104±0.26	4.8998±0.44	5.4435±0.12	2.14077
17692381	3.9536±0.29	3.4723±0.2	3.7877±0.18	1.86414
17602387	6.1995±0.48	5.729±0.42	6.0273±0.14	1.8106
17605765	7.9224±0.2	7.4382±0.04	7.7782±0.17	1.90512
17863420	3.9891±0.23	3.5082±0.08	3.8427±0.08	1.89167
17602565	5.9831±0.29	5.4735±0.46	5.2445±0.01	1.24772
17789380	5.8857±0.58	5.4688±0.02	6.0365±0.19	2.23269
17605093	6.8102±0.14	6.3233±0.03	7.4506±0.39	3.33524
17609245	5.5377±0.4	5.0746±0.24	5.0282±0.35	1.4642
17803983	3.2633±0.33	2.7993±0.03	3.0078±0.07	1.73393
17752703	5.7214±0.09	5.221±0.26	5.6142±0.14	1.95847
17601671	5.5425±0.43	5.0944±0.09	6.0909±0.24	3.00974
17603985	3.1341±0.58	2.7202±0.11	2.6077±0.28	1.39843
17606615	4.6976±0.8	4.2934±0.5	4.6689±0.32	1.91187
17607259	4.6976±0.8	4.2934±0.5	4.6689±0.32	1.91187
17804242	4.6475±0.78	4.212±0.74	3.944±0.02	1.1679
17607187	6.7199±0.54	6.1809±0.81	6.4073±0.51	1.67599
17833227	5.3405±0.16	4.8552±0.1	5.3933±0.1	2.178
17764522	3.3297±0.18	2.8457±0.11	3.2653±0.1	2.00607
17602933	6.636±0.35	6.1358±0.48	6.418±0.11	1.77647
17602085	4.9407±0.05	4.4418±0.24	4.5805±0.15	1.644
17614865	6.2279±0.1	5.7011±0.48	5.3602±0.23	1.15902
17774210	6.9505±0.1	6.4469±0.31	6.6538±0.09	1.71317
17691605	5.5229±0.49	5.0911±0.05	5.19±0.42	1.64048
17829032	4.7167±0.17	4.2001±0.45	4.2865±0.38	1.58189
17876865	4.8046±0.17	4.3164±0.18	4.6578±0.48	1.94553
17817441	7.7076±0.1	7.1901±0.43	7.3961±0.01	1.69329
17608129	5.7634±0.33	5.2995±0.09	5.7417±0.66	2.14315
17607281	6.0884±0.45	5.6467±0.03	5.3384±0.22	1.21837
17867699	6.1553±0.32	5.6784±0.27	6.1551±0.56	2.14682
17719263	4.1266±0.13	3.6365±0.19	3.7309±0.28	1.60963
17825924	4.5691±0.43	4.1267±0.04	4.6772±0.53	2.27064
17612888	6.2403±0.14	5.7302±0.39	6.0289±0.11	1.81409
17874785	4.4294±0.37	3.9687±0.16	4.0353±0.47	1.60784
17600887	6.4994±0.3	6.0294±0.13	6.7509±0.64	2.59117
17725354	6.3033±0.27	5.8318±0.06	5.9217±0.11	1.59829
17722413	3.7136±0.12	3.229±0.07	3.2883±0.03	1.56219
17604787	4.5868±0.21	4.0413±0.64	3.6443±0.31	1.09865
17602365	4.457±0.79	4.0085±0.81	4.1432±0.61	1.59367
17617484	8.4585±0.19	7.9776±0.13	8.3592±0	1.95012
17841727	5.5279±0.27	5.013±0.51	5.2792±0.33	1.77216
17605279	6.1603±0.17	5.6814±0.02	5.3148±0.41	1.18722
17607335	7.2286±0.21	6.7526±0	7.3391±0.17	2.2598
17655118	9.4351±0.59	9.0281±0.13	7.9741±0.13	0.722535
17787100	9.4883±0.21	9.0061±0.2	9.3105±0.29	1.86195
17603287	3.645±0.45	3.187±0.35	3.1244±0.1	1.41654
17600383	7.8026±0.56	7.3889±0.17	7.3722±0.01	1.47738
17600133	5.5868±0.57	5.1811±0.11	6.1905±0.54	3.12
17747778	6.4691±0.45	6.0264±0.19	6.2437±0.31	1.75637
17843087	3.4934±0.2	3.0132±0.18	3.2113±0.1	1.71674
17722380	3.9363±0.37	3.4664±0.33	3.4284±0.15	1.44577
17602123	4.8022±0.5	4.2588±0.82	4.7681±0.49	2.03226
17822695	10.5564±0.07	10.0727±0.1	10.4346±0.08	1.92679
17694591	3.7127±0.22	3.2398±0.06	3.4633±0.76	1.87233
17815524	4.3518±0.17	3.8694±0.19	4.2434±0.56	2.00882
17633391	6.0514±0.14	5.5584±0.29	5.9228±0.2	1.92131
17604961	5.3519±0.11	4.8403±0.43	5.3253±0.2	2.06382
17872512	4.3542±0.12	3.8527±0.36	4.0687±0.06	1.71595
17606591	7.6842±0.12	7.1962±0.23	7.427±0.27	1.76508
17604057	5.5776±1.01	5.1911±0.78	5.6334±0.06	1.89833
17600819	5.6816±0.24	5.2103±0.12	5.3738±0.26	1.69104
17640855	5.5691±0.18	5.0941±0.05	5.5557±0.24	2.07921
17697697	3.9122±0.48	3.4776±0.12	3.3454±0.13	1.36922
17724429	3.9891±0.11	3.499±0.26	3.8331±0.18	1.88342
17608287	5.2791±0.46	4.8483±0.04	5.1728±0.14	1.88224
17604431	4.7229±0.37	4.2457±0.41	4.1043±0.21	1.33932
17674975	4.0927±0.24	3.6116±0.27	3.8022±0	1.69705
17605961	4.4859±0.2	3.9403±0.66	4.1763±0.23	1.68924
17602341	5.8783±0.38	5.4276±0.12	5.9195±0.06	2.10662
17697902	4.7319±0.59	4.3334±0.01	4.8171±0.26	2.11436
17603275	7.3403±0.13	6.8283±0.46	6.9151±0.18	1.55985
17604183	3.8942±0.66	3.488±0.43	3.2178±0.18	1.22182
17609827	5.8722±0.02	5.3899±0.12	5.6184±0.15	1.7594
17606991	6.6697±0.21	6.1396±0.6	6.2663±0.2	1.57818
17603745	6.097±0.45	5.6599±0.13	5.1343±0.62	1.08887
17774166	3.6862±0.36	3.2184±0.32	3.527±0.18	1.84149
17602835	6.3875±0.4	5.943±0.12	6.4658±0.64	2.25886
17822169	3.9242±0.51	3.4791±0.38	3.4535±0.12	1.45094
17605589	4.4973±0.31	4.0371±0.14	4.7734±0.59	2.59884
17752427	3.5199±0.32	3.0654±0.04	3.2099±0.06	1.65843
17604891	5.3643±0.85	5.0596±0.05	5.1432±0.07	1.59009
17606725	5.1836±0.65	4.7996±0.19	4.4542±0.1	1.17696
17824981	3.749±0.21	3.2764±0.15	3.4977±0.08	1.74567
17601599	4.8701±0.13	4.3168±0.68	5.0199±0.26	2.33262
17615650	6.6493±0.6	6.2382±0.23	6.1486±0.41	1.42898
17791779	3.5327±0.26	3.0619±0.21	3.6971±0.23	2.33152
17685625	5.9102±0.23	5.4439±0.01	5.5937±0.12	1.66684
17602621	6.0334±0.35	5.5785±0.17	5.4745±0.16	1.39477
17600473	3.4426±0.39	2.9912±0.23	3.3048±0.05	1.85291
17605411	7.2732±0.04	6.7932±0.12	7.1658±0.07	1.93966
17784575	4.6047±0.46	4.1757±0.02	4.3056±0	1.64126
17658026	7.3186±0.34	6.8632±0.17	7.1317±0.08	1.80205
17807275	3.5221±0.05	3.0168±0.41	3.1776±0.18	1.65056
17604747	4.192±0.71	3.8164±0.11	3.7155±1.31	1.69664
17868311	7.909±0.18	7.4278±0.26	7.5078±0.26	1.58554
17822958	4.079±0.43	3.6284±0.32	3.9831±0.18	1.90264
17738904	3.6878±0.27	3.2274±0.08	3.3385±0.11	1.62121
17883209	7.4575±0.7	7.0991±0.06	6.6608±0.75	1.18212
17881593	4.3786±0.07	3.9013±0.11	4.0896±0.3	1.72468
17608797	5.0833±0.64	4.6869±0.17	4.8912±0	1.7222
17707669	6.0985±0.21	5.6284±0.15	5.7311±0.13	1.60941
17795674	3.5528±0.21	3.0869±0.05	3.3148±0.05	1.75645
17666502	4.4785±0.45	4.0343±0.27	4.2205±0.42	1.72814
17605329	5.4672±0.32	4.9984±0.31	5.5904±0.72	2.37512
17602709	4.6033±0.25	4.1372±0.19	4.0652±0.02	1.42115
17604829	6.3035±0.59	5.8196±0.75	5.4234±0.43	1.09028
17710786	5.4594±0.08	4.9712±0.29	5.4885±0.02	2.12484
17600079	3.3724±0.59	2.9693±0.15	3.5277±0.55	2.28413
17601073	3.5362±0.48	3.0923±0.38	3.2069±0.06	1.59617
17601407	3.5362±0.48	3.0923±0.38	3.2069±0.06	1.59617
17606041	7.595±0.1	7.0875±0.46	7.0896±0.32	1.48286
17604939	4.0037±0.19	3.5319±0.2	3.5015±0.44	1.49503
17612872	7.3028±0.39	6.862±0.07	6.7784±0.15	1.41855
17602553	6.6608±0.48	6.2373±0.02	6.7613±0.07	2.15822
17702334	6.0206±0.1	5.5491±0.09	6.1086±0.2	2.21867
17655129	8.0775±0.37	7.6367±0	7.2682±0.11	1.16351
17654267	3.3372±0.55	2.9349±0.09	3.0627±0.16	1.64254
17866026	8.0681±0.26	7.5973±0.29	7.7935±0.58	1.76974
17783093	4.5837±0.4	4.1218±0.4	4.5099±0.21	1.93498
17609557	8.1197±0.33	7.6731±0.06	7.8337±0.05	1.67648
17604071	4.6165±0.72	4.2283±0.37	4.3555±0.52	1.66469
17608277	7.3695±0.17	6.8904±0.29	7.1092±0.33	1.75022
17600171	5.5642±0.8	5.2362±0.27	5.0478±0.71	1.38432
17681823	12.096±0.24	11.6364±0.08	11.5408±0.41	1.43055
17600147	6.6125±0.09	6.1242±0.33	6.0012±0.18	1.36514
17601169	3.3169±0.69	2.954±0.22	2.7476±0.25	1.30204
17601503	3.3169±0.69	2.954±0.22	2.7476±0.25	1.30204
17602583	4.8841±0.55	4.4686±0.24	4.5813±0.59	1.67927
17856197	4.4564±0.09	3.9302±0.58	4.3908±0.66	2.08765
17629816	4.6353±0.03	4.1642±0.02	4.1508±0.36	1.50963
17668402	3.3002±0.5	2.8749±0.26	3.1814±0.06	1.84035
17827987	6.4269±0.44	5.9958±0.2	6.5287±0.27	2.17888
17627738	4.212±0.2	3.7338±0.32	3.957±0	1.73028
17680604	5.1594±0.04	4.6887±0.05	4.7602±0.02	1.57586
17608733	6.3885±0.45	5.9531±0.22	6.2049±0.07	1.77681
17791944	3.6733±0.26	3.2185±0.05	3.3997±0.11	1.70278
17752517	5.8954±0.5	5.4802±0.04	5.7857±0.2	1.86243
17607351	5.3804±0.99	5.0931±0.28	4.7536±0.25	1.1836
17700353	3.7952±0.31	3.3464±0.04	3.4722±0	1.63636
17600517	8.0578±0.11	7.5909±0.01	7.9849±0.06	1.97204
17833247	3.5987±0.4	3.1663±0.04	3.2064±0.03	1.54223
17870350	6.8325±0.33	6.3871±0.06	6.4605±0.07	1.57861
17736435	3.7948±0.21	3.335±0.01	3.4871±0	1.66678
17609583	5.4241±0.11	4.952±0.18	4.4976±0.22	1.0968
17795497	3.8257±0.28	3.3726±0.09	3.512±0.29	1.66705
17604197	6.6744±0.23	6.1143±0.78	6.4603±0.35	1.80283
17822873	6.8764±0.24	6.3068±0.82	6.3557±1.17	1.67549
17764722	4.317±0.29	3.8637±0.13	4.2594±0.38	2.00438
17795957	8.4283±0.28	7.9714±0.18	7.9229±0.11	1.44696
17877685	3.9788±0.28	3.528±0.02	3.5521±0.23	1.53455
17748426	5.2539±0.23	4.7839±0.28	4.9659±0.19	1.69258
17609839	6.1852±0.3	5.7343±0.15	6.2586±0.03	2.15167
17724956	4.3375±0.09	3.8714±0.02	4.152±0.01	1.82192
17623007	7.6922±0.4	7.2291±0.44	7.4174±0.05	1.67068
17759507	4.8165±0.14	4.3405±0.27	4.8153±0.18	2.07398
17619060	4.5194±0.6	4.1294±0.19	4.2261±0.37	1.6231
17600311	6.4735±0.32	5.8805±0.94	6.6098±0.95	2.48756
17600435	6.1973±0.14	5.7297±0.17	6.0886±0.08	1.91829
17808608	7.6613±0.03	7.1903±0.16	7.2197±0.51	1.57404
17706237	3.6122±0.14	3.1487±0.08	3.484±0.1	1.89314
17825118	5.0614±0.45	4.6275±0.31	4.9324±0.12	1.83512
17601649	4.6812±0.41	4.2312±0.34	4.1752±0.13	1.42559
17603177	5.4306±0.22	4.9697±0.18	4.9048±0.11	1.4306
17600283	3.7686±0.43	3.3402±0.11	3.1356±0.13	1.30233
17842110	4.2399±0.12	3.7741±0.13	4.0184±0.14	1.77702
17600587	6.5926±0.23	6.1368±0.09	5.8526±0.27	1.2411
17610101	6.5926±0.23	6.1368±0.09	5.8526±0.27	1.2411
17880627	5.8969±0.22	5.4389±0.14	5.7292±0	1.83016
17829341	3.8421±0.27	3.392±0.02	3.8429±0.1	2.05293
17605993	7.5013±0.15	7.0278±0.28	7.6201±0.33	2.26971
17801263	7.4355±0.03	6.9529±0.32	6.9215±0.59	1.51086
17872199	4.9152±0.22	4.4604±0.02	5.0022±0.21	2.1952
17629145	3.7612±0.24	3.3076±0.1	3.4933±0	1.70417
17815526	6.8631±0.09	6.3993±0	6.0257±0.31	1.17083
17607955	4.2841±0.27	3.8196±0.31	4.2397±0.48	2.03902
17602223	5.4469±0.31	5.0036±0.04	5.4425±0.1	2.03548
17609879	7.8422±0.16	7.3798±0.14	7.712±0.17	1.89078
17609605	6.0218±0.51	5.6129±0.12	5.6972±0.35	1.61184
17658462	9.3688±0.42	8.9332±0.28	9.0694±0.78	1.75518
17603555	6.0938±0.22	5.5615±0.68	5.6366±0.41	1.52635
17722302	3.9409±0.19	3.4823±0.11	3.7976±0.1	1.86584
17604321	3.9073±0.11	3.4451±0.06	3.4869±0.19	1.54997
17732286	5.9752±0.13	5.5099±0.17	5.268±0.36	1.28418
17748260	6.2843±0.3	5.8367±0.16	5.6924±0.16	1.3574
17696200	8.2292±0.49	7.8206±0.05	7.65±0.49	1.3715
17607495	4.6463±0.33	4.1827±0.37	3.9903±0.37	1.31249
17608913	4.6463±0.33	4.1827±0.37	3.9903±0.37	1.31249
17608345	3.9659±0.68	3.6147±0.08	3.5471±0.35	1.45162
17661173	4.9422±0.16	4.4756±0.22	4.8724±0.58	2.0445
17605689	5.2912±0.41	4.8637±0.03	5.0412±0.45	1.73828
17849232	6.3175±0.42	5.8871±0.21	6.1308±0.51	1.82297
17732719	6.2696±0.53	5.8662±0.18	6.3219±0.69	2.16705
17603307	4.3593±0.81	4.0377±0.34	4.0412±0.17	1.48781
17746275	5.7071±0.29	5.2623±0.08	5.3675±0.32	1.63203
17602811	7.5258±0.29	7.081±0.1	7.8493±0.39	2.59852
17646693	4.6523±0.14	4.1912±0.11	4.5401±0.07	1.90854
17601175	5.3927±1	5.135±0.29	5.6863±0.96	2.42219
17601509	5.3927±1	5.135±0.29	5.6863±0.96	2.42219
17605053	7.6607±0.3	7.2145±0.12	7.5814±0.16	1.93673
17606355	6.4474±0.36	5.9916±0.36	6.1968±0.05	1.70332
17801261	6.7777±0.46	6.3292±0.46	6.772±0.27	2.00448
17822876	9.0777±0.34	8.6138±0.42	8.6224±0.42	1.50979
17603771	7.9711±0.34	7.5112±0.39	8.0758±0.41	2.22229
17606821	5.1538±0.15	4.6889±0.21	5.3391±0.2	2.35205
17606589	3.8179±0.43	3.3964±0.08	3.5287±0.13	1.64598
17801428	5.2787±0.72	4.934±0.24	4.6569±0.42	1.25542
17645362	4.6311±0.19	4.1136±0.61	4.8086±0.31	2.34981
17607445	5.043±0.22	4.5736±0.33	4.6779±0.22	1.60066
17606059	6.4684±0.62	6.0845±0.19	6.5958±0.01	2.12862
17609661	7.4449±0.12	6.9785±0.22	7.2107±0.01	1.75183
17605335	4.6425±0.26	3.9538±1.22	5.1386±0.91	3.17415
17642891	8.0294±0.18	7.5717±0.16	7.7917±0.05	1.74219
17706035	6.3515±0.08	5.8734±0.33	6.1513±0.25	1.80835
17601155	5.3409±0.24	4.8935±0.05	4.9236±0.35	1.55379
17601489	5.3409±0.24	4.8935±0.05	4.9236±0.35	1.55379
17746568	4.3852±0.3	3.9224±0.37	4.1444±0.02	1.72148
17640358	4.0501±0.58	3.6682±0.02	3.7378±0.07	1.57498
17788899	6.3334±0.27	5.8784±0.26	5.8713±0.07	1.48164
17605285	6.3056±0.52	5.8494±0.58	6.5425±0.27	2.35011
17619179	3.2515±0.32	2.8153±0.03	2.9403±0.16	1.6407
17603375	6.248±0.52	5.8334±0.36	5.7126±0.65	1.42805
17600797	6.1591±0.69	5.8136±0.05	5.769±0.13	1.45681
17603753	5.1373±0.68	4.7576±0.31	5.2815±0.01	2.1319
17606193	7.2067±0.37	6.7787±0.1	7.1204±0.24	1.91212
17719541	4.1801±0.35	3.7499±0.05	3.6953±0.02	1.44391
17665034	3.4085±0.71	3.0625±0.1	3.3518±0.13	1.83488
17701790	4.1571±0.48	3.7307±0.34	4.1041±0.01	1.91714
17868040	3.5313±0.29	3.0918±0	3.2272±0.03	1.64781
17605487	7.1667±0.09	6.7075±0.14	7.0291±0.47	1.92026
17708150	8.6601±0.19	8.2108±0	8.6305±0.23	2.01905
17607341	6.1287±0.42	5.7118±0.05	5.9524±0.41	1.80824
17838196	5.6166±0.13	5.0974±0.62	5.7264±0.08	2.2179
17806577	6.6821±0.16	6.2305±0.02	6.4003±0.09	1.68898
17601989	3.2872±0.64	2.9142±0.09	3.6865±0.15	2.56654
17826776	5.3573±0.2	4.9095±0.02	5.4143±0.14	2.13308
17819325	4.341±0.26	3.8874±0.26	4.5012±0.32	2.30387
17713895	4.4728±0.42	4.0527±0.11	4.1543±0.07	1.60803
17608481	6.5005±0.11	6.0421±0.16	5.8407±0.05	1.30089
17659584	6.5608±0.2	6.1108±0.14	6.2378±0.3	1.65227
17607537	6.8813±0.1	6.4262±0.08	6.2697±0.6	1.40339
17608955	6.8813±0.1	6.4262±0.08	6.2697±0.6	1.40339
17600323	6.0034±0.52	5.5175±0.76	5.6468±0.32	1.55292
17600713	3.1693±0.54	2.7818±0.02	2.8122±0.02	1.53202
17610227	3.1693±0.54	2.7818±0.02	2.8122±0.02	1.53202
17604059	5.6292±0.72	5.2968±0.15	5.48±0.19	1.70539
17664136	3.428±0.19	2.9804±0	3.01±0.13	1.53443
17876560	5.5776±0.13	5.1213±0.17	5.1808±0.02	1.55793
17786837	4.9272±0.24	4.4724±0.27	4.6259±0.06	1.65413
17824770	5.1899±0.38	4.7614±0.18	5.0591±0.2	1.84525
17689691	4.5339±0.17	4.034±0.55	4.7155±0.39	2.36273
17609735	5.2823±0.92	5.0297±0.23	5.6555±0.12	2.30436
17600259	5.956±0.22	5.4973±0.3	4.7195±0.55	0.897517
17822862	8.6674±0.2	8.2199±0.1	8.4727±0.02	1.78531
17826761	7.2883±0.21	6.8276±0.31	7.2497±0.03	1.9878
17805663	5.9067±0.15	5.4536±0.15	5.9098±0.33	2.07993
17685231	4.1376±0.12	3.648±0.48	3.6367±0.28	1.46245
17869426	6.7828±0.18	6.3258±0.24	6.452±0.03	1.62587
17605903	5.5223±0.53	5.1357±0.06	5.2788±0.13	1.65931
17602847	6.7621±0.32	6.3258±0.17	6.6592±0.1	1.88523
17604521	8.6721±0.63	8.2937±0.32	8.6285±0.22	1.87991
17802806	6.0129±0.38	5.5869±0.2	5.6163±0.14	1.52678
17604803	7.6596±0.33	7.2283±0.15	7.4963±0.25	1.81497
17608279	3.7483±0.37	3.3271±0	3.3618±0.07	1.53751
17655562	3.5538±0.1	3.1027±0.04	3.2046±0.21	1.61775
17608073	4.5941±0.22	4.1502±0.09	4.6822±0.41	2.21192
17607751	7.5283±0.23	7.0639±0.36	7.1619±0.04	1.58091
17609169	7.5283±0.23	7.0639±0.36	7.1619±0.04	1.58091
17773336	3.9233±0.66	3.5743±0.12	3.8486±0.34	1.83645
17600363	6.064±0.21	5.6181±0.14	6.0748±0.22	2.06507
17795527	3.7815±0.12	3.332±0.03	3.9551±0.11	2.31382
17603011	5.2135±0.65	4.8498±0.04	5.1482±0.14	1.8483
17870299	7.5459±0.35	7.1209±0.01	7.2303±0.21	1.62675
17816099	6.115±0.06	5.6614±0.12	6.1002±0.23	2.0431
17607543	5.832±0.29	5.3826±0.3	5.278±0.13	1.38273
17608961	5.832±0.29	5.3826±0.3	5.278±0.13	1.38273
17717652	4.0061±0.58	3.6282±0.12	4.0002±0.37	1.96943
17648522	10.5422±0.07	10.0892±0.11	10.2407±0.2	1.67159
17656681	8.8428±0.19	8.3895±0.24	8.8241±0.01	2.01365
17608673	7.8729±0.08	7.4222±0.05	7.6111±0.02	1.70931
17707441	3.4045±0.12	2.9512±0.17	3.2078±0.13	1.78985
17604825	7.8323±0.4	7.3703±0.53	8.3241±0.38	2.85948
17641525	2.9904±0.45	2.5846±0.13	2.7975±0.01	1.73525
17606169	5.1413±0.14	4.6693±0.38	5.271±0.08	2.23844
17608565	3.2323±0.6	2.8426±0.35	3.094±0.07	1.76056
17603327	5.0017±0.66	4.5202±0.88	4.3865±0.85	1.35943
17703296	4.9645±0.2	4.4286±0.75	4.7191±0	1.7185
17754367	7.4612±0.2	6.9905±0.41	6.621±0.61	1.18956
17605963	6.3373±0.29	5.8944±0.24	6.0887±0.22	1.71466
17609399	7.057±0.11	6.6089±0.01	6.6101±0.16	1.50616
17608337	6.1721±0.41	5.7575±0.09	6.1583±0.49	2.03585
17612406	3.4917±0.22	3.0516±0.05	3.2403±0.05	1.70968
17609455	3.8089±0.37	3.3912±0.05	3.6633±0.42	1.84954
17664776	4.924±0.36	4.5032±0.05	4.5373±0.03	1.53569
17737873	3.5745±0.27	3.1305±0.24	3.4021±0.14	1.80223
17636429	3.3845±0.43	2.9772±0.11	2.8812±0.08	1.40242
17868415	7.4494±0.56	7.0507±0.29	6.87±0.35	1.32883
17658824	4.8997±0.12	4.4041±0.53	4.4916±0.41	1.572
17840821	5.212±0.26	4.7768±0.03	4.7559±0.31	1.49526
17611148	5.293±0.13	4.8465±0.06	4.476±0.05	1.16007
17841062	5.5822±0.07	5.129±0.16	5.1209±0.18	1.49266
17655783	6.0364±0.34	5.6119±0.11	5.9037±0.37	1.86325
17603439	7.2181±0.11	6.7496±0.36	7.2115±0.51	2.09922
17606281	4.9646±0.24	4.5006±0.41	4.4431±0.17	1.41816
17605845	6.6474±0.52	6.2354±0.37	6.3502±0.41	1.62973
17693492	6.7708±0.1	6.2846±0.48	6.7078±0.05	1.95689
17609359	5.3158±0.46	4.8648±0.54	5.0072±0.67	1.68679
17603679	5.1026±0.51	4.6981±0.29	4.9143±0.66	1.81598
17747912	6.1918±0.16	5.748±0.09	6.3129±0.27	2.23611
17627241	3.5655±0.14	3.1137±0.22	3.3595±0.12	1.77149
17835402	10.1376±0.08	9.6824±0.23	9.1375±0.31	1.03374
17693406	4.6898±0.11	4.196±0.53	4.3678±0.02	1.63366
17700410	7.0827±0.18	6.6414±0.09	7.0237±0.1	1.95556
17601959	6.3279±0.18	5.8835±0.16	6.4037±0.13	2.14887
17607425	5.5295±0.02	5.0788±0.14	4.5092±0.15	1.01115
17843235	5.0878±0.29	4.6599±0.01	5.0853±0.05	2.01504
17874235	5.0072±0.33	4.5832±0.14	4.7644±0.02	1.69675
17608769	5.49±1.11	5.2809±0.14	5.6468±0.23	1.94087
17605191	6.7419±0.06	6.2763±0.34	6.7311±0.3	2.0494
17735293	6.544±0.18	6.1038±0.07	6.2765±0.06	1.69037
17723093	5.3333±0.25	4.9±0.11	5.166±0.13	1.80479
17688206	5.1708±0.18	4.7312±0.08	4.8425±0.01	1.61915
17604777	6.2731±0.04	5.6512±1.03	6.6256±0.48	2.68149
17675684	6.1748±0.06	5.7189±0.25	5.896±0	1.68317
17606873	4.6272±0.13	4.1178±0.63	3.9796±0.33	1.31715
17614763	4.5024±0.23	4.0602±0.22	4.2989±0.13	1.76298
17619431	3.5455±0.15	3.0764±0.41	3.3302±0.12	1.75637
17635922	3.5644±0.09	3.1193±0.1	3.4477±0.32	1.90405
17755248	5.3104±0.33	4.8326±0.58	5.2899±0.04	1.98039
17694443	3.5016±0.55	3.1279±0.03	3.3006±0.8	1.82301
17609675	3.671±0.32	3.2262±0.37	3.0482±0.35	1.32378
17857928	4.6383±0.09	4.1917±0.14	4.3366±0.09	1.65613
17609925	6.2547±0.66	5.9095±0.05	5.8229±0.21	1.41956
17619191	4.3279±0.27	3.8773±0.36	3.8006±0.06	1.40103
17608193	3.7105±0.31	3.2876±0.04	3.4422±0.19	1.67639
17600405	6.0498±0.5	5.6579±0	5.567±0.32	1.42592
17774140	4.0304±0.54	3.6522±0.13	3.778±0.42	1.66738
17702446	4.7844±0.04	4.3326±0.2	4.9197±0.27	2.26213
17727127	3.2105±0.17	2.7699±0.13	3.0293±0.11	1.79459
17680713	3.5061±0.44	3.0944±0.23	3.2683±0.19	1.6887
17619908	5.7617±0.99	5.3826±1.03	5.3815±0.24	1.33526
17602289	8.5731±0.33	8.1027±0.55	8.254±0.34	1.62983
17606801	5.6368±0.28	5.2008±0.24	5.7709±0.32	2.23832
17824104	4.9689±0.16	4.5278±0.12	4.704±0.24	1.70359
17608003	4.6118±1.04	4.4174±0.09	3.6344±0.14	0.873025
17608329	4.1967±0.33	3.7766±0.12	4.2321±0.65	2.15747
17641711	3.2714±0.23	2.839±0.06	3.0562±0.04	1.74315
17873136	3.7461±0.59	3.3802±0.15	3.6112±0.03	1.75604
17606255	6.1618±0.41	5.6759±0.7	6.1548±0.75	2.10724
17604715	5.2604±0.49	4.8444±0.37	5.0839±0.36	1.76871
17767944	4.5492±0.28	4.0913±0.43	4.2089±0	1.59182
17872530	5.0828±0.11	4.6248±0.32	4.9107±0.15	1.81129
17774307	4.1849±0.2	3.7475±0.15	3.8449±0.02	1.60029
17604775	4.943±0.55	4.5169±0.58	4.6908±0.26	1.6392
17869956	7.6915±0.19	7.2451±0.27	7.3259±0.23	1.58295
17689789	4.021±0.44	3.6212±0.03	3.6963±0.04	1.58035
17603845	3.8365±0.18	3.4014±0.07	3.5952±0.26	1.72873
17606569	6.2664±0.2	5.8083±0.38	6.4386±0.09	2.2836
17601911	5.6232±0.23	5.0792±0.83	6.3433±0.36	3.37918
17700351	3.2972±0.27	2.8712±0.1	2.9971±0.03	1.63509
17842223	4.8604±0.3	4.4386±0.05	4.3796±0.01	1.43938
17821654	5.5836±0.2	5.1462±0.19	5.5913±0.48	2.0907
17700648	5.8646±0.31	5.439±0.19	5.6019±0.06	1.67267
17862262	8.7258±0.13	8.2875±0.1	8.4635±0.06	1.69323
17608221	5.6015±0.33	5.1825±0.16	5.1834±0.15	1.50013
17715945	3.3485±0.23	2.92±0.06	3.0441±0.09	1.6356
17791192	7.7961±0.1	7.3527±0.18	7.7418±0.04	1.95701
17609629	5.638±0.14	5.1987±0.15	5.3157±0.75	1.73289
17785963	4.1706±0.6	3.8058±0.17	4.4581±0.69	2.48645
17602247	4.9139±0.12	4.4691±0.22	4.6675±0.24	1.72251
17696705	5.9753±0.13	5.5387±0.09	5.9935±0.25	2.06995
17774361	3.9273±0.39	3.5175±0.17	3.9152±0.14	1.97398
17601013	5.6599±0.4	5.2569±0.05	5.8289±0.28	2.25048
17601347	5.6599±0.4	5.2569±0.05	5.8289±0.28	2.25048
17689259	3.332±0.32	2.913±0.15	2.9846±0.05	1.5723
17683384	4.4819±0.06	3.9647±0.68	4.6099±0.23	2.2336
17604505	4.7865±1.21	4.6787±0.36	4.1231±0.37	1.02111
17880327	3.3903±0.47	3.0055±0.03	3.0016±0.22	1.50483
17836566	4.7852±0.17	4.331±0.36	4.3669±0.31	1.53154
17883193	5.0508±0.16	4.6014±0.31	4.9767±0.15	1.92812
17880878	6.8808±0.19	6.4426±0.23	6.6554±0.09	1.72939
17601139	6.1353±0.25	5.6487±0.61	5.6456±0.37	1.45665
17601473	6.1353±0.25	5.6487±0.61	5.6456±0.37	1.45665
17665150	3.7988±0.11	3.3535±0.24	3.3769±0.23	1.52337
17603981	5.3128±0.09	4.8731±0.16	4.7882±0.76	1.50881
17755420	4.6248±0.28	4.1877±0.33	4.3895±0.04	1.70376
17603219	7.4957±0.32	7.0685±0.29	7.2936±0.09	1.73686
17606431	4.6086±0.65	4.2623±0.02	4.8547±0.87	2.47153
17791260	5.3274±0.17	4.8967±0	5.2722±0.01	1.94588
17605935	4.5073±0.26	4.0855±0.03	4.2092±0.06	1.63479
17669332	4.0092±0.16	3.5753±0.13	4.1966±0.23	2.31742
17602381	5.8833±0.44	5.4767±0.31	5.4145±0.29	1.43379
17880259	5.1627±0.11	4.7148±0.29	5.1645±0.01	2.02871
17675699	5.5505±0.32	5.139±0.03	5.3083±0.15	1.69101
17605669	6.1834±0.13	5.7469±0.15	5.6949±0.79	1.5529
17605871	4.5178±0.79	4.174±0.53	4.059±1.26	1.60226
17617900	4.8485±0.17	4.3956±0.37	5.0333±0	2.29548
17610374	4.0263±0.47	3.6411±0.13	4.1617±0.58	2.23577
17697502	6.7308±0.12	6.2975±0.09	6.2899±0.37	1.51461
17601907	4.589±0.87	4.3156±0.11	4.9416±0.69	2.44492
17658510	6.0465±0.05	5.6127±0.01	5.9607±0.15	1.91453
17602979	5.998±0.24	5.5763±0.05	5.4994±0.03	1.42186
17852831	5.9807±0.24	5.5597±0.05	5.8779±0.08	1.87103
17722825	3.6612±0.32	3.2511±0.05	3.6923±0.05	2.03669
17748424	6.0449±0.17	5.6151±0.13	5.7153±0.05	1.60531
17724150	5.163±0.14	4.7254±0.22	4.7777±0.02	1.54618
17857830	7.1613±0.62	6.7933±0.28	6.4711±0.05	1.18884
17857877	7.1613±0.62	6.7933±0.28	6.4711±0.05	1.18884
17687349	6.3642±0.23	5.8655±0.67	6.3833±0.08	2.03766
17826517	8.3717±0.17	7.8624±0.7	8.2429±0.01	1.8443
17609695	5.6617±0.69	5.3309±0.27	5.6553±0.3	1.88194
17749136	4.5257±0.36	4.1243±0	3.9492±0.25	1.33838
17608233	4.406±1.26	4.3656±0.03	3.9127±0.14	1.09815
17602277	5.166±0.14	4.6917±0.52	4.9465±0.62	1.81349
17771812	3.8234±0.41	3.4181±0.23	3.2628±0.07	1.33886
17667433	5.955±0.26	5.5331±0.16	5.3553±0.27	1.33393
17636776	4.0704±0.3	3.6505±0.22	3.741±0.11	1.59034
17759462	4.8693±0.16	4.4398±0.13	4.6163±0.07	1.6927
17608555	4.923±0.3	4.5093±0.1	5.0163±0.38	2.16604
17684295	4.319±0.01	3.861±0.39	4.3365±0.12	2.05251
17665118	4.6375±0.44	4.2278±0.34	4.5412±0.01	1.83851
17613189	6.4597±0.3	6.0434±0.17	6.5047±0.44	2.10532
17602801	4.7423±0.43	4.3507±0.04	3.9486±0.52	1.17134
17713465	6.5941±0.48	6.2142±0.03	6.1136±0.14	1.40208
17872939	5.8304±0.24	5.3698±0.49	5.727±0.19	1.87503
17709090	3.9185±0.4	3.5173±0.2	3.7188±0.27	1.73183
17603907	5.4532±0.38	5.0233±0.43	5.2575±0.34	1.75098
17606007	4.8758±0.64	4.5326±0.27	5.3336±0.03	2.59124
17605381	4.4375±0.96	4.208±0.07	4.485±0.22	1.82693
17878012	4.1061±0.32	3.6991±0.01	3.7173±0.18	1.52497
17601157	5.8389±0.4	5.4049±0.48	5.6175±0.17	1.69807
17601491	5.8389±0.4	5.4049±0.48	5.6175±0.17	1.69807
17841708	3.3307±0.07	2.8914±0.23	3.0117±0.14	1.62389
17791919	7.0042±0.34	6.5785±0.36	6.8243±0.2	1.76031
17608495	4.0794±0.46	3.6975±0.13	3.5536±0.32	1.37222
17842866	3.5127±0.28	3.0994±0.02	3.2626±0.04	1.67995
17601077	5.8142±0.5	5.4306±0.22	6.1832±0.03	2.51286
17601411	5.8142±0.5	5.4306±0.22	6.1832±0.03	2.51286
17712642	5.6024±0.06	5.1439±0.42	5.3345±0.15	1.68123
17869453	6.8759±0.24	6.4451±0.29	6.1504±0.57	1.25874
17609845	7.9301±0.11	7.4975±0.18	7.9801±0.26	2.10425
17784258	7.0098±0.14	6.5577±0.4	6.778±0.21	1.72428
17786970	4.4722±0.15	4.0481±0.03	4.3018±0	1.78822
17602023	7.527±0.17	7.0951±0.24	7.4847±0.35	1.98074
17609367	6.0283±0.2	5.5732±0.46	5.7612±0.09	1.66822
17605417	4.9444±0.43	4.5564±0.02	4.3055±0.31	1.2754
17762885	3.9013±0.21	3.4828±0.06	3.2861±0.34	1.32642
17870108	4.7615±0.61	4.4053±0.24	4.4704±0.15	1.56257
17602805	6.3826±1.07	6.1811±0.04	5.7773±0.22	1.13987
17602599	4.1371±0.83	3.8193±0.57	3.8183±0.18	1.44823
17601579	8.9819±0.27	8.5547±0.31	8.838±0.04	1.80558
17602665	5.2135±0.4	4.8179±0.18	5.2483±0.23	2.02676
17883047	7.1708±0.38	6.747±0.41	7.0257±0.47	1.82968
17883063	7.1708±0.38	6.747±0.41	7.0257±0.47	1.82968
17883079	7.1708±0.38	6.747±0.41	7.0257±0.47	1.82968
17883093	7.1708±0.38	6.747±0.41	7.0257±0.47	1.82968
17646209	5.1345±0.34	4.7296±0.16	4.9669±0.17	1.76896
17674313	8.5706±0.16	8.127±0.36	8.5461±0.21	1.98556
17693878	5.3395±0.26	4.8651±0.61	5.3807±0.13	2.05663
17604429	5.6244±0.3	5.2104±0.22	5.6902±0.13	2.0837
17741409	6.7527±0.09	6.327±0.05	6.43±0.16	1.61585
17600771	6.2383±0.53	5.8707±0.11	5.8081±0.11	1.43608
17607551	6.9985±0.6	6.5009±0.97	6.8373±0.24	1.71113
17608969	6.9985±0.6	6.5009±0.97	6.8373±0.24	1.71113
17722670	7.2618±0.04	6.8216±0.28	7.1138±0.06	1.82003
17674311	7.6445±0.23	7.2284±0.1	7.5902±0.47	1.97688
17804128	3.8522±0.32	3.448±0.1	3.6437±0.03	1.7159
17605637	5.0213±0.77	4.7296±0.17	4.4298±0.04	1.2147
17735945	6.8771±0.08	6.4506±0.11	6.5604±0.01	1.61646
17603323	7.6298±0.11	7.2009±0.18	7.3312±0.34	1.65816
17608111	6.7182±0.09	6.2881±0.19	6.7458±0.03	2.05165
17717823	6.4266±0.08	5.9931±0.23	6.1663±0.07	1.68135
17622673	8.2473±0.37	7.8554±0.04	7.8628±0.32	1.52557
17604685	3.4105±0.65	3.064±0.37	3.182±0.01	1.60128
17648904	4.6897±0.38	4.2961±0.03	4.1791±0.43	1.41368
17605835	4.543±0.48	4.1368±0.42	3.8858±0.19	1.23956
17635338	5.1028±0.1	4.68±0.04	4.6284±0.06	1.44753
17629172	4.9084±0.38	4.5167±0.06	4.7154±0.4	1.75395
17882927	3.0588±0.31	2.653±0.12	2.9596±0.03	1.85212
17603835	6.455±0.44	6.075±0.09	5.7408±0.37	1.20835
17602663	3.517±0.47	3.1432±0	4.2301±0.16	3.19645
17879617	5.1624±0.23	4.7447±0.18	5.1898±0.18	2.04278
17832376	4.8994±0.58	4.5476±0.06	5.4472±0.09	2.79996
17600385	8.3691±0.1	7.926±0.35	7.9302±0.15	1.48709
17608395	4.684±0.34	4.261±0.38	4.5116±0.34	1.77846
17640853	3.3043±0.14	2.8839±0.06	3.335±0.13	2.0539
17825947	5.9444±0.3	5.5349±0.19	5.7105±0.03	1.6871
17640073	4.6552±0.31	4.225±0.4	4.0476±0.08	1.30228
17608177	5.9913±0.19	5.5388±0.46	5.7531±0.52	1.75287
17805604	5.2923±0.43	4.8932±0.32	4.8955±0.29	1.49835
17603347	3.6149±0.56	3.2212±0.5	3.0473±0.29	1.30422
17610019	4.4517±0.26	4.0051±0.48	4.4984±0.7	2.17651
17604415	4.0597±1.02	3.6072±1.18	3.79±0	1.45131
17822905	8.6813±0.19	8.2263±0.48	7.763±0.38	1.0765
17600609	7.0515±0.12	6.5919±0.48	7.1487±0.26	2.16443
17610123	7.0515±0.12	6.5919±0.48	7.1487±0.26	2.16443
17600773	6.7526±0.35	6.3532±0.15	6.4608±0.12	1.61486
17881489	6.4361±0.4	6.047±0.15	6.1708±0.06	1.63037
17788338	6.7793±0.21	6.3661±0.01	5.8531±0.17	1.05492
17604613	8.3575±0.09	7.9235±0.27	7.7267±0.12	1.29943
17635954	5.5237±0.02	5.0412±0.59	5.1759±0.23	1.59082
17730997	4.3374±0.07	3.902±0.28	3.9416±0.1	1.52898
17798405	3.9358±0.35	3.5282±0.26	3.5783±0.07	1.54095
17739714	9.2821±0.22	8.8623±0.23	8.9803±0.43	1.65374
17607429	7.0099±0.14	6.5423±0.54	6.9643±0.44	1.98616
17602695	5.981±0.09	5.5571±0.15	6.005±0.07	2.04139
17604101	4.5977±0.6	4.2518±0.14	3.8992±0.27	1.18248
17607601	8.2644±0.28	7.8608±0.04	7.783±0.04	1.42115
17609019	8.2644±0.28	7.8608±0.04	7.783±0.04	1.42115
17601053	6.0493±0.59	5.7116±0.12	6.0105±0.12	1.84487
17601387	6.0493±0.59	5.7116±0.12	6.0105±0.12	1.84487
17604291	7.2446±0.38	6.8284±0.41	6.8009±0.33	1.46145
17714749	5.8268±0.26	5.4165±0.16	5.4003±0.16	1.48277
17604277	5.9332±0.51	5.5109±0.6	6.0013±0.13	2.02237
17879733	4.6933±0.42	4.3073±0.13	4.3905±0.01	1.58573
17603455	7.1101±0.46	6.7238±0.27	6.8962±0.05	1.67651
17812462	4.3685±0.35	3.9744±0.09	4.1398±0.2	1.68893
17605365	5.8939±0.47	5.5187±0.17	6.2576±0.07	2.4959
17601885	3.8179±0.41	3.3868±0.53	3.5848±0.21	1.67358
17600067	5.5192±0.28	5.1168±0.02	5.209±0.12	1.60196
17700609	3.8661±0.23	3.4483±0.23	3.661±0.11	1.72973
17805652	4.4522±0.25	4.0321±0.29	4.6784±0.11	2.32848
17882981	4.4522±0.25	4.0321±0.29	4.6784±0.11	2.32848
17851409	7.5298±0.23	7.1152±0.2	7.106±0.02	1.48334
17878712	3.7625±0.1	3.3452±0.01	3.3273±0.11	1.4835
17688117	6.4254±0.25	6.0197±0.02	6.1611±0.08	1.6557
17608835	3.6294±0.29	3.2276±0.08	3.0188±0.38	1.31949
17602137	6.3655±0.24	5.9399±0.34	6.559±0.1	2.27585
17648835	3.348±0.18	2.9361±0.05	3.2338±0.09	1.84513
17724639	5.2783±0.4	4.8942±0.12	4.5048±0.23	1.1505
17600359	6.0873±0.2	5.6712±0.2	5.5576±0.2	1.38632
17868212	8.0532±0.1	7.6142±0.36	7.8758±0.1	1.77181
17711204	4.7695±0.32	4.3733±0.04	4.4756±0.06	1.61052
17791892	3.7659±0.37	3.3789±0.05	3.8496±0.5	2.13979
17605383	8.014±0.34	7.6158±0.18	8.0373±0.06	2.00166
17602773	5.5085±0.41	5.1258±0.05	5.258±0.98	1.83787
17657789	9.1672±0.53	8.8162±0.04	8.4019±0.67	1.18607
17604855	7.427±0.54	7.0317±0.48	7.1319±0.29	1.57994
17876893	3.8253±0.34	3.4246±0.23	3.5851±0.01	1.66627
17608547	4.7158±0.23	4.2727±0.47	4.3123±0.02	1.50226
17607599	3.6021±0.59	3.2707±0.02	3.7539±0.44	2.14614
17609017	3.6021±0.59	3.2707±0.02	3.7539±0.44	2.14614
17637809	6.3114±0.26	5.9011±0.22	5.7909±0.16	1.38591
17779577	5.9093±0.22	5.4719±0.43	6.0775±0.43	2.28135
17684700	4.563±0.39	4.1804±0.02	4.541±0.03	1.92598
17607559	3.6033±0.23	3.196±0.11	3.5626±0.19	1.93952
17608977	3.6033±0.23	3.196±0.11	3.5626±0.19	1.93952
17865391	4.993±0.33	4.5764±0.39	4.7944±0.1	1.71585
17696837	7.5263±0.14	7.0914±0.36	7.46±0.02	1.90639
17868253	6.1839±0.27	5.784±0.04	6.1403±0.04	1.92025
17738283	5.2762±0.59	4.9399±0.18	5.0403±0.24	1.61367
17609825	5.7465±0.22	5.3386±0.12	5.0708±1.38	1.54069
17639411	7.9463±0.36	7.5565±0.14	6.9167±0.13	0.96238
17700634	5.181±0.35	4.775±0.34	5.2372±0.31	2.06252
17853811	9.6663±0.12	9.252±0.08	9.6479±0.22	1.98368
17603681	4.8791±0.76	4.6007±0.14	4.7085±0.37	1.63916
17600319	4.8275±0.82	4.5486±0.22	4.6564±0.94	1.78139
17867369	8.2792±0.14	7.8559±0.27	8.0638±0.42	1.75455
17774691	4.2402±0.26	3.8247±0.31	3.9206±0.15	1.58904
17690456	7.6967±0.15	7.285±0.09	7.4403±0.16	1.6739
17609967	6.312±0.64	5.9955±0.13	5.9537±0.66	1.53113
17602655	6.496±0.58	6.1214±0.45	6.0846±0.81	1.54239
17600833	8.2563±0.06	7.8222±0.34	8.2242±0.03	1.95536
17607183	5.3567±0.52	4.9943±0.2	5.7386±0.89	2.74127
17605051	5.4381±0.43	5.0679±0.06	5.2043±0.24	1.65941
17666609	6.7508±0.12	6.3385±0.07	6.4137±0.07	1.58
17608117	7.5215±0.13	7.1032±0.21	6.865±0.49	1.30137
17603895	4.8962±0.44	4.5176±0.2	4.7054±0.18	1.70735
17604045	5.2406±0.34	4.8344±0.34	4.4406±0.43	1.1508
17602175	6.4222±0.6	5.9498±0.92	6.7913±0.04	2.43819
17634722	3.5686±0.23	3.1348±0.43	3.2267±0.12	1.56698
17606973	6.3341±0.47	5.9073±0.63	5.9468±0.1	1.47333
17707443	4.422±0.28	4.0219±0.16	4.4389±0.62	2.08962
17760345	8.5415±0.58	8.2031±0.22	8.0402±0.39	1.35609
17769017	6.3863±0.23	5.9588±0.39	6.2758±0	1.83576
17606969	7.0254±0.28	6.602±0.4	6.7109±0.01	1.58733
17719655	6.7822±0.11	6.3706±0.07	6.6687±0.41	1.88025
17851250	3.9176±0.19	3.5118±0.05	3.6767±0.06	1.68196
17634776	4.5747±0.16	4.1676±0.01	4.1525±0.49	1.5282
17604529	4.9187±0.62	4.5929±0.17	4.5322±0.71	1.52136
17605399	8.6086±0.28	8.2051±0.22	8.3204±0.15	1.61982
17608167	6.3859±0.17	5.9364±0.5	6.683±0.68	2.5777
17615462	6.2774±0.48	5.8477±0.64	5.8444±0.04	1.42592
17609863	4.0892±0.47	3.7196±0.25	3.9844±0.85	1.94527
17834443	4.4494±0.26	4.0513±0.09	4.2185±0.07	1.68375
17608635	5.0119±0.52	4.6669±0.02	4.5836±0.04	1.41615
17606815	3.8796±0.32	3.4764±0.28	3.7873±0.37	1.87312
17742057	7.1566±0.26	6.6926±0.63	6.6169±0.22	1.36697
17844887	7.3072±0.19	6.8928±0.25	7.0804±0.01	1.69568
17719602	4.619±0.19	4.1962±0.33	4.5757±0.23	1.93752
17693836	4.1511±0.26	3.7449±0.24	3.6572±0.33	1.42087
17600919	6.8142±0.26	6.4188±0.02	7.1691±0.25	2.542
17601239	6.8142±0.26	6.4188±0.02	7.1691±0.25	2.542
17867711	5.9702±0.15	5.558±0.19	5.6889±0	1.63565
17870281	5.9702±0.15	5.558±0.19	5.6889±0	1.63565
17843405	3.27±0.19	2.8663±0.06	3.2611±0.04	1.97161
17600777	4.8779±0.77	4.5869±0.14	4.8153±0.23	1.76393
17602315	3.2487±0.39	2.8739±0.05	3.031±0.33	1.69395
17606367	7.7745±0.63	7.4444±0.24	7.9583±0.25	2.14305
17604195	5.4635±0.34	5.0106±0.63	4.5643±0.53	1.08603
17602057	6.4707±0.51	6.1203±0.08	6.0956±0.68	1.55601
17605031	6.1109±0.55	5.7673±0.07	5.8894±0.28	1.64727
17606539	5.325±0.81	5.0707±0.04	5.0545±0.1	1.48488
17757034	7.2205±0.19	6.8159±0.11	7.2714±0.09	2.05588
17869465	4.0579±0.52	3.6886±0.34	3.5958±1.01	1.55963
17600487	5.9468±0.56	5.5866±0.34	5.7481±0.07	1.65532
17809417	5.1614±0.37	4.7819±0.04	5.0383±0.05	1.79202
17778030	4.0581±0.28	3.6665±0.07	3.8028±0.12	1.65066
17841714	5.318±0.41	4.9452±0.09	5.6349±0.01	2.4171
17602515	7.4461±0.11	7.015±0.38	7.5261±0.04	2.10231
17868236	8.2065±0.21	7.787±0.34	7.8292±0.31	1.54115
17622568	4.758±0.42	4.2998±0.73	4.3237±0.15	1.43561
17870154	8.2002±0.21	7.7808±0.34	7.8151±0.31	1.53221
17859264	3.6204±0.44	3.2435±0.29	3.628±0.08	1.93948
17877147	5.7425±0.27	5.3447±0.19	5.5677±0.12	1.74634
17809654	9.6492±0.52	9.3053±0.01	9.0856±0.41	1.31379
17637630	5.7248±0.3	5.3377±0.01	5.4874±0.17	1.66994
17705521	3.3252±0.11	2.9177±0.1	3.0379±0.11	1.63097
17882859	3.3252±0.11	2.9177±0.1	3.0379±0.11	1.63097
17842132	8.6948±0.34	8.3138±0.01	8.2199±0.15	1.40933
17844687	8.6948±0.34	8.3138±0.01	8.2199±0.15	1.40933
17600039	4.8132±0.25	4.4177±0.1	4.7095±0.07	1.83504
17604237	7.0586±0.31	6.6711±0.08	6.5803±0.15	1.41119
17723744	3.5268±0.24	3.1325±0.03	3.1547±0.08	1.52413
17607221	4.1577±0.28	3.7311±0.46	3.6546±0.14	1.39006
17636374	8.442±0.25	8.0366±0.27	8.067±0.54	1.57244
17607759	5.3001±0.92	5.081±0.22	4.8207±0.22	1.25262
17609177	5.3001±0.92	5.081±0.22	4.8207±0.22	1.25262
17827983	4.521±0.17	4.1151±0.18	4.4541±0.44	1.93342
17606387	5.0422±0.41	4.6762±0	5.1481±0.5	2.14335
17600107	6.7662±0.29	6.3423±0.46	6.3286±0.47	1.48747
17602527	3.4896±0.14	3.0801±0.2	3.5955±0.09	2.13597
17774707	8.5076±0.07	8.0985±0.14	8.118±0.15	1.52059
17611477	4.5495±0.26	4.1573±0.02	4.8946±0.47	2.56736
17837153	4.7123±0.45	4.3517±0.13	4.3673±0.15	1.51728
17766983	4.5438±0.44	4.1327±0.52	4.0723±0.53	1.44094
17601995	6.2048±0.24	5.7826±0.41	6.1452±0.5	1.94703
17742567	4.6347±0.21	4.167±0.65	4.6248±0	1.96064
17850298	8.1691±0.23	7.7671±0.22	7.7462±0.16	1.47454
17601781	6.6973±0.41	6.2493±0.69	6.5903±0.17	1.80333
17605323	6.5175±0.25	6.1181±0.22	6.335±0.27	1.74876
17608225	5.8456±0.46	5.4168±0.64	4.9192±0.56	1.05115
17723195	5.973±0.14	5.5646±0.21	5.7353±0.17	1.68526
17690951	8.9291±0.36	8.5542±0.09	9.0482±0.08	2.11202
17665134	3.5327±0.55	3.199±0.01	3.4129±0.18	1.74656
17697236	5.6134±0.26	5.2183±0.2	5.7158±0.02	2.10811
17767175	3.1902±0.29	2.7986±0.19	2.6551±0.12	1.35432
17868172	7.4786±0.25	7.0883±0.04	7.2168±0.15	1.64391
17603095	6.5673±0.21	6.1583±0.29	6.5295±0.21	1.93116
17796677	6.8919±0.26	6.4914±0.25	6.7851±0.29	1.84311
17606785	3.4296±0.41	3.0652±0.08	3.5189±0.91	2.25999
17603857	6.3207±0.46	5.8338±0.88	5.9737±0.16	1.51447
17694641	3.9116±0.25	3.5182±0.15	3.7091±0.11	1.71004
17675009	5.792±0.73	5.4981±0.03	6.2058±0.13	2.4544
17603447	6.5005±0.73	6.1782±0.41	6.2762±0.16	1.57898
17600671	6.7983±0.25	6.3392±0.64	6.7648±0.01	1.91874
17610185	6.7983±0.25	6.3392±0.64	6.7648±0.01	1.91874
17631881	4.7841±0.22	4.3878±0.16	4.526±0.04	1.64617
17602685	6.5572±0.69	6.2502±0.13	6.2708±0.13	1.52142
17720696	3.328±0.44	2.9656±0.17	3.2388±0.26	1.82121
17609577	8.27±0.38	7.8906±0.25	7.9202±0.04	1.5196
17731342	5.9918±0.19	5.5912±0.18	6.0934±0.04	2.11636
17667996	3.6673±0.09	3.2607±0.18	3.1545±0.04	1.38823
17808770	9.414±0.21	8.9969±0.38	9.2528±0.02	1.76113
17607301	5.0036±0.27	4.6029±0.3	4.3198±0.68	1.28856
17755547	6.2934±0.37	5.9162±0.21	6.0043±0.1	1.58812
17781495	6.6362±0.17	6.1535±0.71	6.7014±0.01	2.06508
17601107	4.1978±0.51	3.8498±0.12	3.9589±0.2	1.62292
17601441	4.1978±0.51	3.8498±0.12	3.9589±0.2	1.62292
17732280	4.4297±0.26	4.0311±0.26	4.2346±0.1	1.71534
17868216	4.7624±0.41	4.3991±0.08	4.7306±0.22	1.89658
17833511	5.1198±0.31	4.739±0.06	4.5879±0.25	1.36025
17609259	5.2576±0.87	4.8775±0.99	4.9602±0.88	1.55151
17633537	7.0423±0.08	6.6413±0.07	6.4231±0.07	1.28953
17608735	7.0375±0.38	6.6627±0.19	7.2464±0.08	2.24012
17880230	6.5846±0.14	6.1664±0.35	6.5322±0.04	1.9054
17608647	4.3469±0.35	3.9741±0.06	4.1202±0.35	1.68381
17602733	7.5611±0.25	7.0863±0.72	7.3827±0.22	1.74249
17664365	5.5±0.38	5.1278±0.11	5.2025±0.12	1.58026
17723308	4.5139±0.29	4.1278±0.15	4.7453±0.26	2.31412
17600189	6.0493±0.3	5.6567±0.27	5.8393±0.17	1.694
17603387	5.5221±0.27	5.1379±0.03	5.427±0.38	1.86436
17601857	3.656±0.37	3.2569±0.42	3.254±0.16	1.46994
17604403	6.7485±0.45	6.3939±0.13	6.86±0.09	2.07006
17764628	6.2913±0.24	5.8305±0.66	6.6858±0.66	2.71549
17633463	5.8867±0.06	5.4868±0.03	5.7208±0.22	1.7744
17600163	4.9818±0.44	4.627±0.09	4.7302±0.29	1.62546
17674320	5.0025±1.47	4.9576±0.72	5.3444±0.08	1.84534
17643545	6.2956±0.13	5.8985±0.07	6.0258±0.06	1.63808
17602233	6.6673±0.34	6.2243±0.64	6.5817±0.06	1.83031
17718732	6.0576±0.16	5.6634±0.01	6.153±0.17	2.11306
17607345	4.1414±0.67	3.8428±0.18	3.722±0.38	1.3978
17600691	4.5938±0.72	4.2549±0.52	4.5293±0.13	1.75953
17610205	4.5938±0.72	4.2549±0.52	4.5293±0.13	1.75953
17851258	3.8257±0.1	3.4034±0.38	3.5543±0.03	1.63695
17609287	5.9399±0.5	5.5831±0.28	5.6778±0.64	1.66502
17817437	8.4442±0.42	8.0807±0.14	7.9023±0.57	1.37465
17688286	4.1263±0.18	3.7345±0.04	4.3672±0.05	2.32583
17755926	3.5014±0.14	3.09±0.31	3.2567±0.17	1.67028
17603311	4.489±0.63	4.1837±0.16	4.638±0.51	2.11206
17619114	3.7744±0.09	3.3766±0.03	3.3165±0.51	1.48443
17843357	3.2739±0.28	2.8891±0.15	3.153±0	1.79594
17604635	5.1156±0.29	4.6892±0.51	4.61±0.73	1.46436
17882903	4.8392±0.41	4.4794±0.01	4.4423±0.07	1.46282
17619324	5.3087±0.09	4.9115±0	5.3519±0.28	2.05425
17850026	3.8837±0.32	3.5±0.21	3.6054±0.01	1.60562
17868057	7.4263±0.32	7.0505±0.09	6.9404±0.18	1.39377
17868324	7.4263±0.32	7.0505±0.09	6.9404±0.18	1.39377
17787088	8.8444±0.4	8.4757±0.18	8.4089±0.18	1.43167
17629120	3.963±0.38	3.582±0.3	3.9906±0.23	1.9817
17605519	9.3175±0.41	8.9574±0.03	9.3182±0.1	1.92864
17822972	4.0132±0.25	3.6264±0.12	3.819±0.08	1.71243
17810435	5.6214±0.03	5.2227±0.01	5.3726±0.29	1.68077
17607487	3.7956±0.33	3.4148±0.19	3.7899±0.25	1.95192
17608905	3.7956±0.33	3.4148±0.19	3.7899±0.25	1.95192
17822866	9.0456±0.11	8.6461±0.15	9.179±0.05	2.16514
17759327	3.8101±0.12	3.4106±0.15	3.6112±0	1.7192
17602317	4.6745±0.16	4.267±0.29	4.3879±0.34	1.63738
17799762	3.1679±0.24	2.7828±0.02	2.9181±0.05	1.64782
17719626	4.6045±0.64	4.2988±0.07	4.2166±0.04	1.41622
17600333	7.5289±0.19	7.1353±0.14	7.2949±0.08	1.67267
17601085	5.1368±0.39	4.6906±0.7	4.922±0	1.6635
17601419	5.1368±0.39	4.6906±0.7	4.922±0	1.6635
17687316	3.8497±0.15	3.4356±0.36	3.5792±0.11	1.63441
17872079	4.4214±0.04	4.0242±0.02	4.2381±0.11	1.74193
17881549	4.1657±0.4	3.7581±0.53	4.2207±0.09	2.00029
17604915	3.4372±0.63	3.1365±0.05	3.0151±0.09	1.37992
17868197	6.6698±0.64	6.3561±0.12	5.8959±0.41	1.11027
17869485	6.6698±0.64	6.3561±0.12	5.8959±0.41	1.11027
17870285	6.6698±0.64	6.3561±0.12	5.8959±0.41	1.11027
17605911	3.2168±0.46	2.8684±0.12	2.8873±0.12	1.51982
17652947	7.4224±0.18	7.0249±0.22	6.8496±0.33	1.33801
17824116	8.2089±0.11	7.809±0.19	8.2232±0.28	2.00856
17806366	3.4751±0.27	3.0921±0.12	3.0624±0.08	1.4679
17654073	4.0865±0.48	3.7455±0.08	3.9561±0.15	1.73907
17684944	4.6122±0.13	4.2162±0.15	4.3841±0.22	1.69056
17716688	4.3286±0.71	4.0503±0.1	4.638±0.48	2.31546
17604597	5.6477±0.13	5.2282±0.4	5.7467±0.02	2.10766
17604247	3.4252±0.35	3.0455±0.25	2.9652±0.4	1.43488
17882555	7.3123±0.12	6.9045±0.31	7.3406±0.21	2.01778
17606097	6.1169±0.32	5.7396±0.18	5.9282±0.02	1.70288
17682600	6.1584±0.28	5.7599±0.35	5.944±0	1.67973
17600331	7.4455±0.45	7.0242±0.66	7.2856±0.01	1.70745
17775034	3.9762±0.31	3.6014±0.12	3.6852±0.07	1.5879
17768028	3.6016±0.21	3.2063±0.25	3.2631±0.05	1.54917
17790467	4.7901±0.2	4.3799±0.38	4.8668±0.25	2.08199
17608427	4.7394±0.77	4.4647±0.09	4.0669±0.05	1.13779
17608107	6.6799±0.1	6.262±0.39	6.4399±0.17	1.67257
17600061	5.8645±0.69	5.5838±0.16	6.1855±0.14	2.27438
17634922	3.8075±0.4	3.4466±0.15	3.3406±0.33	1.40804
17605879	6.5286±0.14	6.1299±0.22	6.5347±0.07	1.97509
17683569	3.4921±0.09	3.0899±0.23	3.1671±0.04	1.57228
17867409	7.0111±0.26	6.6263±0.18	6.788±0.22	1.68117
17854014	3.5676±0.5	3.2261±0.02	3.4161±0.04	1.71134
17646017	7.2088±0.27	6.7614±0.64	7.6291±0.1	2.60978
17605003	4.2502±0.5	3.9066±0.21	3.8403±0.02	1.42504
17814793	4.4659±0.47	4.1248±0.01	4.1421±0	1.51806
17609247	4.9668±0.3	4.5919±0.07	4.1366±0.45	1.12008
17620128	4.6412±0.33	4.2691±0.14	4.3321±0.05	1.56398
17719988	5.7357±0.48	5.3139±0.7	5.9402±0.52	2.25663
17602837	6.1613±0.27	5.7699±0.29	5.9313±0.02	1.66028
17694623	7.2813±0.1	6.8898±0.02	7.4605±0.01	2.22775
17607919	4.9736±0.54	4.5669±0.71	4.6629±0.11	1.51355
17619198	4.1162±0.31	3.7373±0.22	3.8543±0.05	1.61796
17698369	5.527±0.15	5.1389±0.04	5.4448±0.4	1.89059
17609373	4.8996±0.4	4.5407±0.08	4.5312±0.03	1.48904
17708400	5.3636±0.18	4.9757±0.11	5.1571±0	1.69857
17815740	3.2728±0.26	2.8946±0.08	3.0939±0.13	1.7243
17780672	5.6374±0.23	5.2561±0.07	5.7016±0.28	2.06034
17600231	6.6796±0.67	6.3763±0.3	6.5937±0.6	1.79988
17687455	4.6672±0.23	4.2803±0.2	4.5095±0.48	1.79768
17764604	3.9084±0.36	3.5423±0.14	3.9503±0.11	1.98836
17602313	4.8463±0.67	4.4855±0.67	5.213±0.27	2.37669
17700106	3.6326±0.22	3.2494±0.11	3.2765±0.03	1.52628
17842973	3.652±0.34	3.2815±0.17	3.4719±0.08	1.70719
17603775	4.2565±0.65	3.9269±0.49	5.3564±0.38	3.99246
17603621	3.8848±0.72	3.5989±0.31	3.9173±0.26	1.864
17815427	3.7184±0.34	3.3515±0.15	3.468±0.08	1.62325
17793415	3.7761±0.42	3.4247±0.09	3.4054±0.21	1.4867
17600693	4.0899±0.18	3.705±0.08	3.7342±0.06	1.53019
17610207	4.0899±0.18	3.705±0.08	3.7342±0.06	1.53019
17635616	9.784±0.51	9.4529±0.02	9.0024±0.11	1.09932
17748623	7.4007±0.18	7.0145±0.11	7.142±0	1.63619
17606229	5.7444±0.33	5.3305±0.53	5.686±0.19	1.864
17783118	4.4641±0.24	4.0754±0.25	4.0083±0.04	1.42163
17605461	4.1126±0.31	3.7278±0.31	4.275±0.21	2.17841
17683564	3.7994±0.31	3.4305±0.09	3.7603±0.03	1.8838
17662655	4.9824±0.51	4.6523±0.11	4.7438±0.01	1.59595
17611073	6.5085±0.15	6.1227±0.08	6.2201±0.68	1.69273
17624337	3.6204±0.12	3.2328±0.07	3.4962±0.02	1.79949
17605555	5.1244±0.61	4.7828±0.45	4.3561±0.09	1.09059
17605861	6.563±0.91	6.3204±0.37	6.1666±0.44	1.35791
17823484	5.1861±0.46	4.8295±0.28	5.294±0.67	2.16211
17882993	5.1861±0.46	4.8295±0.28	5.294±0.67	2.16211
17880611	4.4452±0.15	4.0585±0.1	4.3875±0.15	1.88693
17613529	7.1798±0.07	6.779±0.27	7.2076±0.32	2.02694
17619032	4.7874±0.59	4.4778±0.15	4.5564±0.29	1.59562
17605145	6.842±0.27	6.4545±0.29	7.1094±0.34	2.37087
17601631	3.4935±0.28	3.1198±0.13	3.0984±0.27	1.48805
17756036	5.8646±0.39	5.4717±0.46	5.7243±0.19	1.74947
17787099	7.9056±0.17	7.4768±0.52	6.4455±0.02	0.710776
17819852	5.3406±0.26	4.9631±0.16	4.774±0.31	1.32667
17635914	5.3791±0.56	5.0297±0.42	4.9964±0.17	1.44034
17766715	6.5726±0.09	6.1833±0.12	6.594±0.12	1.99428
17790639	5.962±0.11	5.565±0.26	5.7096±0.31	1.66443
17603541	7.3681±0.12	6.9798±0.14	7.4876±0.61	2.22291
17702348	4.305±0.32	3.9393±0.07	3.7926±0.08	1.35523
17606509	5.9449±0.17	5.5402±0.37	5.9162±0.35	1.9431
17853806	9.0923±0.19	8.7076±0.17	9.1858±0.01	2.08202
17604427	7.5197±0.33	7.1529±0.14	7.5221±0.27	1.95052
17762517	5.7309±0.26	5.3538±0.17	5.2599±0.16	1.40525
17600097	3.6265±0.53	3.2973±0.17	3.7464±0.22	2.05238
17868099	6.128±0.27	5.7553±0.11	5.7551±0.13	1.50096
17601623	5.9677±0.12	5.5837±0.05	5.6776±0.6	1.67089
17606185	5.6708±0.66	5.3803±0.07	5.7951±0.42	2.04197
17734813	6.1641±0.24	5.7743±0.31	6.0308±0.31	1.79245
17606879	4.2645±0.29	3.8594±0.47	4.2185±0.56	1.94593
17691431	6.8378±0.52	6.4966±0.32	6.8287±0	1.86594
17606893	6.001±0.4	5.6095±0.49	5.6665±0.36	1.54067
17848894	8.0734±0.19	7.6885±0.19	7.7509±0.4	1.58905
17605833	6.8861±0.16	6.5028±0.13	6.4052±0.23	1.40798
17613811	5.9187±0.17	5.5187±0.34	5.688±0.31	1.68255
17825015	3.6483±0.05	3.254±0.23	3.506±0.02	1.77507
17755177	4.1594±0.14	3.7766±0.1	4.2174±0.24	2.04778
17840111	6.2924±0.07	5.9073±0.06	6.0376±0.08	1.64221
17702503	3.2595±0.3	2.8957±0	2.8695±0.02	1.47304
17787129	6.0355±0.41	5.6773±0.25	5.3329±0.33	1.18736
17682216	4.7268±0.04	4.3398±0.11	5.0853±0.26	2.53227
17684372	8.9917±0.06	8.607±0.04	8.6857±0.16	1.58888
17635908	4.5231±0.14	4.1413±0.07	4.4443±0	1.84937
17738246	4.5013±0.76	4.2199±0.45	4.4046±0.21	1.67289
17828898	4.3946±0.57	4.0785±0.18	4.1387±0	1.55752
17618616	4.8586±0.07	4.4745±0.05	4.9592±0.27	2.11739
17708472	5.2545±0.08	4.8707±0.04	5.3752±0.01	2.12749
17711506	7.9492±0.06	7.4957±0.64	8.205±0.23	2.35242
17874259	4.8256±0.29	4.4589±0.08	4.5077±0.18	1.55675
17866738	4.0265±0.34	3.6666±0.1	3.8291±0	1.67676
17608775	3.475±0.55	3.1607±0.09	3.1993±0.05	1.53972
17600903	6.1701±0.22	5.7897±0.21	5.3725±1.1	1.28359
17601223	6.1701±0.22	5.7897±0.21	5.3725±1.1	1.28359
17645302	7.7799±0.19	7.3967±0.21	7.4725±0.18	1.57904
17609889	7.2724±0.24	6.898±0.15	7.0328±0.3	1.66042
17608505	4.0423±0.53	3.7002±0.32	4.2302±0.01	2.13956
17689022	4.5989±0.28	4.2316±0.08	4.4043±0.06	1.69003
17606911	5.2622±0.82	4.9785±0.62	4.8326±0.09	1.29752
17600585	3.5266±0.3	3.1529±0.25	3.3951±0.11	1.76282
17610099	3.5266±0.3	3.1529±0.25	3.3951±0.11	1.76282
17674327	5.8474±0.57	5.5327±0	5.3195±0.06	1.29443
17711526	6.0545±0.18	5.6735±0.18	5.7839±0.16	1.6181
17778973	6.8428±0.36	6.4748±0.28	6.5503±0.26	1.57854
17610267	6.203±0.14	5.8246±0.02	6.0687±0.2	1.78463
17868144	3.9737±0.23	3.6028±0.02	3.7028±0.26	1.62039
17797674	6.0987±0.11	5.7047±0.29	5.6372±0.34	1.43696
17619104	5.2361±0.24	4.8668±0	4.9514±0.07	1.59142
17699006	3.6242±0.34	3.2683±0.02	3.0699±0.3	1.32122
17749128	3.7121±0.13	3.3319±0.1	3.3708±0.04	1.53951
17606781	4.9453±0.35	4.5772±0.28	4.6638±0.72	1.67622
17634007	5.8603±0.14	5.4818±0.06	5.576±0.21	1.60865
17721373	7.4261±0.11	7.0145±0.43	7.4929±0.06	2.0449
17602135	5.0417±0.41	4.6285±0.63	5.0837±0.15	1.96903
17603617	5.6525±0.44	5.3166±0	5.3342±0.94	1.68328
17606943	5.8854±0.05	5.4989±0.17	6.3559±0.19	2.71905
17717650	4.8338±0.38	4.4847±0.04	4.8055±0.65	1.96882
17607833	5.4021±0.42	5.0161±0.5	5.6911±0.11	2.32724
17607885	5.4021±0.42	5.0161±0.5	5.6911±0.11	2.32724
17851313	3.7609±0.24	3.3784±0.29	3.6012±0.02	1.73302
17600029	4.0371±0.44	3.7029±0.07	3.5194±0.23	1.32842
17659670	4.5698±0.32	4.2059±0.2	4.5438±0.19	1.89428
17606543	7.5378±0.25	7.1654±0.17	7.6641±0.08	2.11377
17769389	8.6983±0.22	8.3278±0.09	8.393±0.43	1.60317
17808897	3.6835±0.5	3.3599±0.12	3.9128±0.55	2.27588
17783893	4.9734±0.53	4.6186±0.47	4.9727±0.61	1.95134
17637890	5.4447±0.5	5.1172±0.14	5.2385±0.69	1.72236
17801449	3.8882±0.4	3.5356±0.2	3.8233±0.03	1.82265
17607961	4.1577±0.35	3.8052±0.1	4.2633±0.14	2.06287
17828800	8.2514±0.4	7.9007±0.2	7.8781±0.36	1.492
17610416	3.8055±0.27	3.4393±0.11	3.4896±0.07	1.55177
17813585	3.3103±0.12	2.9313±0.11	3.5059±0.2	2.2414
17681327	8.071±0.29	7.6997±0.25	7.5768±0.21	1.37387
17872772	3.5531±0.3	3.1924±0.09	3.3869±0.33	1.73758
17795755	3.5963±0.31	3.2382±0.05	3.1265±0.25	1.39814
17791941	3.3215±0.06	2.9424±0	3.0339±0.04	1.5986
17875518	7.0029±0.47	6.6265±0.52	6.8086±0.91	1.81268
[truncated: 34,686 more rows]
[truncated: 2 more columns]

## Sheet: Supplemental Information 2
Probe Set ID	Mediated vs Model	Model group	Mediated group	Gene Symbol
17746221	3.0567	6.8376±0.2	7.676±1.09	Car3
17666805	2.93035	4.6254±0.01	5.5335±0.58	LOC100364657 // LOC100362139
17825058	2.92292	5.2089±0.21	6.1764±0.12	LOC100363779 // LOC691925
17720672	2.79306	5.9005±0.44	6.8166±0.29	Mir466d
17764628	2.71549	5.8305±0.66	6.6858±0.66	RGD1566059
17648372	2.69197	5.6482±0.25	6.497±0.19	Olr1513
17824888	2.65082	3.7666±0.28	4.5472±0.56	Igha
17771744	2.62663	4.3989±0.04	5.1967±0.25	Olr424
17872783	2.54306	3.8145±0.12	4.5631±0.3	LOC100364596 // LOC685340
17655114	2.53422	4.9856±0.04	5.7064±0.46	Hbq1
17682216	2.53227	4.3398±0.11	5.0853±0.26	Olr1590
17716731	2.5076	3.3675±0.22	4.093±0.37	Akr1c12
17664824	2.47048	5.365±0.11	6.0858±0.08	Ifitm7
17624368	2.4537	5.7163±0.07	6.4227±0.16	Olr384
17756099	2.42437	6.2171±1.02	7.0656±0.32	RT1-M1-2
17876019	2.42238	3.0097±0.16	3.7043±0.09	RGD1564613
17656054	2.4189	9.6883±1.16	10.5681±0.42	Rpl30
17806948	2.41498	6.2312±0.2	6.9093±0.3	Olr839
17611062	2.40805	6.3383±0.08	7.0125±0.24	Rps12
17665130	2.40261	5.9677±0.12	6.6421±0.21	Olr1546
17634774	2.38597	3.4672±0.07	4.1377±0.02	Olr27
17726824	2.37985	6.1043±0.23	6.7713±0.22	RGD1560815
17625472	2.36898	3.7384±0.35	4.3825±0.46	LOC679216
17626938	2.36605	4.6632±0.1	5.2831±0.48	Vom2r4
17771732	2.36283	3.2133±0.06	3.8646±0.17	Olr411
17704136	2.36077	4.628±0.05	5.282±0.07	LOC691988
17711506	2.35242	7.4957±0.64	8.205±0.23	Hand2
17879063	2.351	6.5228±0.2	7.1783±0.11	LOC685552
17645362	2.34981	4.1136±0.61	4.8086±0.31	Olr1400
17842243	2.34841	4.3118±0.25	4.9442±0.38	Olr1159
17613478	2.34228	5.3012±0.44	5.9692±0.21	Pla2g4c
17731602	2.33584	5.3117±0.25	5.9499±0.26	LOC100360591
17688286	2.32583	3.7345±0.04	4.3672±0.05	Ndufb4l1
17647342	2.32378	6.0658±0.04	6.5536±0.93	Aurkb
17648954	2.31903	4.8311±0.26	5.4196±0.55	Sebox
17767079	2.3178	3.7608±0.25	4.3986±0.08	LOC257643
17669332	2.31742	3.5753±0.13	4.1966±0.23	Stfa2l1
17792958	2.31642	5.6873±0.02	6.1893±0.86	Prokr1
17795527	2.31382	3.332±0.03	3.9551±0.11	Ly49si1
17654066	2.29697	3.2036±0.32	3.803±0.44	Olr1372
17619421	2.29599	3.2364±0.23	3.86±0.02	Olr264
17670122	2.29171	3.8617±0.15	4.4269±0.54	Kng1l1
17749162	2.28896	3.6987±0.12	4.2754±0.45	LOC100361349
17678973	2.28477	6.2617±0.48	6.9043±0.16	LOC100362927
17794426	2.28086	6.5309±0.34	7.1484±0.2	Ccdc77
17737660	2.27869	5.9752±0.13	6.5811±0.03	Terc
17624325	2.27611	3.9448±0.09	4.5427±0.17	Olr339
17629818	2.27498	4.0764±0.06	4.665±0.27	Vom1r48
17858023	2.27409	4.8569±0.05	5.4577±0.01	Mir30a
17825924	2.27064	4.1267±0.04	4.6772±0.53	Olr1064
17862724	2.26109	6.4131±0.04	7.0015±0.15	RGD620382
17828502	2.26022	5.1379±0.43	5.7094±0.55	RGD1561410
17774327	2.25897	4.5732±0.15	5.1664±0.08	Olr693
17619166	2.25449	3.7885±0.15	4.3222±0.58	Olr155
17697765	2.25391	4.0618±0.26	4.6612±0.01	RGD1562624
17620520	2.24984	3.8906±0.4	4.47±0.44	Paip2l1
17767371	2.24389	6.0096±0.15	6.5937±0.08	Defb20
17702253	2.24295	5.3667±0.22	5.9551±0.12	RGD1561152
17868721	2.24192	3.9102±0.32	4.4236±0.7	LOC689679
17854183	2.23965	5.0049±0.4	5.609±0.09	LOC100363141
17635528	2.2393	4.5587±0.13	5.1396±0.03	Olr51
17658479	2.23302	3.1612±0.12	3.7294±0.22	Olr1474
17858996	2.23117	6.0764±0.1	6.6209±0.42	RGD1562143
17654057	2.22497	3.6782±0.23	4.2227±0.44	Olr1368
17818092	2.22198	9.7732±0.67	10.401±0.31	Ifi27
17783095	2.22082	4.0163±0.27	4.5917±0.14	Olr821
17666384	2.21933	5.3739±0.17	5.9437±0.06	RGD1562415
17702334	2.21867	5.5491±0.09	6.1086±0.2	LOC691076
17784209	2.21825	5.6109±0.05	6.1758±0.11	LOC100362150 // LOC500161
17838196	2.2179	5.0974±0.62	5.7264±0.08	Cyp11b3
17791973	2.20992	4.6662±0.04	5.2229±0.12	LOC500181
17842284	2.2062	6.0528±0.07	6.5831±0.4	Olr1191
17640795	2.2006	4.7269±0.19	5.266±0.34	Olr321
17791947	2.19389	3.8446±0.22	4.3854±0.31	LOC100363832 // LOC690532
17692403	2.19035	3.4999±0.13	4.0331±0.31	LOC689701
17792025	2.1885	3.8654±0.36	4.3753±0.58	LOC502821 // LOC502817
17834351	2.18835	6.4298±0.09	6.953±0.37	Olr1092
17819477	2.18763	4.2658±0.07	4.8103±0.07	Mir153
17817470	2.18354	6.6048±0.21	7.1469±0.2	LOC685221
17611050	2.18243	5.3192±0.03	5.8377±0.36	Taar9
17647614	2.18048	5.0367±0.08	5.5774±0.02	RGD1560902
17880794	2.17951	5.2868±0.07	5.8048±0.36	LOC679715
17815078	2.17522	4.6157±0.43	5.1465±0.47	Rrm2
17701894	2.17137	3.9695±0.03	4.4164±0.72	Olr1625
17658498	2.17075	3.4755±0.3	4.024±0.04	Olr1498
17843399	2.16613	5.2939±0.23	5.8185±0.3	Olr1325
17779158	2.16347	3.8713±0.1	4.4003±0.08	Wfdc15a
17826616	2.16337	5.6594±0.1	6.1895±0.11	Odf3l2
17786978	2.15947	3.6749±0.1	4.2023±0.01	Clec4b2
17819328	2.15777	4.9643±0.05	5.489±0.04	LOC100360169
17750541	2.15244	5.4904±0.09	6.0126±0.03	Sypl2
17764640	2.14803	5.045±0.35	5.5843±0.05	Olr773
17867699	2.14682	5.6784±0.27	6.1551±0.56	LOC100361721 // LOC100360461 // LOC691773 // LOC691595 // LOC689827 // LOC689612 // LOC689418 // LOC688572 // LOC685817 // LOC685344 // LOC684990 // LOC680453 // LOC679587 // LOC501477 // LOC501421 // LOC501362 // LOC501315 // LOC501306
17843290	2.14603	4.4634±0.03	4.9725±0.21	Olr1237
17780324	2.14556	5.3234±0.08	5.8389±0.11	LOC100362875
17871023	2.1446	4.9876±0.11	5.4525±0.56	LOC691895
17778313	2.1439	4.7915±0.2	5.2987±0.29	Defb23
17880174	2.14245	6.7502±0.15	7.2607±0.21	LOC100912676
17629378	2.1411	4.3422±0.3	4.8403±0.42	Olr8
17851323	2.14011	6.1265±0.6	6.6824±0.33	RGD1311744
17741566	2.13276	5.4188±0.05	5.8878±0.48	RGD1562344
17698125	2.12732	9.3861±0.03	9.8903±0.01	Rnase4
17880579	2.12179	6.4812±1.15	7.1894±0.24	Pkib
17825892	2.1194	4.6204±0.31	5.114±0.36	Olr990
17618616	2.11739	4.4745±0.05	4.9592±0.27	Mir326
17795684	2.11705	4.7354±0.07	5.2008±0.43	Ly49i7
17636003	2.11689	4.1876±0.1	4.6855±0.07	Olr278
17850016	2.11676	3.3263±0.12	3.7954±0.4	Olr1151
17851275	2.11564	3.9852±0.01	4.4224±0.59	LOC681204 // RGD1560570
17781280	2.1154	5.3377±0.63	5.8805±0.34	LOC679832
17638641	2.11379	6.2517±0.01	6.7427±0.15	Ins2
17612673	2.11281	3.7893±0.18	4.2747±0.29	Vom1r29
17698080	2.11237	4.0767±0.44	4.5905±0.28	Olr1627
17720404	2.10849	4.8374±0.08	5.328±0.1	RGD1564347 // RGD1560301
17861679	2.10753	6.8368±0.18	7.3319±0.07	Olr1353
17693074	2.10703	6.8958±0.41	7.3895±0.39	Bmp3
17613189	2.10532	6.0434±0.17	6.5047±0.44	Tnnt1
17624279	2.10297	4.4713±0.1	4.9539±0.19	LOC691074
17666531	2.10113	4.8537±0.59	5.3711±0.41	LOC100360091
17678158	2.10056	5.0522±0.12	5.524±0.31	Oas1h
17854179	2.09855	4.5681±0.22	5.0604±0.04	LOC367117
17789098	2.09752	5.0139±0.17	5.4974±0.17	LOC688874
17715374	2.0966	4.2815±0.04	4.7412±0.37	Serpinb9e
17779237	2.09606	5.3693±0.06	5.8489±0.15	Spinlw1
17870660	2.09419	4.8553±0.1	5.3298±0.22	RGD1566184
17795541	2.08872	3.4816±0.13	3.9222±0.48	Ly49si2
17660263	2.08656	4.88±0.27	5.3683±0.07	LOC100365330
17761775	2.08498	4.8141±0.14	5.2614±0.43	Olr407
17652713	2.0847	6.3068±0.07	6.7777±0.17	Tsen54
17619456	2.08319	6.2203±0.53	6.7362±0.19	Rpl27a
17838231	2.08148	4.5608±0.16	5.0285±0.23	Ly6b
17845280	2.08145	6.4458±0.58	6.9732±0.13	Ns5atp9
17824062	2.08006	4.5262±0.21	5.004±0.08	LOC690319
17640855	2.07921	5.0941±0.05	5.5557±0.24	Olr358
17656349	2.07508	5.4295±0.11	5.8977±0.12	Nmur2
17759507	2.07398	4.3405±0.27	4.8153±0.18	RT1-CE16
17793478	2.0733	7.8505±0.82	8.4314±0.11	Aer61
17705562	2.07317	6.6349±0.18	7.1051±0.11	LOC100362373 // LOC100360275 // LOC687444 // LOC685032 // LOC290156
17612951	2.07057	6.3587±0.11	6.8247±0.08	Zfp787
17698738	2.06987	5.5089±0.42	6.0009±0.13	Dhrs2
17872937	2.06888	5.9623±0.27	6.4374±0.07	RGD1561086
17640857	2.06878	4.56±0.29	5.0386±0.01	Olr360
17755975	2.06827	5.74±0.54	6.2512±0.12	Olr1731
17658487	2.06739	3.548±0.13	3.975±0.47	Olr1486
17629824	2.06622	4.847±0.45	5.3419±0.09	LOC682835
17839486	2.06534	7.0834±0.04	7.5405±0.16	Cyp2d1
17653988	2.06435	3.8972±0.3	4.3683±0.18	Olr1355
17700634	2.06252	4.775±0.34	5.2372±0.31	Mir92a-1
17791827	2.06165	4.795±0.39	5.2794±0.04	LOC690118
17784202	2.06091	4.3986±0.25	4.8673±0.06	LOC100362003
17622003	2.05931	3.7502±0.12	4.2098±0.01	Olr310
17876887	2.05746	3.7455±0.02	4.2015±0.1	LOC685762
17613537	2.05721	4.7719±0.02	5.2264±0.09	Obox6
17757034	2.05588	6.8159±0.11	7.2714±0.09	RGD1306917
17764929	2.05492	6.1635±0.07	6.6149±0.15	Phgr1
17649611	2.05459	4.6695±0.07	5.1071±0.31	Expi
17637412	2.0545	6.2997±0.23	6.7629±0.03	2014-09-01
17619324	2.05425	4.9115±0.11	5.3519±0.28	Olr214
17640853	2.0539	2.8839±0.06	3.335±0.13	Olr349
17711454	2.05307	7.118±0.08	7.5703±0.1	LOC100360260
17633289	2.05286	4.8727±0.22	5.3209±0.27	Mrgprb13
17629015	2.05256	3.0007±0.08	3.4543±0.01	Vom1r15
17614499	2.05253	5.7605±0.16	6.2163±0.08	Cyp2b2
17721892	2.05237	5.8054±0.38	6.2707±0.27	RGD1559877
17878906	2.04974	4.1152±0.06	4.5542±0.27	LOC100361139
17795489	2.04966	4.1597±0.11	4.6099±0.12	Klra17
17879637	2.04865	3.9252±0.05	4.3721±0.14	Mir878
17734734	2.04593	6.1033±0.24	6.548±0.27	Olr386
17676615	2.04548	4.2866±0.02	4.734±0.02	Vom2r62
17721373	2.0449	7.0145±0.43	7.4929±0.06	RGD1565635
17661173	2.0445	4.4756±0.22	4.8724±0.58	Krt33a
17774297	2.04424	2.748±0.19	3.1839±0.32	Olr668
17879617	2.04278	4.7447±0.18	5.1898±0.18	Mir743a
17774182	2.04256	4.3292±0.07	4.7687±0.2	Olr533
17871263	2.0422	5.1995±0.11	5.646±0.06	Mir188
17695001	2.04076	5.7266±0.36	6.1912±0.1	LOC679766
17717751	2.03996	4.5765±0.13	4.9926±0.42	Olr1653
17782909	2.03769	4.0545±0.57	4.5504±0.07	Prss1
17752400	2.03629	5.3579±0.31	5.8155±0.01	RT1-M10-1
17785389	2.03514	3.1885±0.09	3.5093±0.85	Vom1r96
17719249	2.03079	4.4088±0.31	4.8453±0.31	Prl2c1
17651020	2.02994	4.5498±0.12	4.9821±0.2	LOC680428
17836105	2.02952	5.4908±0.08	5.9278±0.04	LOC100362798
17619335	2.02938	4.5281±0.07	4.9585±0.19	Olr231
17626410	2.02837	4.0399±0.03	4.4736±0.1	Ins1
17784879	2.02812	5.5879±0.14	6.0257±0.07	Atp6v1b1
17672417	2.02757	3.7525±0.29	4.1909±0.26	RGD1562319 // RGD1564217
17752298	2.02708	3.5983±0.47	4.0705±0.03	Olr1710
17858292	2.02672	5.3537±0.32	5.7964±0.23	Tesp1
17878978	2.02632	4.7098±0.03	5.1426±0.08	LOC100362891
17651336	2.02371	4.2999±0.05	4.7303±0.11	Psme3 // Aoc3 // G6pc
17651101	2.02322	6.3503±0.2	6.7751±0.29	Hspb9
17843389	2.02258	3.6846±0.11	4.0468±0.65	Olr1318
17634778	2.01853	5.032±0.08	5.4607±0.06	Olr32
17842282	2.01773	6.5172±0.05	6.9448±0.06	LOC100361194
17750766	2.0163	4.1206±0.18	4.5465±0.19	Amy2
17867489	2.01623	6.1953±0.21	6.6274±0.11	LOC501233
17641744	2.01571	6.2516±0.04	6.6609±0.32	Fgfbp3
17775321	2.01522	3.503±0.21	3.9347±0.1	Olr785
17843235	2.01504	4.6599±0.01	5.0853±0.05	Olr1203
17843391	2.01457	2.8643±0.06	3.2891±0.09	Olr1319
17623357	2.01288	4.2582±0.11	4.6715±0.25	Mir192
17867548	2.01135	4.0495±0.07	4.4694±0.16	Emr4
17614591	2.01091	5.5388±0.26	5.9737±0.01	Cyp2a1
17756943	2.01017	8.445±0.05	8.8578±0.24	Wdr46
17670070	2.00942	3.4407±0.13	3.841±0.38	Mir28
17871613	2.00941	5.5972±0.06	6.0191±0.05	LOC100912877
17629100	2.00841	3.3697±0.44	3.8152±0.22	Vom2r15
17767388	2.0083	5.504±0.05	5.9218±0.15	Defb36
17697206	2.00691	6.0201±0.24	6.4415±0.23	Kcnk16
17824957	2.00576	3.3142±0.1	3.7348±0.04	RGD1565133
17630445	2.00525	7.9234±0.42	8.3717±0.07	Zfp61
17787117	2.00406	5.0672±0.18	5.4903±0.06	Mir3575
17851268	2.0039	3.2999±0.07	3.7134±0.17	Olr1297
17645573	2.00379	5.848±0.29	6.2561±0.38	Olr1409
17667478	2.00287	4.1398±0.25	4.5675±0.03	Lipi
17648841	2.00237	6.4283±0.07	6.8458±0.01	Foxn1
17774136	2.00166	3.4283±0.07	3.7928±0.55	Olr493
17698060	2.00098	4.1416±0.42	4.587±0.05	Tlr11
17843531	0.47317	7.7534±2.05	6.6731±0.53	Mfrp
17638626	0.453191	8.3477±1.48	6.9679±0.14	Igf2
17664742	0.449034	7.5014±1.76	6.1965±0.53	Clic6
17681515	0.445162	7.661±2.34	6.6468±0.57	F5
17784822	0.424805	7.6615±2.41	6.5851±0.74	Slc4a5
17698340	0.376524	6.0888±0.72	4.1811±0.08	LOC100365782
17675342	0.365109	8.0018±2.43	6.7015±0.8	Kl
17721778	0.356519	10.71±3.03	9.1842±2.12	Ttr
17866251	0.318734	8.011±2.44	6.5906±0.46	Kcnj13
17702459	0.0696213	7.2523±0.99	2.9878±0.03	LOC100365379

## Sheet: Supplemental Information 3
Differential Expression Genes(DEGs)	Transcription Factor(TF)
Ttr	GATA-1
Ttr	LHX3b/Lhx3b
Ttr	LHX3a/Lhx3a
Ttr	RFX1
Ttr	Cdc5
Ttr	Evi-1
Ttr	RORalpha2
Ttr	C/EBPalpha
Ttr	CHOP-10
Ttr	Cart-1
Mmp9	PPAR-alpha
Mmp9	PPAR-gamma2
Mmp9	PPAR-gamma1
Mmp9	Pax-2
Mmp9	Pax-2a
Mmp9	Oct-B1
Mmp9	oct-B2
Mmp9	oct-B3
Mmp9	POU2F1
Mmp9	POU2F1a
Aer61	SRF
Aer61	SRF(504 AA)
Aer61	Pbx1a
Aer61	ATF
Aer61	POU3F2
Aer61	POU3F2(N-Oct-5a)
Aer61	POU3F2(N-Oct-5b)
Aer61	RORalpha1
Aer61	TBP
Aer61	TFIID
Aox3 // Aox4	Pax-4a
Aox3 // Aox4	Evi-1
Aox3 // Aox4	C/EBPalpha
Aox3 // Aox4	Pax-2
Aox3 // Aox4	Pax-2a
Aox3 // Aox4	POU3F2
Aox3 // Aox4	POU3F2(N-Oct-5a)
Aox3 // Aox4	POU3F2(N-Oct-5b)
Aox3 // Aox4	c-Myc
Aox3 // Aox4	Max1
Aspa	POU3F2(N-Oct-5b)
Aspa	POU3F2
Aspa	POU3F2(N-Oct-5a)
Aspa	PPAR-gamma1
Aspa	PPAR-gamma2
Aspa	HNF-1
Aspa	HNF-1A
Aspa	PPAR-alpha
Aspa	ZID
Aspa	SRF
Cfh	RORalpha2
Cfh	POU2F1a
Cfh	POU2F1
Cfh	HNF-3beta
Cfh	HNF-1
Cfh	HNF-1A
Cfh	Nkx6-1
Cfh	FOXC1
Cfh	C/EBPbeta
Cfh	POU6F1(c2)
Clic6	PPAR-gamma1
Clic6	PPAR-gamma2
Clic6	STAT1
Clic6	STAT1alpha
Clic6	STAT1beta
Clic6	STAT2
Clic6	STAT3
Clic6	STAT4
Clic6	STAT5A
Clic6	STAT5B
Cyp11b3	Brachyury
Cyp11b3	Pax-5
Cyp11b3	AREB6
Cyp11b3	AhR
Cyp11b3	HNF-4alpha1
Cyp11b3	HNF-4alpha2
Cyp11b3	STAT1
Cyp11b3	STAT1alpha
Cyp11b3	STAT1beta
Cyp11b3	STAT2
Cyp2a2	POU2F1
Cyp2a2	POU2F1a
Cyp2a2	Sox9
Cyp2a2	C/EBPalpha
Cyp2a2	C/EBPbeta
Cyp2a2	HOXA5
Cyp2a2	Olf-1
Cyp2a2	STAT5A
Cyp2a2	POU3F1
Cyp2a2	NCX/Ncx
Cyp2j4	Olf-1
Cyp2j4	SRY
Cyp2j4	RelA
Cyp2j4	E4BP4
Cyp2j4	ATF-2
Cyp2j4	CRE-BP1
Cyp2j4	YY1
Cyp4f5	MRF-2
Cyp4f5	HOXA9
Cyp4f5	HOXA9B
Cyp4f5	Meis-1
Cyp4f5	Meis-1b
Cyp4f5	XBP-1
Cyp4f5	TGIF
Cyp4f5	Elk-1
Cyp4f5	ARP-1
Cyp4f5	C/EBPalpha
Dusp12	Pax-2
Dusp12	Pax-2a
Dusp12	ATEB6
Dusp12	YY1
Dusp12	Nkx2-2
Dusp12	MIF-1
Dusp12	HOXA5
Dusp12	AP-1
Dusp12	c-Fos
Dusp12	c-Jun
Fgf10	Pax-3
Fgf10	HOXA9B
Fgf10	Meis-1
Fgf10	Meis-1b
Fgf10	HOXA9
Fgf10	Ik-3
Fgf10	Meis-1a
Fgf10	POU6F1(c2)
Fgf10	PPAR-alpha
Fgf10	PPAR-gamma1
Igf2	SRF
Igf2	SRF(504 AA)
Igf2	MAF-1
Igf2	RREB-1
Igf2	Brachyury
Igf2	SREBP-1a
Igf2	SREBP-1b
Igf2	SREBP-1c
Igf2	RP58
Igf2	CP2
Ins1	POU6F1(c2)
Ins1	HNF-1A
Ins1	HNF-1
Ins1	STAT5A
Ins1	Nkx6-1
Ins1	Nkx2-5
Ins1	Pbx1a
Ins1	Nkx2-2
Ins1	LHX3a/Lhx3a
Ins1	LHX3b/Lhx3b
Kcnj13	C/EBPalpha
Kcnj13	CHOP-10
Kcnj13	RORalpha2
Kcnj13	Evi-1
Kcnj13	Pax-6
Kcnj13	HFH-1
Kcnj13	E4BP4
Kcnj13	Cdc5
Kcnj13	IRF-7A
Kcnj13	ATF6
Kl	c-Myb
Kl	Arnt
Kl	AhR
Kl	PPAR-gamma1
Kl	PPAR-gamma2
Kl	IRF-2
Kl	Nkx6-1
Kl	S8
Kl	POU3F1
Kl	POU6F1(c2)
Lss	Arnt
Lss	POU6F1
Lss	c-Myc
Lss	Max
Lss	MRF-2
Lss	p53
Lss	POU3F1
Lss	Meis-1
Lss	Meis-1a
Lss	Meis-1b
Mt1a	COMP1
Mt1a	TBP
Mt1a	GR
Mt1a	GR-alpha
Mt1a	POU2F1
Mt1a	POU2F1a
Mt1a	c-Myb
Mt1a	USF-1
Mt1a	USF-1:USF-2
Mt1a	USF1
Mx2	ITF-2
Mx2	Tal-1beta
Mx2	STAT5A
Mx2	CP2
Mx2	HSF1(long)
Mx2	E47
Mx2	Tal-1
Mx2	HEN1
Mx2	GR
Nmur2	POU2F1
Nmur2	POU2F1a
Nmur2	FOXF2
Nmur2	CUTL1
Nmur2	Brachyury
Nmur2	En-1
Nmur2	FOXO4
Nmur2	MRF-2
Nmur2	Evi-1
Nmur2	Ik-3
Npas4	NRSF form 1
Npas4	NRSF form 2
Npas4	c-Myb
Npas4	aMEF-2
Npas4	MEF-2A
Npas4	SRF
Npas4	SRF(504 AA)
Npas4	Bach1
Npas4	Nkx5-1
Npas4	RFX1
Nqo2	LCR-F1
Nqo2	PPAR-gamma2
Nqo2	PPAR-gamma1
Nqo2	COMP1
Nqo2	RelA
Nqo2	RFX1
Nqo2	c-Rel
Nqo2	HNF-4alpha1
Nqo2	HNF-4alpha2
Nqo2	HOXA9
Pcdhb13	Arnt
Pcdhb13	Tal-1
Pcdhb13	E47
Pcdhb13	ITF-2
Pcdhb13	Tal-1beta
Pcdhb13	LCR-F1
Pcdhb13	c-Myc
Pcdhb13	Max
Pcdhb13	Nkx2-2
Pcdhb13	Evi-1
Pkib	CUTL1
Pkib	POU3F2(N-Oct-5a)
Pkib	POU3F2(N-Oct-5b)
Pkib	POU3F2
Pkib	MRF-2
Pkib	POU6F1(c2)
Pkib	Evi-1
Pkib	NF-E2
Pkib	NF-E2 p45
Pkib	AP-1
Rasl11a	IRF-2
Rasl11a	c-Rel
Rasl11a	Msx-1
Rasl11a	ATF-2
Rasl11a	p53
Rasl11a	RSRFC4
Rasl11a	aMEF-2
Rasl11a	MEF-2A
Rasl11a	Lmo2
Rasl11a	C/EBPalpha
Rnase4	HNF-1
Rnase4	HNF-1A
Rnase4	IRF-2
Rnase4	IRF-1
Rnase4	STAT5B
Rnase4	NF-E2
Rnase4	NF-E2 p45
Rnase4	PPAR-gamma1
Rnase4	PPAR-gamma2
Rnase4	Sp1
Rps12	c-Myc
Rps12	Max1
Rps12	Nkx5-1
Rps12	Max
Rps12	POU2F1
Rps12	POU2F1a
Rps12	USF-1
Rps12	USF1
Rps12	Arnt
Rps12	YY1
Rps9	COMP1
Rps9	PPAR-gamma2
Rps9	PPAR-gamma1
Rps9	HEN1
Rps9	GATA-1
Rps9	COUP
Rps9	COUP-TF
Rps9	COUP-TF1
Rps9	HNF-4alpha1
Rps9	HNF-4alpha2
Slc16a13	ARP-1
Slc16a13	CRE-BP1
Slc16a13	ATF-2
Slc16a13	AhR
Slc16a13	Arnt
Slc16a13	HTF
Slc16a13	SRF
Slc16a13	SRF(504 AA)
Slc16a13	SREBP-1a
Slc16a13	SREBP-1b
Slc4a5	Roaz
Slc4a5	SEF-1(1)
Slc4a5	HSF1(long)
Slc4a5	HSF1short
Slc4a5	AREB6
Slc4a5	YY1
Slc4a5	USF-1
Slc4a5	USF-1:USF-2
Slc4a5	USF1
Slc4a5	USF2
Smndc1	Arnt
Smndc1	GATA-1
Smndc1	Pbx1a
Smndc1	CUTL1
Smndc1	SREBP-1a
Smndc1	SREBP-1b
Smndc1	SREBP-1c
Smndc1	c-Myc
Smndc1	Max
Smndc1	HNF-1
Sostdc1	POU2F1
Sostdc1	POU2F1a
Sostdc1	Roaz
Sostdc1	Pax-6
Sostdc1	Nkx2-2
Sostdc1	AhR
Sostdc1	Arnt
Sostdc1	RFX1
Sostdc1	E4BP4
Sostdc1	HNF-1
Spag11c	GATA-1
Spag11c	NCX/Ncx
Spag11c	C/EBPalpha
Spag11c	AP-1
Spag11c	Zic1
Spag11c	Pax-4a
Spag11c	AP-2rep
Spag11c	C/EBPalpha
Spag11c	CREB
Spag11c	deltaCREB
Thrsp	Bach2
Thrsp	p53
Thrsp	CUTL1
Thrsp	SREBP-1a
Thrsp	SREBP-1b
Thrsp	SREBP-1c
Thrsp	XBP-1
Thrsp	POU3F2
Thrsp	POU3F2(N-Oct-5a)
Thrsp	POU3F2(N-Oct-5b)
Tnnt1	GCNF-2
Tnnt1	GCNF
Tnnt1	GCNF-1
Tnnt1	NRSF form 1
Tnnt1	NRSF form 2
Tnnt1	AhR
Tnnt1	Arnt
Tnnt1	Pax-6
Tnnt1	MRF-2
Tnnt1	Elk-1
Zbtb16	IRF-7A
Zbtb16	ATF6
Zbtb16	HOXA9
Zbtb16	HOXA9B
Zbtb16	Meis-1
Zbtb16	Meis-1a
Zbtb16	Roaz
Zbtb16	c-Myb
Zbtb16	CREB
Zbtb16	deltaCREB
Chac2	GATA-1
Chac2	aMEF-2
Chac2	MEF-2A
Chac2	POU2F2
Chac2	POU2F2(Oct-2.1)
Chac2	POU2F2B
Chac2	POU2F2C
Chac2	Oct-B1
Chac2	oct-B2
Chac2	oct-B3
Clec4a	RP58
Clec4a	Nkx3-1
Clec4a	Nkx3-1 v1
Clec4a	Nkx3-1 v2
Clec4a	Nkx3-1 v3
Clec4a	Nkx3-1 v4
Clec4a	Pax-2b
Clec4a	Pax-2
Clec4a	Pax-2a
Clec4a	POU3F2
F5	PPAR-gamma1
F5	PPAR-gamma2
F5	ER-alpha
F5	Sp1
Gpatch4	SREBP-1a
Gpatch4	SREBP-1b
Gpatch4	SREBP-1c
Gpatch4	Zic3
Gpatch4	YY1
Gpatch4	Zic1
Gpatch4	Roaz
Gpatch4	c-Fos
Gpatch4	c-Jun
Gpatch4	AP-1
Hbb	Bach1
Hbb	STAT3
Hbb	IRF-1
Hbb	p53
Ifi27	IRF-7A
Ifi27	STAT1
Ifi27	STAT1alpha
Ifi27	STAT1beta
Ifi27	STAT5A
Ifi27	IRF-1
Krt18	Nkx3-1
Krt18	Nkx3-1 v1
Krt18	Nkx3-1 v2
Krt18	Nkx3-1 v3
Krt18	Nkx3-1 v4
Krt18	STAT3
Krt18	GATA-1
Krt18	HNF-4alpha1
Krt18	HNF-4alpha2
Krt18	p53
Krt33a	AREB6
Krt33a	C/EBPalpha
Krt33a	Pax-5
Krt33a	Chx10
Krt33a	MRF-2
Krt33a	C/EBPbeta
Krt33a	NCX/Ncx
Krt33a	Bach2
Krt33a	GATA1
Krt33a	GATA2
Mfrp	Chx10
Ngf	NF-kappaB
Ngf	NF-kappaB1
Ngf	CREB
Ngf	deltaCREB
Ngf	AP-1
Ngf	c-Jun
Ngf	c-Fos
Ngf	FAC1
Ngf	NF-1
Ngf	NF-1/L
Nts	c-Fos
Nts	SRF
Nts	SRF(504 AA)
Nts	GR-beta
Nts	GR-alpha
Nts	GR
Nts	Elk-1
Nts	MyoD
Nts	CREB
Nts	deltaCREB
Pla2g4c	NRSF form 1
Pla2g4c	NRSF form 2
Rgs13	STAT1
Rgs13	STAT1alpha
Rgs13	STAT1beta
Slc19a3	Sp1
Slc2a9	Pax-2
Slc2a9	Pax-2a
Slc2a9	LUN-1
Slc2a9	Ik-3
Slc2a9	Pax-5
Slc2a9	Pax-6
Slc2a9	POU2F1
Slc2a9	POU2F1a
Cks1bp6 // Cks1b	c-Myb
Ctsr	RFX1
Ctsr	Pax-2
Ctsr	Pax-2a
Ctsr	ARP-1
Ctsr	RP58
Ctsr	HNF-4alpha1
Ctsr	SREBP-1c
Ctsr	SREBP-1a
Ctsr	SREBP-1b
Ctsr	GATA-1
Fpr-rs3	ATF
Fpr-rs3	NF-kappaB
Fpr-rs3	NF-kappaB1
Fpr-rs3	FOXO4
Fpr-rs3	FOXO3
Fpr-rs3	FOXO3a
Fpr-rs3	FOXO1
Fpr-rs3	FOXO1a
Fpr-rs3	ATF
Fpr-rs3	AP-1
Fpr-rs3	c-Jun
Fpr-rs3	STAT3
Hba-a2	AP-1
Hba-a2	CREB
Hba-a2	deltaCREB
Hba-a2	c-Myb
Hba-a2	HNF-4alpha1
Hba-a2	Bach1
Hba-a2	c-Fos
Hba-a2	c-Jun
Hba-a2	HNF-4alpha2
Hba-a2	ER-alpha
Hba-a2	Bach1
Hba-a2	c-Myb
Hba-a2	AP-1
Hba-a2	c-Jun
Ifitm7	STAT1
Ifitm7	STAT1alpha
Ifitm7	STAT1beta
Ifitm7	GATA-6
Ifitm7	Egr-1
Ifitm7	ISGF-3
Ifitm7	STAT3
Ifitm7	GR
Ifitm7	GR-alpha
Ifitm7	GR-beta
Ifitm7	Egr-1
Ifitm7	GATA-6
Ifitm7	STAT1
Ifitm7	STAT1alpha
Ifitm7	STAT1beta
Ifitm7	GR
Ifitm7	GR-alpha
Ifitm7	GR-beta
Ifitm7	STAT3
Ifitm7	PPAR-gamma1
Mug2	Nkx2-2
Naip5	NF-kappaB1
Naip5	NF-kappaB
Naip5	STAT5A
Naip5	STAT5B
Naip5	STAT6
Naip5	HTF
Naip5	STAT1
Naip5	STAT1alpha
Naip5	STAT1beta
Naip5	STAT2
Ptgdrl	SRF
Ptgdrl	SRF(504 AA)
Ptgdrl	E4BP4
Ptgdrl	Nkx5-1
Ptgdrl	Brachyury
Ptgdrl	NRSF form 1
Ptgdrl	NRSF form 2
Ptgdrl	GR-alpha
Ptgdrl	GR-beta
Ptgdrl	GR
RGD1559708	Pax-4a
RGD1559708	FOXD1
RGD1559708	YY1
RGD1559708	RP58
RGD1559708	FOXF2
RGD1559708	E47
RGD1559708	Tal-1beta
RGD1559708	C/EBPalpha
RGD1559708	FOXO3
RGD1559708	FOXO3a
RGD1560997	STAT5A
RGD1560997	E2F
RGD1560997	E2F-1
RGD1560997	HOXA3
RGD1560997	Msx-1
RGD1560997	Pax-4a
RGD1560997	Nkx2-5
RGD1560997	Hlf
RGD1560997	GATA-1
RGD1560997	GR
RGD1561310	NF-kappaB1
RGD1561310	NF-kappaB
RGD1561310	STAT5A
RGD1561310	NRF-2
RGD1561310	NCX/Ncx
RGD1561310	HTF
RGD1561310	XBP-1
RGD1561310	Elk-1
RGD1561310	LyF-1
RGD1561310	HEN1
RGD1562415	PPAR-gamma1
RGD1562415	PPAR-gamma2
RGD1562415	COUP
RGD1562415	COUP-TF
RGD1562415	COUP-TF1
RGD1562415	HNF-4alpha1
RGD1562415	HNF-4alpha2
RGD1562415	ATF6
RGD1562415	XBP-1
RGD1562415	RORalpha2
RGD1563958	TBP
RGD1563958	TFIID
RGD1564126	Lmo2
RGD1564126	MyoD
RGD1564126	ITF-2
RGD1564126	AML1a
RGD1564126	GATA-3
RGD1564126	GATA-2
RGD1564126	STAT3
RGD1564126	c-Myb
RGD1564126	IRF-1
RGD1564126	STAT5A
RGD1564469	AP-1
RGD1564469	c-Fos
RGD1564469	c-Jun
RGD1564469	STAT5A
RGD1564469	SRF
RGD1564469	SRF(504 AA)
RGD1564469	GR-beta
RGD1564469	GR
RGD1564469	GR-alpha
RGD1564469	PPAR-gamma1
RGD1564613	FOXO1
RGD1564613	FOXO1a
RGD1564613	FOXF2
RGD1564613	FOXD1
RGD1564613	GR
RGD1564613	GR-alpha
RGD1564613	POU6F1(c2)
RGD1564613	Pbx1a
RGD1564613	SRY
RGD1564613	Sox5
RGD1565829	AP-1
RGD1566137	AhR
RGD1566137	ARP-1
RGD1566137	CUTL1
RGD1566137	LCR-F1
RGD1566137	GR
RGD1566137	GR-alpha
RGD1566137	GR-beta
RGD1566137	Pax-4a
RGD1566137	Brachyury
RGD1566137	NRSF form 1
Rnase1l1	S8
Rnase1l1	FOXO4
Rnase1l1	Lmo2
Rnase1l1	AREB6
Rnase1l1	ER-alpha
Rnase1l1	COMP1
RT1-T24-4	NF-kappaB
RT1-T24-4	NF-kappaB1
RT1-T24-4	RelA
RT1-T24-4	POU3F2
RT1-T24-4	c-Rel
RT1-T24-4	CBF-C
RT1-T24-4	CP1A
RT1-T24-4	CP1C
RT1-T24-4	NF-Y
RT1-T24-4	NF-YA
S100vp	p53
S100vp	AP-2alphaA
S100vp	AP-2alpha isoform 4
S100vp	AP-2alpha isoform 3
S100vp	AP-2alpha isoform 2
S100vp	AP-2alpha
S100vp	AP-1
S100vp	c-Jun
S100vp	NF-kappaB
S100vp	NF-kappaB1
Sec61gl	Gfi-1
Sec61gl	RFX1
Sec61gl	Cart-1
Sec61gl	IRF-1
Sec61gl	YY1
Sec61gl	RORalpha1
Sec61gl	SEF-1(1)
Sec61gl	Egr-4
Sec61gl	IRF-1
Sec61gl	Egr-2
Stfa2l1	CUTL1
Stfa2l1	Evi-1
Stfa2l1	aMEF-2
Stfa2l1	MEF-2A
Stfa2l1	TGIF
Stfa2l1	C/EBPalpha
Stfa2l1	S8
Stfa2l1	p53
Stfa2l1	Nkx2-5
Stfa2l1	Hlf
Zfp467	STAT3

## Sheet: Supplemental Information 4
Transcription Factor(TF)	The CID number of components which can interact with the TF	CID Number
Pax-6	2',3' O-(2,4,6-trinitrophenyl)adenosine 5'-diphosphate	15
Pax-6	4-methylimidazole	15
Pax-6	562-28-7	25
Pax-6	Aldosterone	158
Pax-6	cortivazol	158
Pax-6	Ethylene Glycol	158
Pax-6	Flavylium perchlorate	158
Pax-6	pyrimidinol carboxylic acid, 9	158
Pax-6	SureCN5411355	158
RelA	1,3-Benzenediol, 5-[2-(4-hydroxyphenyl)ethenyl]-	158
RelA	1,4,6-Heptatrien-3-one, 5-hydroxy-1,7-bis(4-hydroxy-3-methoxyphenyl)-	158
RelA	13-hydroxy-9,11-octadecadienoic acid	158
RelA	9-hydroxy-10,12-octadecadienoic acid	169
RelA	9-{5-o-[hydroxy(phosphonooxy)phosphoryl]pentofuranosyl}-9h-purin-6-amine	174
RelA	AC1L1C0O	174
RelA	ara-ATP	174
RelA	Aspirin	174
RelA	CTK8F0358	174
RelA	Dithiothreitol	174
RelA	Ethanol	176
RelA	Hydrogen Peroxide	176
RelA	pioglitazone	177
RelA	Uric Acid	177
Sp1	(S)-6-acetamido-2-(2-((S)-2-acetamido-4-methylpentanamido)acetamido)-N-(4-methyl-2-oxo-2H-chromen-7-yl)hexanamide	189
Sp1	.alpha.-Linolenic acid	189
Sp1	1,3-Benzenediol, 5-[2-(4-hydroxyphenyl)ethenyl]-	189
Sp1	1,4,6-Heptatrien-3-one, 5-hydroxy-1,7-bis(4-hydroxy-3-methoxyphenyl)-	190
Sp1	2-(4-morpholinyl)-8-phenyl-4H-1-benzopyran-4-one	197
Sp1	3-aminophthalimidoglutarimide	197
Sp1	5,8,11,14,17-Eicosapentaenoicacid, (5Z,8Z,11Z,14Z,17E)-	197
Sp1	5,8,11,14-Eicosatetraenoic acid	197
Sp1	8-iso PROSTAGLANDIN E2	197
Sp1	AC1L1DTZ	197
Sp1	AC1L1GN4	197
Sp1	Ammonium Chloride	197
Sp1	Arsenic	197
Sp1	Butyric Acid	197
Sp1	calcium ion	197
Sp1	Carbamimidoyl-acetic acid	197
Sp1	Caswell No. 059	197
Sp1	CCRIS 9140	197
Sp1	celecoxib	197
Sp1	CHEBI_45644	197
Sp1	Chlorodiphenyl (54% Chlorine)	197
Sp1	Hydrogen Peroxide	197
Sp1	KBio2_002303	206
Sp1	Linoleic Acid	206
Sp1	Manganese	206
Sp1	MolMap_000005	206
Sp1	N,N,N',N'-tetrakis(2-pyridylmethyl)ethylenediamine	206
Sp1	Nogalamycin	240
Sp1	NSC113090	241
Sp1	Palmitic Acid	252
Sp1	perifosine	264
Sp1	phenethyl isothiocyanate	264
Sp1	sulindac sulfide	264
Sp1	Sulindac	271
Sp1	Zinc	271
Sp1	ZINC13783418	271
AP-1	Glycerol	271
AP-1	5,7-dihydroxy-2-(3,4,5-trihydroxyphenyl)-3,4-dihydro-2H-chromen-3-yl 3,4,5-trihydroxybenzoate	271
AP-1	9-{5-o-[hydroxy(phosphonooxy)phosphoryl]pentofuranosyl}-9h-purin-6-amine	274
AP-1	Selenomethionine	274
AP-1	2-amino-9-{5-o-[hydroxy(phosphonooxy)phosphoryl]pentofuranosyl}-1,9-dihydro-6h-purin-6-one	274
AP-1	2-amino-9-[5-o-(hydroxy{[hydroxy(phosphonooxy)phosphoryl]oxy}phosphoryl)pentofuranosyl]-3,9-dihydro-6h-purin-6-one	274
AP-1	DIHYDROGENPHOSPHATE ION	274
XBP-1	362-07-2	274
XBP-1	6-[6-(butanoylamino)-9h-purin-9-yl]-2-hydroxy-2-oxidotetrahydro-4h-furo[3,2-d][1,3,2]dioxaphosphinin-7-yl butanoate	311
XBP-1	AC1L1JK3	311
XBP-1	arsenite	338
XBP-1	BAPTA-AM	338
XBP-1	Calcimycin	450
XBP-1	CGP 60474	450
XBP-1	CID 25465	450
XBP-1	CID 9921340	450
XBP-1	CID_8029	450
XBP-1	CTK8F0358	450
XBP-1	diacetoxyscirpenol	450
XBP-1	ferrous sulfate	450
XBP-1	gadolinium chloride	450
XBP-1	Galactitol	450
XBP-1	GNF-PF-1442	450
XBP-1	Hexopyranose	469
XBP-1	Homocysteine	473
XBP-1	Isocycloheximide	544
XBP-1	Mutant Kinases Inhibitor II	544
XBP-1	Palmitic Acid	544
XBP-1	phenylmethylpyrazolone	561
XBP-1	PS 341 (pharmaceutical)	562
XBP-1	SMM	581
XBP-1	Taurochenodeoxycholic Acid	593
XBP-1	Thapsigargin	597
c-Fos	17-methyl-7,8-didehydro-4,5-epoxymorphinan-3,6-diol	611
c-Fos	9-{5-o-[hydroxy(phosphonooxy)phosphoryl]pentofuranosyl}-9h-purin-6-amine	611
c-Fos	Ammonium Chloride	698
c-Fos	Amphetamine	702
c-Fos	ara-ATP	702
c-Fos	CCRIS 9140	702
c-Fos	Cocaine	702
c-Fos	DIHYDROGENPHOSPHATE ION	730
c-Fos	Etoposide	750
c-Fos	Glutamic Acid	753
c-Fos	Hexopyranose	753
c-Fos	Hydrogen Peroxide	753
c-Fos	Isoreserpin	753
c-Fos	ST013886	753
c-Fos	Vitinoin	753
c-Myc	1-(2-cyano-3,12-dioxooleana-1,9-dien-28-oyl) imidazole	753
c-Myc	2-(2-amino-3-methoxyphenyl)-4H-1-benzopyran-4-one	753
c-Myc	2-(4-morpholinyl)-8-phenyl-4H-1-benzopyran-4-one	753
c-Myc	87624-EP2270018A1	753
c-Myc	AC1L1KON	774
c-Myc	Butyric Acid	774
c-Myc	c-Myc Inhibitor	774
c-Myc	CCRIS 9140	778
c-Myc	Ethanamine, 2-[4-(1,2-diphenyl-1-butenyl)phenoxy]-N,N-dimethyl-	784
c-Myc	Heparitin	784
c-Myc	Isocycloheximide	784
c-Myc	NSC 627609	784
c-Myc	Okadaic Acid	861
c-Myc	porphine	865
c-Myc	ST013886	884
c-Myc	Teniposide	888
c-Myc	tetra(4-N-methylpyridyl)porphine	888
c-Myc	ZINC13783291	896
c-Myc	ZINC13783418	896
SRF	ara-ATP	923
SRF	Arginine	925
SRF	latrunculin B	925
POU3F2(N-Oct-5a)	Ethylene Glycol	925
CBF(2)	AC1L1M7Y	928
CBF(2)	buparvaquone	928
CBF(2)	mecarbam	929
CBF(2)	Selenomethionine	938
CBF-A	5,8,11,14,17-Eicosapentaenoicacid, (5Z,8Z,11Z,14Z,17E)-	938
CBF-A	5,8,11,14-Eicosatetraenoic acid	951
CBF-A	Linoleic Acid	985
CBF-A	Palmitic Acid	985
ATF-2	Cyclosporine	985
ATF-2	NCGC00167798-01	985
ATF-2	Simvastatin	985
ATF-2	Tetrachlorodibenzodioxin	985
ATF-2	Baclofen	985
ATF-2	PD 169316	985
ATF-2	Galactitol	985
ATF-2	15-hydroxy-5,8,11,13-eicosatetraenoic acid	985
ATF-2	anthra(1,9-cd)pyrazol-6(2H)-one	994
ATF-2	9-{5-o-[hydroxy(phosphonooxy)phosphoryl]pentofuranosyl}-9h-purin-6-amine	1003
ATF-2	ara-ATP	1003
COUP-TF2	CCRIS 9140	1003
COUP-TF2	ponasterone A	1016
COUP-TF2	Zinc	1023
COUP-TF2	Vitinoin	1080
COUP-TF2	Compound Summary for_ CID 4829	1117
COUP-TF2	13-hydroxy-9,11-octadecadienoic acid	1117
COUP-TF2	9-hydroxy-10,12-octadecadienoic acid	1153
COUP-TF2	CTK8F0358	1158
CBF-B	.alpha.-Linolenic acid	1175
CBF-B	5,8,11,14,17-Eicosapentaenoicacid, (5Z,8Z,11Z,14Z,17E)-	1287
CBF-B	5,8,11,14-Eicosatetraenoic acid	1287
CBF-B	Linoleic Acid	1401
CBF-B	ST013886	1424
E4BP4	Betamethasone	1424
GCNF	87624-EP2270018A1	1424
GCNF	DR0	1424
Gfi-1	HOE 33342	1424
Hlf	Carbocysteine	1424
Hlf	GR-GS	1444
IRF-1	2'(3')-O-(N-methyl)anthraniloylguanosine 5'-triphosphate	1464
IRF-1	8-iso PROSTAGLANDIN E2	1573
IRF-1	AC1L52UF	1639
IRF-1	AG-G-74320	1690
IRF-1	anthra(1,9-cd)pyrazol-6(2H)-one	1690
IRF-1	baicalein	1690
IRF-1	CCRIS 9140	1744
IRF-1	ciglitazone	1752
IRF-1	Etoposide	1912
IRF-1	fludarabine	1912
IRF-1	Fluticaps (TN)	1983
IRF-1	Methylnitrosourea	2182
IRF-1	Vitinoin	2199
IRF-1	ZINC13783291	2244
NF-YA	.alpha.-Linolenic acid	2244
NF-YA	5,8,11,14,17-Eicosapentaenoicacid, (5Z,8Z,11Z,14Z,17E)-	2250
NF-YA	5,8,11,14-Eicosatetraenoic acid	2250
NF-YA	Linoleic Acid	2284
NF-YA	Palmitic Acid	2284
NF-YA	ST013886	2293
NF-YB	.alpha.-Linolenic acid	2336
NF-YB	5,8,11,14,17-Eicosapentaenoicacid, (5Z,8Z,11Z,14Z,17E)-	2353
NF-YB	5,8,11,14-Eicosatetraenoic acid	2353
NF-YB	Linoleic Acid	2353
NF-YB	Palmitic Acid	2353
Nkx3-1	(4-14c)pregn-4-ene-3,20-dione	2371
Nkx3-1	1,4,6-Heptatrien-3-one, 5-hydroxy-1,7-bis(4-hydroxy-3-methoxyphenyl)-	2390
Nkx3-1	87624-EP2270018A1	2390
Nkx3-1	Alanine	2390
Nkx3-1	CCRIS 9140	2390
Nkx3-1	Cimetidine	2390
Nkx3-1	nimesulide	2390
Nkx3-1	ST013886	2460
Nkx3-1	STK366316	2460
Nkx3-1	Vitinoin	2483
CRE-BP1	Cyclosporine	2483
CRE-BP1	NCGC00167798-01	2499
CRE-BP1	Simvastatin	2499
CRE-BP1	Tetrachlorodibenzodioxin	2506
CRE-BP1	Baclofen	2506
CRE-BP1	phenethyl isothiocyanate	2514
CRE-BP1	PD 169316	2514
CRE-BP1	Galactitol	2514
CRE-BP1	15-hydroxy-5,8,11,13-eicosatetraenoic acid	2524
CRE-BP1	anthra(1,9-cd)pyrazol-6(2H)-one	2538
CRE-BP1	9-{5-o-[hydroxy(phosphonooxy)phosphoryl]pentofuranosyl}-9h-purin-6-amine	2538
CRE-BP1	ara-ATP	2538
c-Ets-1	1,4,6-Heptatrien-3-one, 5-hydroxy-1,7-bis(4-hydroxy-3-methoxyphenyl)-	2548
c-Ets-1	11,17,21-Trihydroxypregn-4-ene-3,20-dione	2548
c-Ets-1	8-iso PROSTAGLANDIN E2	2548
c-Ets-1	AC1L1TNA	2662
c-Ets-1	Histamine	2662
c-Ets-1	O-Phospho-DL-threonine	2662
c-Ets-1	Phosphoserine	2662
c-Ets-1	Vitinoin	2668
c-Jun	2-(4-morpholinyl)-8-phenyl-4H-1-benzopyran-4-one	2750
c-Jun	9-{5-o-[hydroxy(phosphonooxy)phosphoryl]pentofuranosyl}-9h-purin-6-amine	2756
c-Jun	Amphetamine	2756
c-Jun	anthra(1,9-cd)pyrazol-6(2H)-one	2796
c-Jun	ara-ATP	2797
c-Jun	dl-Phenylephrine	2800
c-Jun	Paraquat	2802
Brachyury	5,6,7,8-tetrahydrofolic acid	2854
Brachyury	COZYMASE	2885
Brachyury	dihydronicotinamide formycin dinucleotide	2900
Brachyury	Glycine	2900
Brachyury	SureCN177917	2900
Brachyury	SureCN50782	2900
Egr-1	1,4,6-Heptatrien-3-one, 5-hydroxy-1,7-bis(4-hydroxy-3-methoxyphenyl)-	2900
Egr-1	2-(2-amino-3-methoxyphenyl)-4H-1-benzopyran-4-one	2900
Egr-1	8-iso PROSTAGLANDIN E2	2900
Egr-1	AC1L1FUG	2951
Egr-1	Angiotensin II	2973
Egr-1	ara-ATP	2973
Egr-1	CCRIS 9140	2973
Egr-1	CID_2524	3007
Egr-1	Cocaine	3007
Egr-1	CTK8F0358	3007
Egr-1	Cytosine	3007
Egr-1	Haloperidol	3009
Egr-1	Heparitin	3054
Egr-1	Histamine	3054
Egr-1	Isocycloheximide	3054
Egr-1	LS-923	3054
Egr-1	Melatonin	3054
Egr-1	sodium 2-hydroxy-3-(octadec-9-enoyloxy)propyl hydrogen phosphate	3054
Egr-1	ST013886	3054
Egr-1	sulindac sulfide	3054
Egr-1	Sulindac	3054
Egr-1	tolfenamic acid	3054
FOXO1	(4-14c)pregn-4-ene-3,20-dione	3054
FOXO1	1,3-Benzenediol, 5-[2-(4-hydroxyphenyl)ethenyl]-	3054
FOXO1	17-Hydroxyandrost-4-en-3-one	3054
FOXO1	2-(4-morpholinyl)-8-phenyl-4H-1-benzopyran-4-one	3054
FOXO1	8-iso PROSTAGLANDIN E2	3054
FOXO1	9-{5-o-[hydroxy(phosphonooxy)phosphoryl]pentofuranosyl}-9h-purin-6-amine	3054
FOXO1	ACMC-20mvek	3209
FOXO1	Acrolein	3209
FOXO1	ara-ATP	3209
FOXO1	Berberine	3209
FOXO1	Betamethasone	3209
FOXO1	CCRIS 9140	3209
FOXO1	CTK8F0358	3209
FOXO1	dl-Phenylephrine	3209
FOXO1	Fenofibrate	3220
FOXO1	Luronit	3220
FOXO1	Niacin	3223
FOXO1	NSC94017	3262
FOXO1	Paclitaxel	3262
FOXO1	Palmitic Acid	3339
FOXO1	Simvastatin	3339
FOXO1a	(4-14c)pregn-4-ene-3,20-dione	3339
FOXO1a	1,3-Benzenediol, 5-[2-(4-hydroxyphenyl)ethenyl]-	3385
FOXO1a	17-Hydroxyandrost-4-en-3-one	3386
FOXO1a	2-(4-morpholinyl)-8-phenyl-4H-1-benzopyran-4-one	3397
FOXO1a	8-iso PROSTAGLANDIN E2	3399
FOXO1a	9-{5-o-[hydroxy(phosphonooxy)phosphoryl]pentofuranosyl}-9h-purin-6-amine	3403
FOXO1a	ACMC-20mvek	3413
FOXO1a	Acrolein	3448
FOXO1a	ara-ATP	3454
FOXO1a	Berberine	3559
FOXO1a	Betamethasone	3559
FOXO1a	CTK8F0358	3559
FOXO1a	dl-Phenylephrine	3715
FOXO1a	Fenofibrate	3715
FOXO1a	Luronit	3776
FOXO1a	Niacin	3779
FOXO1a	NSC94017	3779
FOXO1a	Paclitaxel	3827
FOXO1a	Palmitic Acid	3877
FOXO1a	Simvastatin	3973
FOXO1a	zerumbone	3973
FOXO4	2-(4-morpholinyl)-8-phenyl-4H-1-benzopyran-4-one	3973
Nkx2-2	Palm-C10PC	3973
Olf-1	13-hydroxy-9,11-octadecadienoic acid	3973
Olf-1	9-hydroxy-10,12-octadecadienoic acid	3973
Olf-1	Citric Acid	3973
Olf-1	CTK8F0358	3973
Olf-1	decitabine	3973
Olf-1	Ethylene Glycol	3973
Olf-1	pioglitazone	3987
Olf-1	Procainamide	4021
Olf-1	Selenomethionine	4055
STAT5B	(4-14c)pregn-4-ene-3,20-dione	4091
STAT5B	(E)-4-Hydroxytamoxifen	4091
STAT5B	1,6-hexamethylene diisocyanate	4115
STAT5B	15-hydroxy-5,8,11,13-eicosatetraenoic acid	4115
STAT5B	2-(4-morpholinyl)-8-phenyl-4H-1-benzopyran-4-one	4115
STAT5B	2-(acetyloxy)-3-(hexadecyloxy)propyl 2-(trimethylammonio)ethyl phosphate	4115
STAT5B	2-{[6-(benzylamino)-9-isopropyl-9h-purin-2-yl]amino}butan-1-ol	4234
STAT5B	9-{5-o-[hydroxy(phosphonooxy)phosphoryl]pentofuranosyl}-9h-purin-6-amine	4246
STAT5B	AC1L1ASU	4253
STAT5B	Angiotensin II	4253
STAT5B	ara-ATP	4261
STAT5B	AZD 1480	4425
STAT5B	benzaldehyde	4425
STAT5B	Betamethasone	4477
STAT5B	CCRIS 9140	4495
STAT5B	celecoxib	4536
STAT5B	dasatinib	4553
STAT5B	imatinib	4594
STAT5B	KW 2449	4605
STAT5B	L-Cysteine, N-acetyl-	4609
STAT5B	N-(2-(Diethylamino)ethyl)-5-((5-fluoro-2-oxoindolin-3-ylidene)methyl)-2,4-dimethyl-1H-pyrrole-3-carboxamide	4609
STAT5B	N-benzyl-2-cyano-3-(3,4-dihydroxyphenyl)prop-2-enamide	4624
STAT5B	O-acetylserine	4712
STAT5B	PD 180970	4712
STAT5B	Phosphotyrosine	4713
STAT5B	Pimozide	4713
STAT5B	spaslar	4713
STAT5B	ST013886	4713
STAT5B	SureCN14041409	4713
STAT5B	SureCN14041526	4713
STAT5B	SureCN14041535	4740
STAT5B	SureCN2313095	4782
STAT5B	ZINC13783291	4782
Zic1	CHEMBL1614773	4782
Zic1	CTK8F0944	4782
ARP-1	13-hydroxy-9,11-octadecadienoic acid	4782
ARP-1	9-hydroxy-10,12-octadecadienoic acid	4829
ARP-1	CCRIS 9140	4829
ARP-1	CTK8F0358	4829
ARP-1	pioglitazone	4829
ARP-1	ponasterone A	4829
ARP-1	Vitinoin	4829
En-1	1-Penten-3-one, 1,2-dihydroxy-5-(methylthio)-	4893
En-1	1-phospho-2,3-diketo-5-S-methylthiopentane	4912
En-1	1-phospho-5-S-methylthioribulose	4913
En-1	2-keto-4-methylthiobutyric acid	4972
En-1	2-OXOHEPTYLPHOSPHONIC ACID	5035
En-1	Glycerol	5040
En-1	Heptaethylene glycol monoethyl ether	5052
En-1	Selenomethionine	5056
CUTL1	ara-ATP	5056
CUTL1	9-{5-o-[hydroxy(phosphonooxy)phosphoryl]pentofuranosyl}-9h-purin-6-amine	5056
CUTL1	CDP-abequose	5056
CUTL1	PD 173074	5056
CUTL1	PKC412	5056
CUTL1	SureCN177917	5056
GATA-3	Fluticasone propiponate	5070
GATA-3	Indican	5076
GATA-3	pirfenidone	5097
GATA-3	Vitinoin	5097
STAT-4	1,4,6-Heptatrien-3-one, 5-hydroxy-1,7-bis(4-hydroxy-3-methoxyphenyl)-	5103
STAT-4	2'(3')-O-(N-methyl)anthraniloylguanosine 5'-triphosphate	5291
STAT-4	2-(2-amino-3-methoxyphenyl)-4H-1-benzopyran-4-one	5291
STAT-4	2-(4-methoxyphenyl)-5-nitro-1H-benzimidazole	5307
STAT-4	5,12-Di-HETE	5307
STAT-4	5-cis Iloprost	5307
STAT-4	7-ketocholesterol	5311
STAT-4	9-{5-o-[hydroxy(phosphonooxy)phosphoryl]pentofuranosyl}-9h-purin-6-amine	5376
STAT-4	AC1L1ASU	5408
STAT-4	AC1L1DTZ	5408
STAT-4	AC1L1JM9	5408
STAT-4	ara-ATP	5408
STAT-4	beta-Hydroxypropiovanillone	5519
STAT-4	CCRIS 9140	5538
STAT-4	CID_5040	5538
STAT-4	CTK8F0358	5538
STAT-4	daidzein	5538
STAT-4	decitabine	5538
STAT-4	diallyl disulfide	5538
STAT-4	fazarabine	5538
STAT-4	Genistein	5538
STAT-4	GGTI 298	5538
STAT-4	Histamine	5538
STAT-4	imiquimod	5538
STAT-4	JLK 1486	5538
STAT-4	kaempferol	5538
STAT-4	lapatinib	5538
STAT-4	N-benzyl-2-cyano-3-(3,4-dihydroxyphenyl)prop-2-enamide	5538
STAT-4	N-{(1s,2r)-1-Benzyl-3-[(Cyclopropylmethyl)(2-Furylsulfonyl)amino]-2-Hydroxypropyl}-N'-Methylsuccinamide	5589
STAT-4	O-acetylserine	5590
STAT-4	Ovasterol-beta	5591
STAT-4	parthenolide	5694
STAT-4	Phosphotyrosine	5753
STAT-4	Prazosin	5756
STAT-4	protoporphyrin ix containing co	5831
STAT-4	Pyridone 6	5839
STAT-4	SB 203580	5881
STAT-4	Spectrum_000303	5897
STAT-4	ST077708	5950
STAT-4	tempol	5950
STAT-4	tofacitinib	5978
STAT-4	Vidarabine Phosphate	5991
STAT-4	Vidarabine	5991
STAT-4	Vitinoin	6001
STAT2	1,6-hexamethylene diisocyanate	6166
STAT2	2-(2-amino-3-methoxyphenyl)-4H-1-benzopyran-4-one	6166
STAT2	8-iso PROSTAGLANDIN E2	6166
STAT2	9-{5-o-[hydroxy(phosphonooxy)phosphoryl]pentofuranosyl}-9h-purin-6-amine	6166
STAT2	AGN-PC-04S32A	6166
STAT2	AGN-PC-04TNCP	6166
STAT2	anatabine	6166
STAT2	ara-ATP	6166
STAT2	AZD 1480	6166
STAT2	CHEMBL1774954	6261
STAT2	CHEMBL1774955	6322
STAT2	CHEMBL1774956	6503
STAT2	CHEMBL1774957	6503
STAT2	CHEMBL1774958	6623
STAT2	CHEMBL1774959	7847
STAT2	CHEMBL1774961	7847
STAT2	CHEMBL1774962	7847
STAT2	CHEMBL1774963	7852
STAT2	CHEMBL1774964	7870
STAT2	CHEMBL1774965	8029
STAT2	CHEMBL1774966	8404
STAT2	CHEMBL1774967	8445
STAT2	CHEMBL1774969	8515
STAT2	CHEMBL231705	8515
STAT2	CHEMBL267246	8515
STAT2	CHEMBL470227	8515
STAT2	CHEMBL503365	9711
STAT2	CHEMBL573443	9782
STAT2	CHEMBL574636	9782
STAT2	CHEMBL575497	9782
STAT2	CHEMBL578635	9782
STAT2	CHEMBL583727	9782
STAT2	CHEMBL583728	9782
STAT2	cucurbitacin I	9782
STAT2	eupatilin	10205
STAT2	MolMap_000005	10258
STAT2	N-benzyl-2-cyano-3-(3,4-dihydroxyphenyl)prop-2-enamide	10422
STAT2	Niclosamide	10560
STAT2	NSC 74859	10585
STAT2	PD 180970	10836
STAT2	Phorbol 12,13-Dibutyrate	11222
STAT2	Phosphotyrosine	11388
STAT2	pregna-4,17-diene-3,16-dione	11850
STAT2	PS 341 (pharmaceutical)	11850
STAT2	SB 203580	11850
STAT2	silybin	11979
STAT2	STAT3 Inhibitor VII	12699
STAT2	SureCN177917	12699
STAT3	1,3-Benzenediol, 5-[2-(4-hydroxyphenyl)ethenyl]-	13195
STAT3	14,15-epoxy-5,8,11-eicosatrienoic acid	15103
STAT3	15-hydroxy-5,8,11,13-eicosatetraenoic acid	15103
STAT3	2-(2-amino-3-methoxyphenyl)-4H-1-benzopyran-4-one	15103
STAT3	2-(acetyloxy)-3-(hexadecyloxy)propyl 2-(trimethylammonio)ethyl phosphate	15103
STAT3	2-{[6-(benzylamino)-9-isopropyl-9h-purin-2-yl]amino}butan-1-ol	15103
STAT3	4-((3-bromophenyl)amino)-6,7-dimethoxyquinazoline	15103
STAT3	4-HT	15103
STAT3	5,7-dihydroxy-2-(3,4,5-trihydroxyphenyl)-3,4-dihydro-2H-chromen-3-yl 3,4,5-trihydroxybenzoate	15103
STAT3	9-{5-o-[hydroxy(phosphonooxy)phosphoryl]pentofuranosyl}-9h-purin-6-amine	15103
STAT3	AC1L1EOW	15103
STAT3	ACMC-20lrps	15531
STAT3	Angiotensin II	15625
STAT3	ara-ATP	15625
STAT3	AZD 1480	15625
STAT3	CCRIS 9140	15625
STAT3	Dehydroepiandrosterone	16043
STAT3	Emodin	16362
STAT3	Endotoxin	16590
STAT3	entinostat	16741
STAT3	methyl 2-cyano-3,12-dioxoolean-1,9-dien-28-oate	16741
STAT3	N-(2-(Diethylamino)ethyl)-5-((5-fluoro-2-oxoindolin-3-ylidene)methyl)-2,4-dimethyl-1H-pyrrole-3-carboxamide	16834
STAT3	N-benzyl-2-cyano-3-(3,4-dihydroxyphenyl)prop-2-enamide	17434
STAT3	Nicotine	18296
STAT3	NVP-TAE684	19001
STAT3	Octoxynol	19001
STAT3	Oleic Acid	21704
STAT3	Phosphotyrosine	21704
STAT3	plumbagin	22469
STAT3	prolinedithiocarbamate	23830
STAT3	Pyranyl benzyladenine	23930
STAT3	pyrrolidine dithiocarbamic acid	23957
STAT3	Sirolimus	23994
STAT3	sorafenib	23994
STAT3	Spectrum_000303	23994
STAT3	stattic	23994
STAT6	(E)-4-Hydroxytamoxifen	23994
STAT6	AGN-PC-072LSM	23994
STAT6	Angiotensin II	24247
STAT6	AS-1517499	24393
STAT6	Calcimycin	24759
STAT6	Omeprazole	24759
STAT6	spaslar	24958
STAT6	SureCN2386576	25465
STAT6	SureCN763213	25465
STAT6	vorinostat	25517
CBF-C	.alpha.-Linolenic acid	25517
CBF-C	5,8,11,14,17-Eicosapentaenoicacid, (5Z,8Z,11Z,14Z,17E)-	26280
CBF-C	5,8,11,14-Eicosatetraenoic acid	26280
CBF-C	KBio2_002303	26280
CBF-C	Linoleic Acid	28683
CBF-C	Palmitic Acid	29051
Egr-2	(4-14c)pregn-4-ene-3,20-dione	31553
Egr-2	13-hydroxy-9,11-octadecadienoic acid	34768
Egr-2	9-hydroxy-10,12-octadecadienoic acid	36187
Egr-2	CTK8F0358	36314
Egr-2	Methoxychlor	36314
Egr-2	pioglitazone	36462
Egr-3	(4-14c)pregn-4-ene-3,20-dione	36462
Egr-3	CCRIS 9140	36462
Egr-3	gaboxadol	37783
Egr-3	Haloperidol	37839
Egr-3	ST013886	37839
E2F	9-{5-o-[hydroxy(phosphonooxy)phosphoryl]pentofuranosyl}-9h-purin-6-amine	39042
E2F	ara-ATP	39214
E2F	CID 10041614	39929
E2F	Diaminopimelic Acid	40470
NF-1	Acetaldehyde	40486
NF-1	diphosphoric acid	40486
NF-1	Glycerol	40486
NF-1	GPEtn(34_0)	40486
NF-1	phosphatidylethanolamine	40632
NF-1	polyethylene glycol alkylphenyl ether	47751
NF-1	Tromethamine	47751
NF-L	AGN-PC-00IQUF	54313
NF-L	diphenylditelluride	54313
NF-L	Laminarin	54454
Sox9	6-[6-(butanoylamino)-9h-purin-9-yl]-2-hydroxy-2-oxidotetrahydro-4h-furo[3,2-d][1,3,2]dioxaphosphinin-7-yl butanoate	54454
Sox9	87624-EP2270018A1	54454
Sox9	Betamethasone	54454
Sox9	CP 31398	54454
Sox9	Cytochalasin D	57056
Sox9	Heparitin	57469
Sox9	Isocycloheximide	60062
Sox9	NSC94017	61486
Sox9	oxalylglycine	61672
Sox9	Vitinoin	62924
CP2	Fluorouracil	63090
CP2	psychosine-3'-sulfate ester	65128
CP2	SB 203580	65128
E2F-1	2-morpholin-4-yl-6-thianthren-1-yl-pyran-4-one	65128
E2F-1	9-{5-o-[hydroxy(phosphonooxy)phosphoryl]pentofuranosyl}-9h-purin-6-amine	65128
E2F-1	ara-ATP	65128
E2F-1	Butyric Acid	65128
E2F-1	CCRIS 9140	65128
E2F-1	CD 437	65128
E2F-1	NSC302991	65128
E2F-1	sorafenib	65128
CREB	17-methyl-7,8-didehydro-4,5-epoxymorphinan-3,6-diol	65128
CREB	6,10,10b-trihydroxy-3,4a,7,7,10a-pentamethyl-1-oxo-3-vinyldodecahydro-1h-benzo[f]chromen-5-yl acetate	65128
CREB	9-{5-o-[hydroxy(phosphonooxy)phosphoryl]pentofuranosyl}-9h-purin-6-amine	65128
CREB	ara-ATP	65128
CREB	Cocaine	65128
CREB	Deferoxamine	65128
CREB	Fluoxetine	65128
CREB	Isoproterenol	65128
CREB	NSC94017	65128
CREB	ST013886	65128
CREB	Taurochenodeoxycholic Acid	65128
ATF6	4-(2-aminoethyl)benzenesulfonylfluoride	65128
ATF6	AC1L1FUW	65253
ATF6	CID 25465	65351
ATF6	decitabine	66249
ATF6	Metformin	66868
ATF6	Salicylic Acid	67050
ATF6	Thapsigargin	68841
E2F-5	9-{5-o-[hydroxy(phosphonooxy)phosphoryl]pentofuranosyl}-9h-purin-6-amine	71398
E2F-5	ara-ATP	71724
E2F-5	NSC46046	71768
GATA-2	Berberine	75142
GATA-2	Vitinoin	75142
N-Myc	AC1L1C0O	77998
N-Myc	alvocidib	77998
N-Myc	bromoxynil	77998
N-Myc	c-Myc Inhibitor	77998
N-Myc	CCT137690	77998
N-Myc	Deferoxamine	77998
N-Myc	Vitinoin	77998
N-Myc	ZINC13783291	77998
FOXI1	Perchloric Acid	77998
FOXI1	ZINC13783291	77998
Zic3	CHEMBL1614773	77998
Zic3	CID 107842	77998
Zic3	CTK8F0944	77998
Zic3	perhydrohistrionicotoxin	80283
MAF-1	Sirolimus	81124
MAF-1	Vitinoin	84098
c-Rel	219773-55-4	89594
c-Rel	6-(6-amino-8-bromo-9H-purin-9-yl)-7-hydroxytetrahydro-4H-furo[3,2-d][1,3,2]dioxaphosphinin-2-olate 2-oxide	89594
c-Rel	AC1L3GIE	89594
c-Rel	AC1L52UF	91443
c-Rel	AGN-PC-046IVP	91474
c-Rel	CHEMBL1801950	92832
c-Rel	CHEMBL218434	95715
c-Rel	CHEMBL384590	96943
c-Rel	CID 16109597	100657
c-Rel	Cocaine	104741
c-Rel	Dithiothreitol	104788
c-Rel	Ketotifen	104946
c-Rel	Pentoxifylline	105009
c-Rel	SB 203580	107842
c-Rel	scalaradial	107881
c-Rel	Tacrolimus	112829
FOXO3	(E)-4-Hydroxytamoxifen	115092
FOXO3	17-Hydroxyandrost-4-en-3-one	115127
FOXO3	2-(4-morpholinyl)-8-phenyl-4H-1-benzopyran-4-one	115127
FOXO3	20-Norcrotalanan-11,15-dione, 14,19-dihydro-12,13-dihydroxy-, (13.alpha.,14.alpha.)-	115205
FOXO3	AC1LF3IX	122724
FOXO3	calcium ion	123583
FOXO3	CHEMBL262615	123631
FOXO3	Corticosterone	124777
FOXO3	decitabine	127601
FOXO3	dl-Arterenol	128647
FOXO3	fazarabine	128647
FOXO3	Flutamide	129803
FOXO3	Genistein	130402
FOXO3	Hydrogen Peroxide	130779
FOXO3	magnesium ion	134385
FOXO3	Methoxychlor	134664
FOXO3	Simvastatin	134780
NF-YC	.alpha.-Linolenic acid	135411
NF-YC	5,8,11,14,17-Eicosapentaenoicacid, (5Z,8Z,11Z,14Z,17E)-	137994
NF-YC	5,8,11,14-Eicosatetraenoic acid	138194
NF-YC	Linoleic Acid	145857
NF-YC	Palmitic Acid	146898
POU6F1	N-[(5s)-5-Amino-5-Carboxypentanoyl]-L-Homocysteyl-S-Methyl-D-Cysteine	148177
POU6F1	Selenomethionine	165628
GATA-6	4-O-carboxymethylascochlorin	166617
GATA-6	6-(6-amino-8-bromo-9H-purin-9-yl)-7-hydroxytetrahydro-4H-furo[3,2-d][1,3,2]dioxaphosphinin-2-olate 2-oxide	168944
GATA-6	AC1L1ACE	168944
GATA-6	COZYMASE	172198
GATA-6	Glycerol	172198
GATA-6	leptomycin B	172198
GATA-6	N-(2-cyclohexyloxy-4-nitrophenyl)methanesulfonamide	172198
GATA-6	Vitinoin	172198
GATA-1	(4-14c)pregn-4-ene-3,20-dione	172198
GATA-1	66575-29-9	174549
GATA-1	anagrelide	176155
GATA-1	NSC94017	176155
GATA-1	Zinc	176155
HNF-1	2-AMINO-4-OXO-4-ALPHA-HYDROXY-	176155
HNF-1	2-amino-4-oxo-6-(1',2',3'-trihydroxypropyl)-diquinoid-7,8-dihydroxypterin	186136
HNF-1	2-AMINO-4-OXO-6-123-TRIHYDROXYPROP	187290
HNF-1	4a-carbinolamine tetrahydrobiopterin	192199
HNF-1	4a-hydroxytetrahydrobiopterin	192199
HNF-1	5,6,7,8-tetrahydrobiopterin	192621
HNF-1	7,8-dihydrobiopterin	208908
HNF-1	COZYMASE	216239
HNF-1	dihydronicotinamide formycin dinucleotide	216239
HNF-1	DL-Tyrosine	216345
HNF-1	Ethylene Glycol	222528
HNF-1	Glycerol	233874
HNF-1	Hydrogen	252682
HNF-1	hydroxide ion	360196
HNF-1	Iron	378227
HNF-1	Oxygen	387316
HNF-1	Phenylalanine	387316
HNF-1	Selenomethionine	387447
HNF-1	sepiapterin	387447
HNF-1	sulfate	387447
HNF-1A	17-Ethynyl estradiol	397496
HNF-1A	C-2 Ceramide	400769
HSF1	2-(4-morpholinyl)-8-phenyl-4H-1-benzopyran-4-one	422111
HSF1	2-Anilino-1,4-naphthoquinone	439306
HSF1	5,8,11,14-Eicosatetraenoic acid	440911
HSF1	AC1LEOSJ	441203
HSF1	AC1LSJHE	441207
HSF1	Acetic Acid	443495
HSF1	Alanine	444008
HSF1	Amebicide	445154
HSF1	arsenite	445639
HSF1	azetidine	445639
HSF1	BAS 03192405	445639
HSF1	Betamethasone	445643
HSF1	CHEMBL1352521	446208
HSF1	CHEMBL550251	446220
HSF1	F0700-0018	446220
HSF1	Glycerol	446220
HSF1	GNF-Pf-4325	446220
HSF1	GNF-Pf-78	446220
HSF1	GSK-3beta Inhibitor II	446378
HSF1	Hydrogen Peroxide	446378
HSF1	Indomethacin	446378
HSF1	isovelleral	446512
HSF1	Masoprocol	446872
HSF1	MLS000737657	446896
HSF1	MLS003373964	447693
HSF1	Riluzole	448032
HSF1	Salicylic Acid	449219
HSF1	Selenomethionine	451668
HSF1	STK337247	451668
HSF1	tripterine	451668
HSF1	ZINC00869238	451668
HSF2	Acetic Acid	452548
HSF2	Glycerol	454541
HSF2	Hemin	455658
HSF2	lactacystin	455658
HSF2	Selenomethionine	457193
ITF-2	8-iso PROSTAGLANDIN E2	468139
ITF-2	MTBD	468139
ITF-2	Vitamin K 3	468139
RFX1	isoxaflutole	468139
RFX1	t-butyl acetylene	468139
RFX1	pyridazinone derivative, 8e	468139
RFX1	Asp-AFC	468139
RFX1	Asp-AFC	566822
RFX1	DIHYDROGENPHOSPHATE ION	610479
RFX1	Technetium	626522
RFX1	apixaban	644215
RFX1	POTASSIUM SULFITE	644215
RFX1	Hexopyranose	644359
RFX1	MLS002702124	657237
RFX1	BRN 0309578	689799
RFX1	N-Hexylphosphonate Ethyl Ester	701067
RFX1	Clinafloxacin hydrochloride	722419
RFX1	ammonium osmium(4+) chloride(2_1_6)	771615
RFX1	AC1L1E6Z	895866
RFX1	ETHYL BENZENESULFONATE	1129395
RFX1	BRN 1243408	1249835
RFX1	AC1L9MVF	1271002
RFX1	7-hydroxy-4-trifluoromethylcoumarin	1271002
RFX1	morpholino	1466108
RFX1	penicillin N	1548887
RFX1	4,4'-dibenzamido-2,2'-stilbenedisulfonic acid	1548887
RFX1	7-ethoxy-4-trifluoromethylcoumarin	2056784
Nkx6-1	AC1L2XI2	2142309
Nkx6-1	ethylenimine quinone	2779853
Nkx6-1	Hexopyranose	3003565
POU2F1	1-[5-o-(hydroxy{[hydroxy(phosphonooxy)phosphoryl]oxy}phosphoryl)pentofuranosyl]-2,4(1h,3h)-pyrimidinedione	3062316
POU2F1	2-amino-9-[5-o-(hydroxy{[hydroxy(phosphonooxy)phosphoryl]oxy}phosphoryl)pentofuranosyl]-3,9-dihydro-6h-purin-6-one	3062316
POU2F1	4-amino-1-[5-o-(hydroxy{[hydroxy(phosphonooxy)phosphoryl]oxy}phosphoryl)pentofuranosyl]-2(1h)-pyrimidinone	3068143
POU2F1	ara-ATP	3080614
POU2F1	Ethanol	3086686
Cdc5	3tv4	3086686
Cdc5	Adenine	3146476
Cdc5	2-di-n-propylamino-5,8-dimethoxytetralin	3192405
Cdc5	3,3-Dimethyldiaziridine	3277600
Cdc5	5,8-dimethoxy-1,2,3,4-tetrahydronaphthalene	3294423
Cdc5	Diaziridine, 1,2-bis(1-methylethyl)-	3380837
Cdc5	8-Hydroxy-2-(di-n-propylamino)tetralin	3392731
Cdc5	FH 510	3561768
Cdc5	DK 118	4080866
Cdc5	BN 82685	4369424
Cdc5	2-Butanethiol	4534086
Cdc5	CHEMBL1230285	5050863
Cdc5	2-di-n-propylaminoindan	5154691
Cdc5	Propylamine	5273755
Cdc5	tetralin	5278396
Cdc5	2-Methylbut-2-yl radical	5280343
Cdc5	CHEMBL1614776	5280443
Cdc5	N,O-bis(trimethylsilyl)acetamide	5280450
Cdc5	CHEMBL1242745	5280450
Cdc5	rhodizonic acid	5280450
Cdc5	SureCN833885	5280450
Cdc5	ZINC13783418	5280450
POU3F2	Ethylene Glycol	5280450
STAT5A	(4-14c)pregn-4-ene-3,20-dione	5280450
STAT5A	2-(4-morpholinyl)-8-phenyl-4H-1-benzopyran-4-one	5280450
STAT5A	AC1L1ASU	5280863
STAT5A	Angiotensin II	5280934
STAT5A	AZD 1480	5280934
STAT5A	Betamethasone	5280934
STAT5A	CCRIS 9140	5280934
STAT5A	celecoxib	5280934
STAT5A	dasatinib	5280934
STAT5A	imatinib	5280934
STAT5A	N-benzyl-2-cyano-3-(3,4-dihydroxyphenyl)prop-2-enamide	5280961
STAT5A	O-acetylserine	5280961
STAT5A	Phosphotyrosine	5280961
STAT5A	SureCN14041409	5280961
STAT5A	SureCN14041526	5280961
STAT5A	SureCN14041535	5281321
STAT5A	trioxido(oxo)vanadium	5281605
Sox5	Oxygen	5281707
YY1	CID 9921340	5281708
YY1	CID 9944650	5282945
YY1	Probucol	5282945
YY1	Zinc	5282945
p53	1,3-Benzenediol, 5-[2-(4-hydroxyphenyl)ethenyl]-	5282945
p53	1-(9-ethyl-9H-carbazol-3-yl)-N-methylmethanamine	5282945
p53	2-Acetylaminofluorene	5282945
p53	2-Propanol	5283454
p53	5,6-Dimethoxy-2-methyl-benzothiazole	5284643
p53	6,7-dihydro[1,4]dioxino[2,3-f][1,3]benzothiazol-2-amine	5287620
p53	9-{5-o-[hydroxy(phosphonooxy)phosphoryl]pentofuranosyl}-9h-purin-6-amine	5287620
p53	AC1L1C0O	5287969
p53	Acetaminophen	5287969
p53	Acetoxyacetylaminofluorene	5289019
p53	alvocidib	5289120
p53	Angiotensin II	5311104
p53	ara-ATP	5311104
p53	Aspirin	5326793
p53	Berberine	5351279
p53	beta-Hydroxypropiovanillone	5352135
p53	CID_6503	5352135
p53	Citric Acid	5352135
p53	cresidine	5352135
p53	CTK8F0358	5352624
p53	Deoxycholic Acid	5352624
p53	Eflornithine	5353279
p53	Etoposide	5353283
p53	Genistein	5353283
p53	isoursodeoxycholic acid	5353283
p53	lactacystin	5353283
p53	Melatonin	5353283
p53	Metformin	5353726
p53	N-epsilon-acetyllysine	5353726
p53	Nicotine	5353726
p53	NSC302991	5353726
p53	nutlin 3	5353726
p53	pifithrin	5353726
p53	Quercetin	5353726
p53	Selenomethionine	5353726
p53	ST013886	5353726
p53	troglitazone	5359596
p53	Vincristine	5375667
p53	Vitinoin	5458428
p53	Zinc	5470187
p53	ZINC13783291	5476374
PPAR-alpha	.alpha.-Linolenic acid	5494425
PPAR-alpha	13-hydroxy-9,11-octadecadienoic acid	5497136
PPAR-alpha	5,8,11,14,17-Eicosapentaenoicacid, (5Z,8Z,11Z,14Z,17E)-	5702265
PPAR-alpha	5,8,11,14-Eicosatetraenoic acid	5702265
PPAR-alpha	5-cis Iloprost	5702265
PPAR-alpha	9-hydroxy-10,12-octadecadienoic acid	5716983
PPAR-alpha	Bezafibrate	6323351
PPAR-alpha	CID_77998	6376279
PPAR-alpha	Clofibrate	6426879
PPAR-alpha	Clofibric Acid	6435893
PPAR-alpha	Ethanol	6435893
PPAR-alpha	Fenofibrate	6436219
PPAR-alpha	GW 501516	6438999
PPAR-alpha	GW 7647	6455731
PPAR-alpha	Indomethacin	6455731
PPAR-alpha	Linoleic Acid	6473881
PPAR-alpha	N-oleoylethanolamine	6473881
PPAR-alpha	Oleic Acid	6539732
PPAR-alpha	Palmitic Acid	6610292
PPAR-alpha	pioglitazone	6610292
PPAR-alpha	pirinixic acid	6712941
AP-4\	Brefeldin A	6913588
AP-4\	Glycerol	6917907
AhR	2,3,7,8-tetrachlorodibenzofuran	9799061
AhR	2-(3,4-dimethoxyphenyl)-5-fluorobenzothiazole	9801356
AhR	3,4,3',4'-tetrachlorobiphenyl	9803963
AhR	3,4,5,3',4'-pentachlorobiphenyl	9803972
AhR	9,10-Dimethyl-1,2-benzanthracene	9811606
AhR	Benzo(a)pyrene	9816201
AhR	resveratrol	9820526
AhR	Tetrachlorodibenzodioxin	9874904
Arnt	2XY	9921340
Arnt	AKOS009989396	9921340
Arnt	Deferoxamine	9926791
Arnt	Ethylene Glycol	9929138
Arnt	Selenomethionine	9944650
Arnt	Tetrachlorodibenzodioxin	9950868
Arnt	ZINC04158473	9958995
Bach1	Hemin	10041614
Bach1	Isocycloheximide	10054482
SureCN37451	SureCN37451	10062716
ER-alpha	(4-14c)pregn-4-ene-3,20-dione	10181390
ER-alpha	(E)-4-Hydroxytamoxifen	10182969
ER-alpha	1,3-Benzenediol, 5-[2-(4-hydroxyphenyl)ethenyl]-	10282255
ER-alpha	14,16-Dihydroxy-3-methyl-3,4,5,6,9,10-hexahydro-1H-2-benzoxacyclotetradecine-1,7(8H)-dione	10321901
ER-alpha	17-Ethynyl estradiol	10340781
ER-alpha	17-Ethynyl-17-hydroxyestr-4-en-3-one	11020241
ER-alpha	17-Hydroxyandrost-4-en-3-one	11246488
ER-alpha	4-nonylphenol	11427553
ER-alpha	AGN-PC-00ARFA	11519653
ER-alpha	Apigenin	11655939
ER-alpha	bisphenol A	11655939
ER-alpha	calcium ion	11840973
ER-alpha	CCRIS 9140	12318718
ER-alpha	Clomiphene	12654133
ER-alpha	Coumestrol	15947913
ER-alpha	Estriol	16038120
ER-alpha	fulvestrant	16109538
ER-alpha	Genistein	16109597
ER-alpha	Glycerol	16255105
ER-alpha	Hydroxyestrones	16659841
ER-alpha	LY 117018	16659841
ER-alpha	Methoxychlor	16659841
ER-alpha	Methylnitrosourea	16659841
ER-alpha	Ovasterol-beta	16758218
ER-alpha	Raloxifene	18427360
ER-alpha	ST013886	23631950
ER-alpha	STK366316	23669323
ER-alpha	SureCN344188	24202429
ER-alpha	tibolone	24825709
ER-alpha	Zinc	24905707
FosB	2-(2-amino-3-methoxyphenyl)-4H-1-benzopyran-4-one	24905708
FosB	3'-O-(4-benzoyl)benzoyladenosine 5'-triphosphate	25102263
FosB	66575-29-9	25108494
FosB	Amphetamine	25154041
FosB	ara-ATP	25171665
FosB	calcium ion	25171665
FosB	Carbachol	25171873
FosB	Cocaine	25171873
FosB	dl-Phenylephrine	25171874
FosB	Ethanol	25171874
FosB	Genistein	25195002
FosB	Glutamic Acid	25202035
FosB	Haloperidol	25202084
FosB	Hydrogen Peroxide	25202084
FosB	Isocycloheximide	25202084
FosB	Methamphetamine	25202084
FosB	N-(1-methyl-5-indolyl)-N'-(3-methyl-5-isothiazolyl)urea	25202084
FosB	Nicotine	25202238
FosB	Nitric Oxide	25202430
FosB	Vidarabine	25268906
Fra-1	15-hydroxy-5,8,11,13-eicosatetraenoic acid	25880656
Fra-1	2-tert-butylhydroquinone	25880656
Fra-1	5-methylbenzimidazole	25880656
Fra-1	Calcimycin	25880656
Fra-1	CID 11020241	25880656
Fra-1	CTK8F0358	25880656
Fra-1	Ganciclovir	25880664
Fra-1	gefitinib	25880664
Fra-1	Nimustine	25880664
Fra-1	NSC94017	25880664
JunB	2-Aminoadipic Acid	42625189
JunB	3,7-Dimethoxy-6-hydroxyphenanthroindolizidine	43805017
JunB	Acetaldehyde	44135022
JunB	alpha-aminobutyric acid	44208030
JunB	Amitrole	44217243
JunB	Amphetamine	44268108
JunB	Benzene	44425197
JunB	dl-Phenylephrine	44432287
JunB	Isoproterenol	44473520
JunB	Nitric Oxide	44474161
JunB	NSC302991	44474163
JunB	Oxidopamine	44474458
JunB	tylophorinidine	44475086
Max	Methoxychlor	44582630
NCXNcx	1-Piperazineethanesulfonic acid, 4-(2-hydroxyethyl)-	44634693
NCXNcx	66575-29-9	44634693
NCXNcx	AGN-PC-00IQUF	45270874
NCXNcx	ara-ATP	45483580
NCXNcx	Benzodiazepines	46215988
NCXNcx	calcium ion	46215988
NCXNcx	CBD2	49835940
NCXNcx	Clonazepam	50909916
NCXNcx	Glycerol	52946850
NCXNcx	Guanidine	53247983
NCXNcx	hexylene glycol	53247984
NCXNcx	NCGC00025073-01	53247985
NCXNcx	NSC25485	53247986
NCXNcx	sodium ion	53248037
NCXNcx	sulfate	53248554
NF-E2	oxido(dioxo)vanadium	53248592
CHOP-10	4-(azepan-1-yl)aniline	53248593
CHOP-10	4a,8-dimethyl-3-methylidene-3,3a,4,4a,7a,8,9,9a-octahydroazuleno[6,5-b]furan-2,5-dione	53248594
CHOP-10	girinimbine	53248595
CHOP-10	GNF-Pf-4012	53248629
CHOP-10	Chloroform	53248630
CHOP-10	GNF-Pf-3276	53248631
CHOP-10	AC1LUY8A	53248633
CHOP-10	CHEMBL2311694	53477714
CHOP-10	AC1LKHAS	53477714
CHOP-10	withanolide D	53477714
CHOP-10	ZINC00206253	53629505
CHOP-10	Mercaptoethanol	53629505
CHOP-10	Dimethyl Sulfoxide	53629505
CHOP-10	3,5-dimethyl-3-(4-methylpent-3-en-1-yl)-3,11-dihydropyrano[3,2-a]carbazol-9-ol	53629505
CHOP-10	2-Acetyl-3-(4-bromo-phenyl)-[1,4]naphthoquinone	54728656
CHOP-10	9-methoxyellipticine	71295745
CHOP-10	2-aminophenanthrene-9,10-dione	11533853

## Sheet: Supplemental Information 5
TCM	components			SMILES
Gastrodia elata BL.	protocatechualdehyde			O=C([H])C(C([H])=C1[H])=C([H])C(O[H])=C1O[H]
	4-(4'-Hydroxybenzyloxy)benzyl methyl ether			CCOCC1=CC=C(C=C1)OCC2=CC=C(C=C2)O[H]
	4,4'-Dihydroxydiphenyl methane			[H]OC1=CC=C(C=C1)CC2=CC=C(O[H])C=C2
	p-Cresol			CC1=CC=C(C=C1)O
	4-Ethoxymethylphenyl-4'-hydroxybenzylether			CCOCC1=CC=C(C=C1)OCC2=CC=C(C=C2)O[H]
	quebrachol			[H]C1(C2([H])C3([H])C(C([H])([H])C([H])([H])C4([H])O[H])(C([H])([H])[H])C(C4([H])[H])=C([H])C2([H])[H])C(C([H])([H])C3([H])[H])(C([H])([H])[H])C(C(C([H])([H])[H])([H])C([H])([H])C([H])([H])C(C([H])([H])C([H])([H])[H])([H])C(C([H])([H])[H])([H])C([H])([H])[H])([H])C([H])([H])C1([H])[H]
	p-methylphenyl-1-O-β-D-glucopyranoside			CC1=CC=C(O[C@@H]2C[C@H](COC(C)=O)[C@@H](OC(C)=O)[C@@H](OC(C)=O)[C@H]2OC(C)=O)C=C1
	p-Hydroxybenzyl ethyl ether			CCOCC1=CC=C(O[H])C=C1
	p-hydroxylbenzyl alcohol			[H]C1=C(C([H])([H])O[H])C([H])=C([H])C(O[H])=C1[H]
	P-Hydroxybenzaldehyde			OC1=CC=C(C=C1)C=O
	4-(methoxymethyl)phenol			[H]C(C(C([H])=C1[H])=C([H])C([H])=C1O[H])([H])OC([H])([H])[H]
	Gastrodin			C1=CC(=CC=C1CO)OC2C(C(C(C(O2)CO)O)O)O
	4-ethoxymethylphenol			[H]C(C(C([H])=C1[H])=C([H])C([H])=C1O[H])([H])OC([H])([H])C([H])([H])[H]
	Citric Acid			O=C(C(CC(O)=O)(O)CC(O)=O)O
	3-hydroxy-3-methoxycarbonylpentanedioic acid			O=C(C(C([H])([H])C(O[H])=O)(C([H])([H])C(O[H])=O)O[H])OC([H])([H])[H]
	dimethyl citric acid			O=C(CC(C(O)=O)(C)CC(OC)=O)OC
	daucosterol			[H]C1([C@@]2([H])[C@]3([H])[C@](C([H])([H])C([H])([H])[C@]4([H])OC(C(C5([H])O[H])([H])O[H])([H])OC(C([H])([H])O[H])([H])C5([H])O[H])(C([H])([H])[H])C(C4([H])[H])=C([H])C2([H])[H])C(C([H])([H])C3([H])[H])(C([H])([H])[H])C(C(C([H])([H])[H])([H])C([H])([H])C([H])([H])C(C([H])([H])C([H])([H])[H])([H])C(C([H])([H])[H])([H])C([H])([H])[H])([H])C([H])([H])C1([H])[H]
	Succinic acid			OC(CCC(O)=O)=O
	dimethyl phthalate			O=C(C1=C([H])C([H])=C([H])C([H])=C1C(OC([H])([H])[H])=O)OC([H])([H])[H]
	cymbinodin A			O=C(C(OC([H])([H])[H])=C1[H])C2=C(C1=O)C([H])=C([H])C3=C2C(O[H])=C([H])C([H])=C3[H]
	margaric acid			O=C(C([H])([H])C([H])([H])C([H])([H])C([H])([H])C([H])([H])C([H])([H])C([H])([H])C([H])([H])C([H])([H])C([H])([H])C([H])([H])C([H])([H])C([H])([H])C([H])([H])C([H])([H])C([H])([H])[H])O[H]
	3[4-(β-D-glucopyranosyloxy)benzyl]citric acid ester			OC(C(OCC1=CC=C(ON[C@@H](CCC(O)=O)C(C)=O)C=C1)=O)(CC(OCC2=CC=C(ON[C@@H](CCC(O)=O)C(C)=O)C=C2)=O)CC(OCC3=CC=C(ON[C@@H](CCC(O)=O)C(C)=O)C=C3)=O
	Bis(4-hydroxybenzyl)ether			[H]OC(C=C1)=CC=C1COCC2=CC=C(O[H])C=C2
	Bis(4-hydroxybenzyl)ether mono-β-D-glucopyranoside			OC[C@H]1O[C@@H](OC(C=C2)=CC=C2COCC3=CC=C(O)C=C3)[C@H](O)[C@@H](O)[C@@H]1O
	Vitamin A			OC/C=C(C)/C=C/C=C(C)/C=C/C(C1(C)C)=C(CCC1)C
	Adenine			NC1=C2NC=NC2=NC=N1
	adenosine			O[C@H]1[C@H](N2C3=NC=NC(N)=C3N=C2)O[C@H](CO)[C@H]1O
	citronellol			[H]C(C([H])([H])C([H])([H])O[H])(C([H])([H])[H])C([H])([H])C([H])([H])/C([H])=C(C([H])([H])[H])/C([H])([H])[H]
	vanillin			O=C([H])C(C([H])=C1[H])=C([H])C(OC([H])([H])[H])=C1O[H]
	vanillyl alcohol			[H]C1=C(C([H])([H])O[H])C([H])=C([H])C(O[H])=C1OC([H])([H])[H]
	palmitic acid			CCCCCCCCCCCCCCCC(O)=O
	p-methylphenyl-1-o-β-D-glucopyranoside			[H]C(C(C(C([H])([H])O[H])([H])OC1([H])OC2=C([H])C([H])=C(C([H])([H])[H])C([H])=C2[H])([H])O[H])(C1([H])O[H])O[H]
	Pyrrolidonecarboxylic Acid			O=C1N([H])C(C(O[H])=O)([H])C([H])([H])C1([H])[H]
	Parishin			O=C(C(C([H])([H])C(OC([H])([H])C1=C([H])C([H])=C(C([H])=C1[H])O[C@]2([H])O[C@@](C([H])([H])O[H])([H])[C@@]([C@]([C@@]2([H])O[H])([H])O[H])([H])O[H])=O)(C([H])([H])C(OC([H])([H])C3=C([H])C([H])=C(C([H])=C3[H])O[C@]4([H])O[C@@](C([H])([H])[H])([H])[C@@]([C@]([C@@]4([H])O[H])([H])O[H])([H])O[H])=O)O[H])OC5=C([H])C([H])=C(C([H])=C5[H])O[C@@]6([H])O[C@@](C([H])([H])O[H])([H])[C@@]([C@]([C@@]6([H])O[H]…
	Uridine			OC[C@@H]1O[C@@H](N2C=CC(NC2=O)=O)[C@@H]([C@H]1O)O
	Uracil			O=C1NC=CC(N1)=O
	4-hydroxybenzoic acid			O=C(C(C([H])=C1[H])=C([H])C([H])=C1O[H])O[H]
	palmitoyl glycerol			O=C(C([H])([H])C([H])([H])C([H])([H])C([H])([H])C([H])([H])C([H])([H])C([H])([H])C([H])([H])C([H])([H])C([H])([H])C([H])([H])C([H])([H])C([H])([H])C([H])([H])C([H])([H])[H])OC([H])([H])C(C([H])([H])O[H])([H])O[H]
Trillium tschonoskii Maxim.	Diosgenin			CC1CCC2(C(C3C(O2)CC4C3(CCC5C4CC=C6C5(CCC(C6)O)C)C)C)OC1
	Pennogenin			C[C@@H]1CC[C@@]2(OC1)O[C@H]3CC4[C@@](CCC5C4CC=C6[C@]5(C)CC[C@H](O)C6)(C)[C@@]3(O)[C@@H]2C
	astragalin			O=C1C(O[C@@]2([H])O[C@](C([H])([H])O[H])([H])[C@]([C@@]([C@]2([H])O[H])([H])O[H])([H])O[H])=C(C(C([H])=C3[H])=C([H])C([H])=C3O[H])OC4=C([H])C(O[H])=C([H])C(O[H])=C14
	Linoleic Acid			O=C(C([H])([H])C([H])([H])C([H])([H])C([H])([H])C([H])([H])C([H])([H])C([H])([H])/C([H])=C([H])\C([H])([H])/C([H])=C([H])\C([H])([H])C([H])([H])C([H])([H])C([H])([H])C([H])([H])[H])O[H]
	Polyphyllin VI			[H][C@@]([C@@]1([H])[C@]([C@](C([H])([H])C([H])([H])[C@]2([H])O[C@]([C@]([C@@]3([H])O[H])([H])O[C@@]([C@]([C@]4([H])O[H])([H])O[H])([H])O[C@](C([H])([H])[H])([H])[C@]4([H])O[H])([H])O[C@@](C([H])([H])O[H])([H])[C@@]3([H])O[H])(C([H])([H])[H])C(C2([H])[H])=C([H])C1([H])[H])([H])C([H])([H])C5([H])[H])(C6([H])[H])[C@@]5(C([H])([H])[H])[C@]([C@@]6([H])O[C@]78OC([H])([H])[C@@](C([H])([H])[H])([H])C([H…
	polyphyllin VII			[H][C@@]([C@@]1([H])[C@]([C@](C([H])([H])C([H])([H])[C@]2([H])O[C@@]([C@@]([C@]3([H])O[C@]([C@]([C@]4([H])O[H])([H])O[H])([H])O[C@](C([H])([H])[H])([H])[C@]4([H])O[H])([H])O[H])([H])O[C@](C([H])([H])O[H])([H])[C@]3([H])O[C@]([C@]5([H])O[H])([H])O[C@](C([H])([H])O[H])([H])[C@]5([H])O[H])(C([H])([H])[H])C(C2([H])[H])=C([H])C1([H])[H])([H])C([H])([H])C6([H])[H])(C7([H])[H])[C@@]6(C([H])([H])[H])[C@]…
	Mannitol			[H]C(C(C(C([H])([H])O[H])([H])O[H])([H])O[H])(C(C([H])([H])O[H])([H])O[H])O[H]
	diosgenin glucoside			[H][C@]([C@]1([H])[C@@](C(C([H])([H])C([H])([H])[C@@]2([H])OC(C(C3([H])O[H])([H])O[H])([H])OC(C([H])([H])O[H])([H])C3([H])O[H])(C([H])([H])[H])C(C2([H])[H])=C([H])C1([H])[H])([H])C([H])([H])C4([H])[H])(C5([H])[H])[C@]4(C([H])([H])[H])[C@@](C6([H])C([H])([H])[H])([H])[C@]5([H])OC76OC([H])([H])C(C([H])([H])[H])([H])C([H])([H])C7([H])[H]
	Pennogenin-3-α-L-Rha-β-chacotrioside			[H]C([C@@]1([H])[C@]([C@](C([H])([H])C([H])([H])[C@]2([H])O[C@]([C@]([C@@]3([H])O[H])([H])O[C@]([C@]([C@]4([H])O[H])([H])O[H])([H])O[C@](C([H])([H])[H])([H])C4([H])O[H])([H])O[C@@](C([H])([H])O[H])([H])[C@@]3([H])O[C@]([C@]([C@]5([H])O[H])([H])O[H])([H])O[C@](C([H])([H])[H])([H])[C@]5([H])O[C@]([C@@]([C@]6([H])O[H])([H])O[H])([H])O[C@](C([H])([H])[H])([H])[C@]6([H])O[H])(C([H])([H])[H])C(C2([H])[…
	3-O-α-L-rhamnopyranosyl(1→3)stigmasterol glycosides			[H][C@@]1([C@]2([H])[C@]3([H])[C@@](C([H])([H])C([H])([H])[C@]4([H])OC(C(C5([H])O[H])([H])O[H])([H])OC(C([H])([H])O[H])([H])C5([H])O[H])(C([H])([H])[H])C(C4([H])[H])=C([H])C2([H])[H])[C@](C([H])([H])C3([H])[H])(C([H])([H])[H])C(C(C([H])([H])[H])([H])C([H])([H])C([H])([H])C(C([H])([H])C([H])([H])[H])([H])C(C([H])([H])[H])([H])C([H])([H])[H])([H])C([H])([H])C1([H])[H]
	3-O-β-D-glucopyranosyl(1→3)-α-L-rhamnopyranosyl dioscin			CC1CCC2(C(C)C3C(CC4C3(C)CCC5C4CC=C6C5(C)CCC(OC7C(OC8C(O)C(O)C(O)C(C)O8)CCC(O)O7)C6)O2)OC1
	Pennogenin－3－O－α－L－arabinofuranosyl－（1→4)－[a－l－rhamnopyranosyl－（l→2)]-β-D－glucopyranoside			O[C@@H]1O[C@H](C)O[C@@H](O[C@@H]2[C@@H](O)[C@H](O)[C@@H](CO)O[C@H]2OC3CCC4(C)C(C3)=CCC5C4CCC6(C)C5CC7C6(O)C(C)[C@]8(OC[C@H](C)CC8)O7)[C@@H]1O
	26-Chloro-26-deoxycryptogenin			O=C(C1)[C@H]([C@H](C)C(CC[C@@H](C)CCl)=O)[C@]2(C)[C@]1([H])[C@]3([H])CC=C4C[C@@H](O)CC[C@]4(C)[C@@]3([H])CC2
	Trillarin			O[C@H]1[C@H](O[C@@H]2[C@@H](CO)O[C@@H](O[C@H]3CC[C@]4(C)[C@@]5([H])CC[C@]6(C)[C@]7([H])[C@@H](O[C@@]8(OC[C@H](C)CC8)[C@H]7C)C[C@@]6([H])[C@]5([H])CC=C4C3)[C@H](O)[C@H]2O)O[C@H](CO)[C@@H](O)[C@@H]1O
